# Supplementary material for: The unintended consequences of inconsistent pandemic control policies
Source: bioRxiv or medRxiv preprint supplement (doi:10.1101/2020.08.21.20179473), 2020-10-28

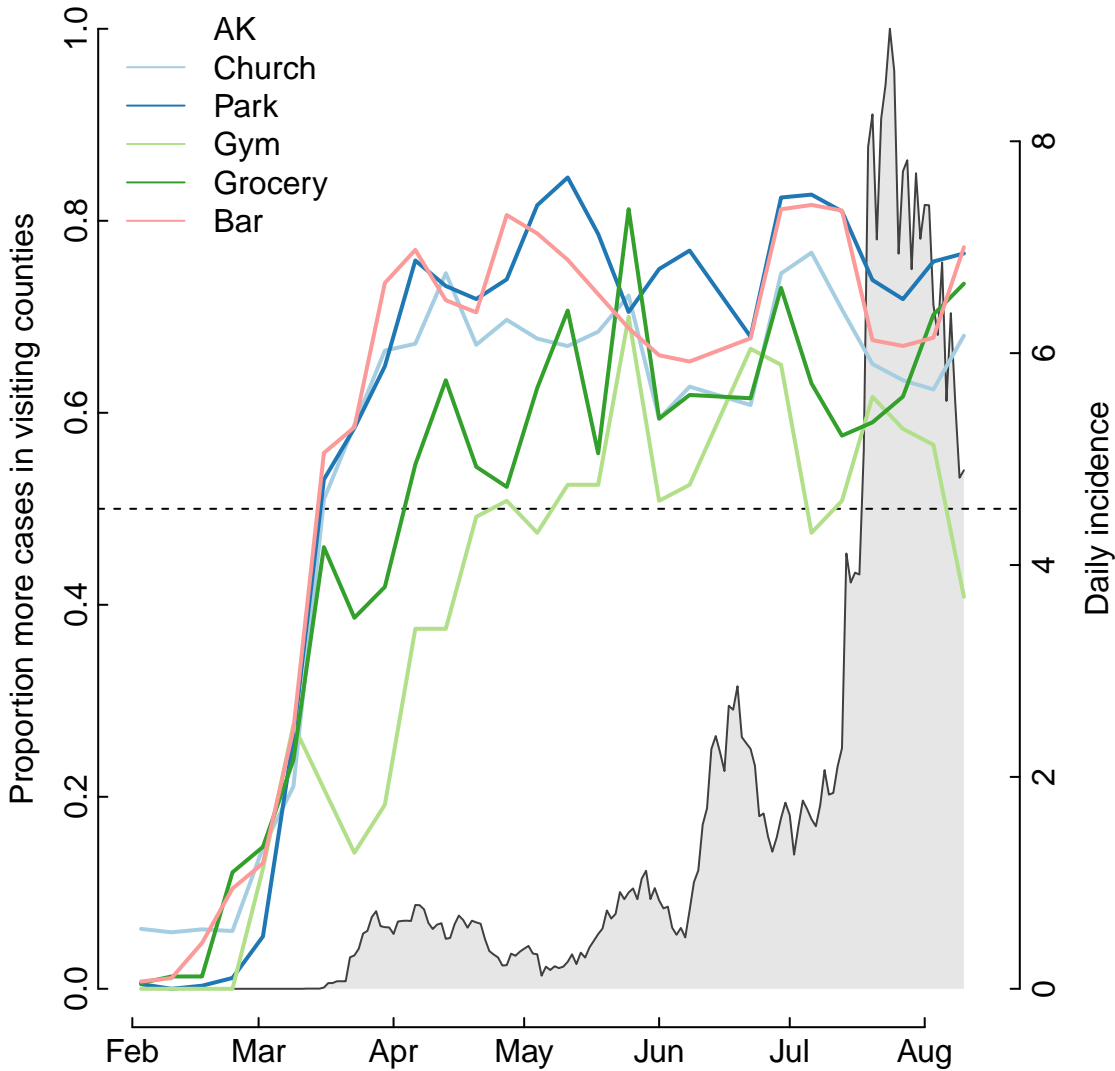



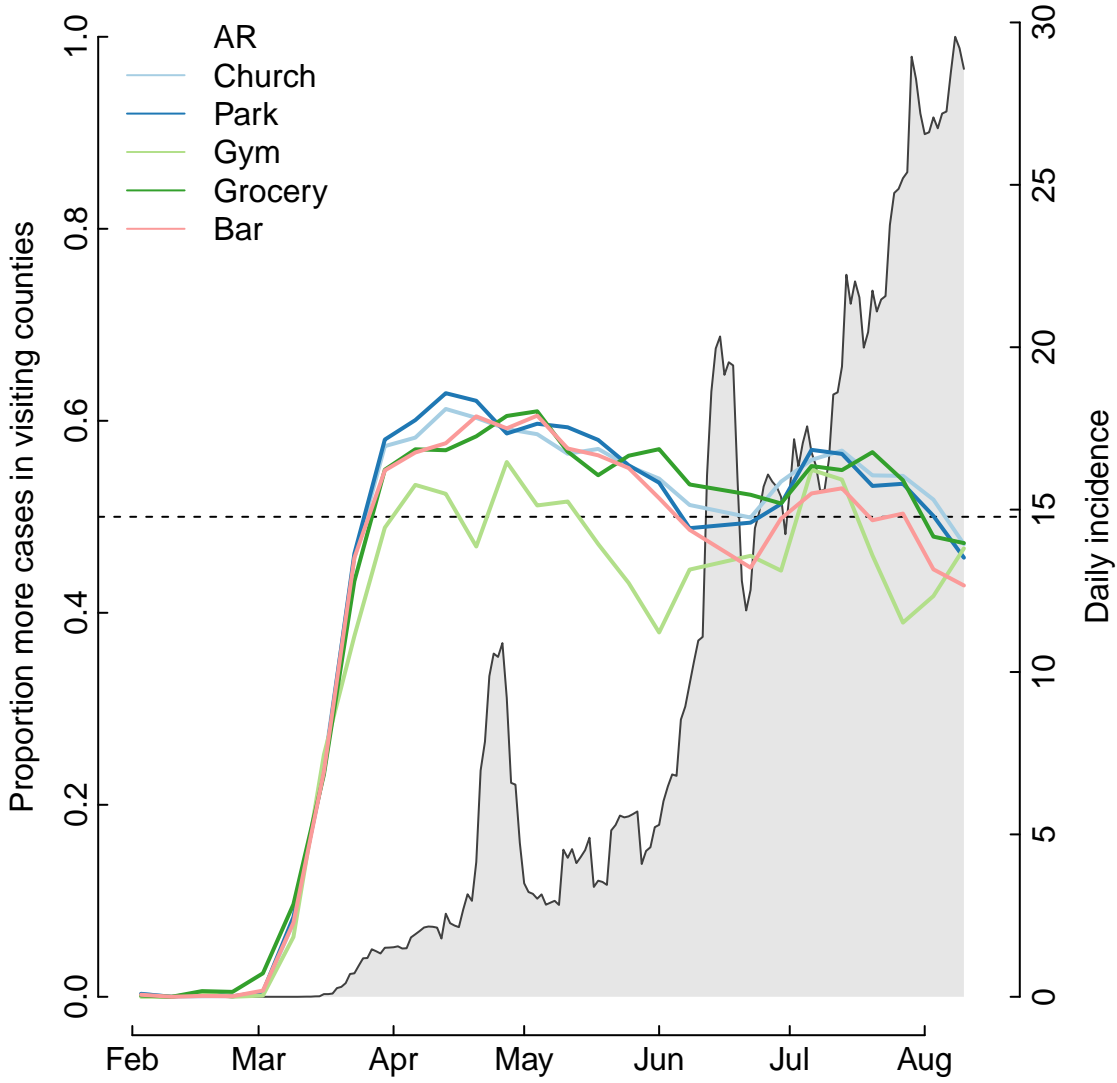

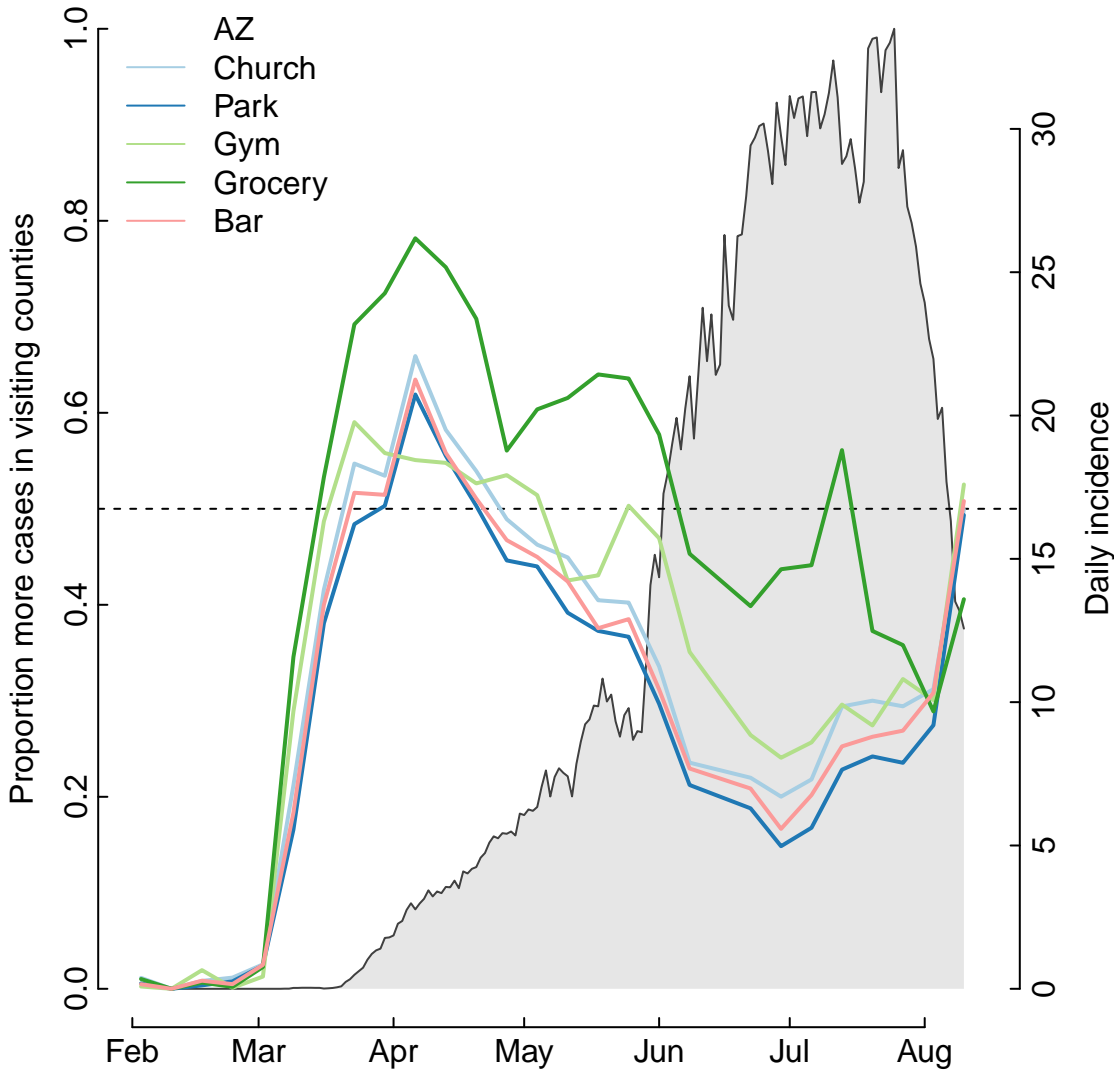

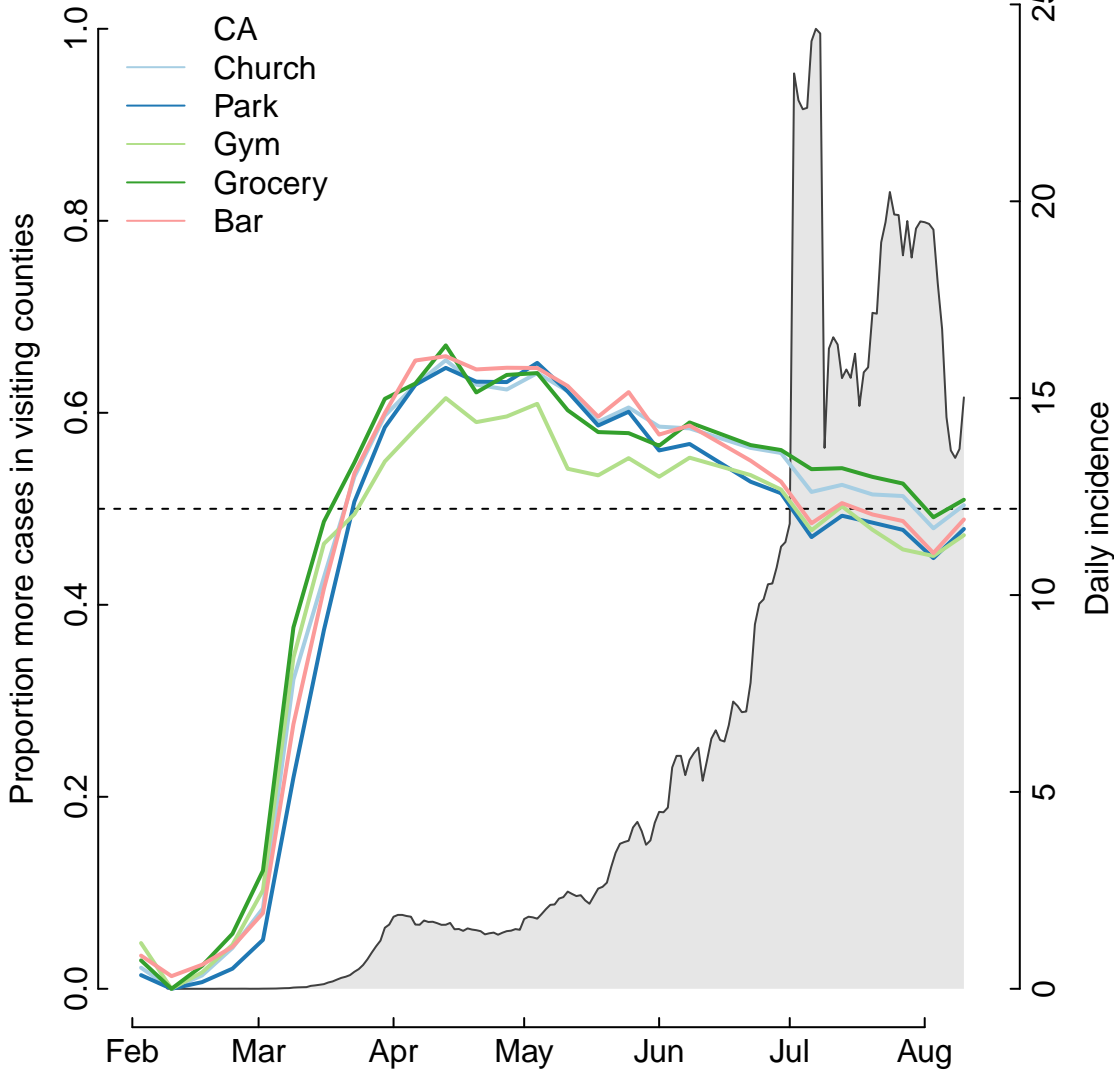





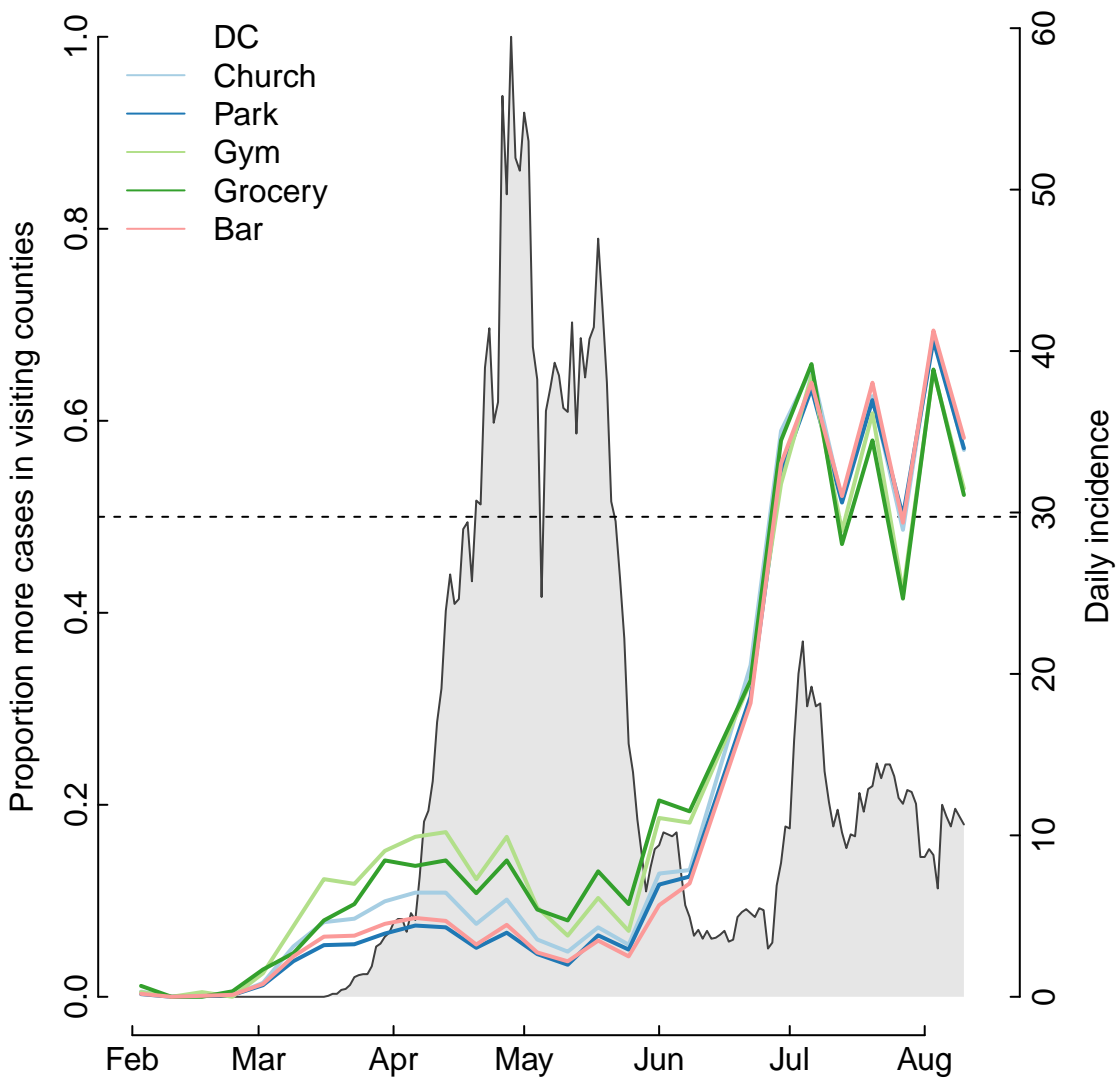



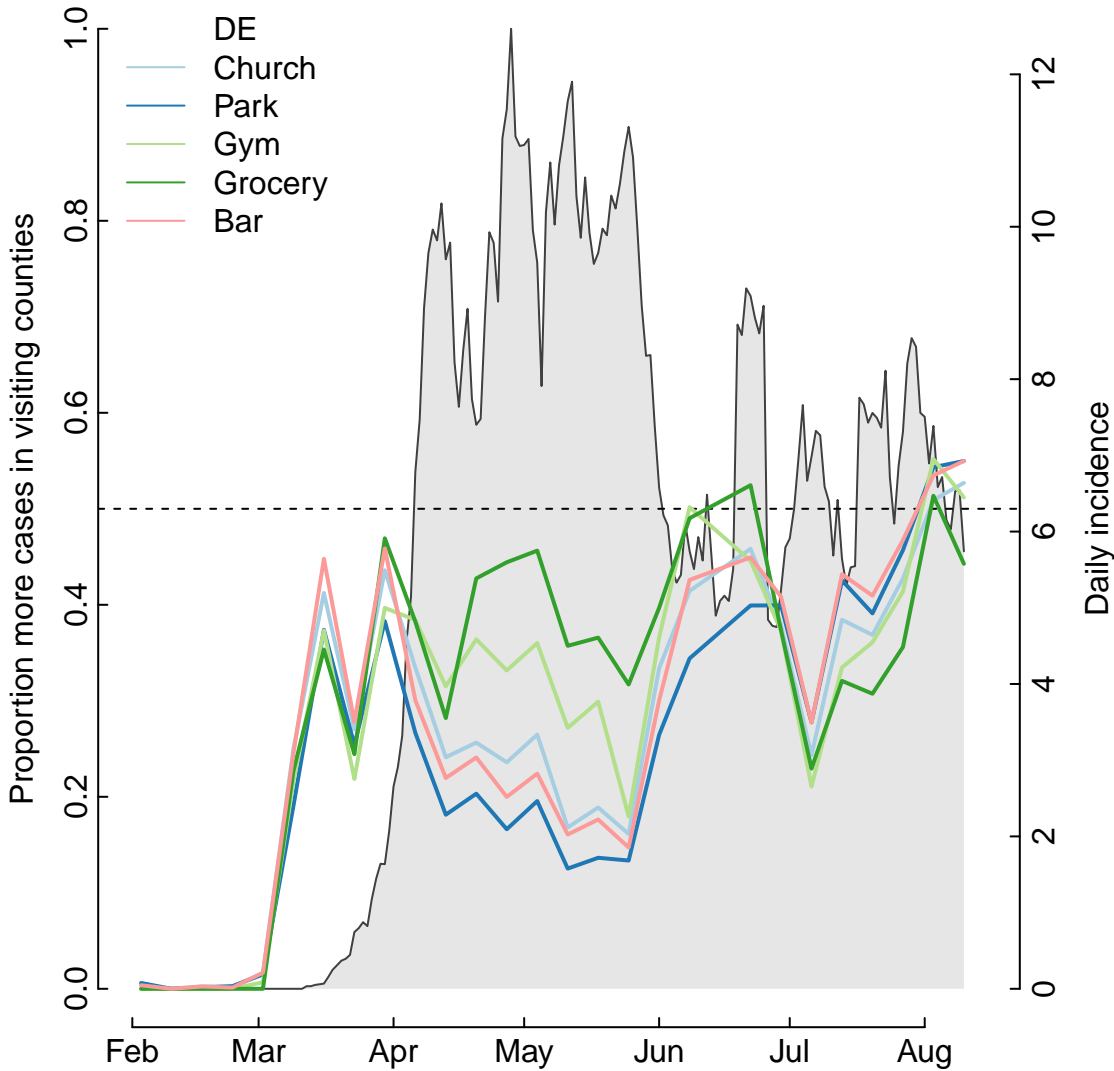

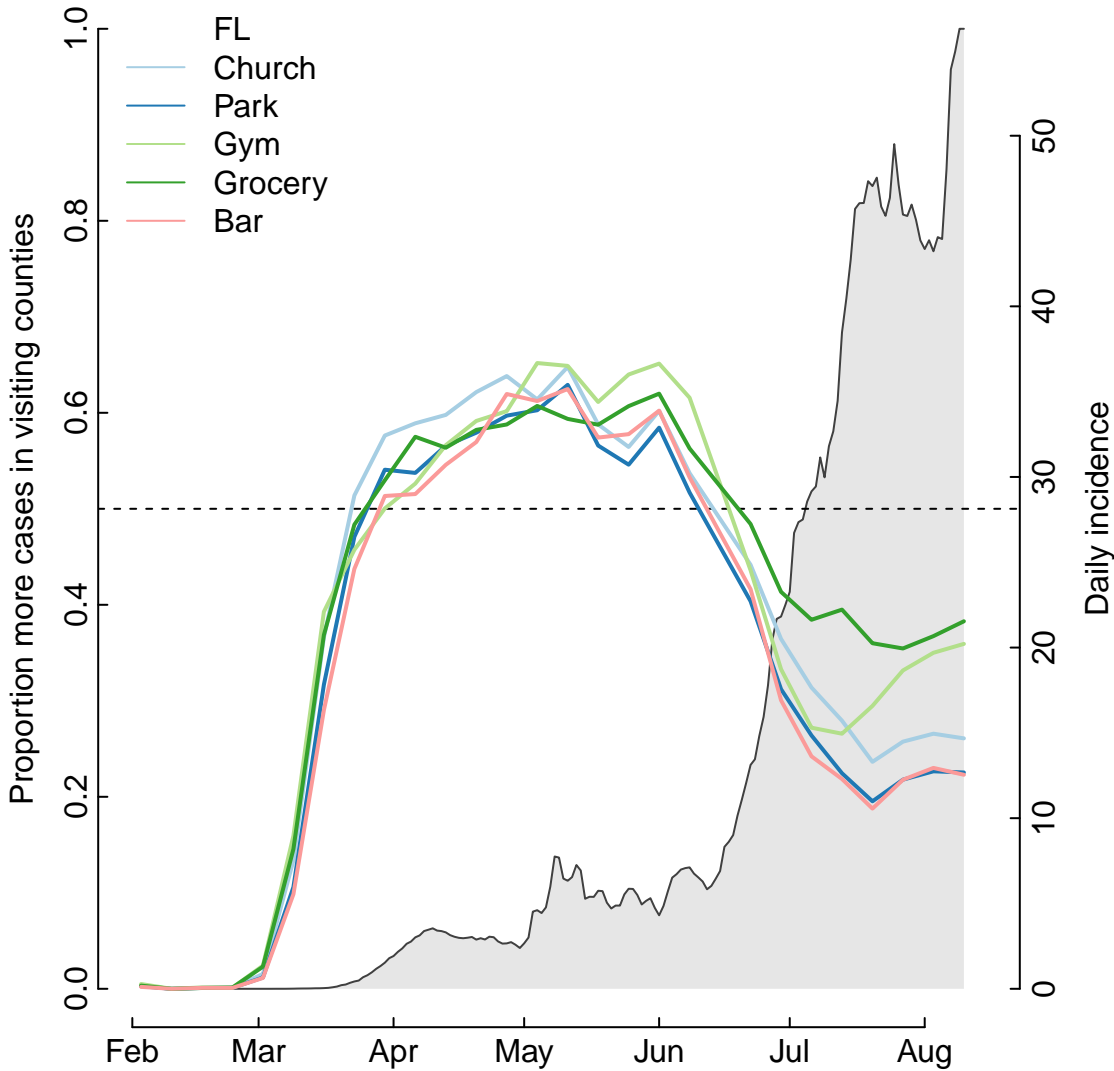



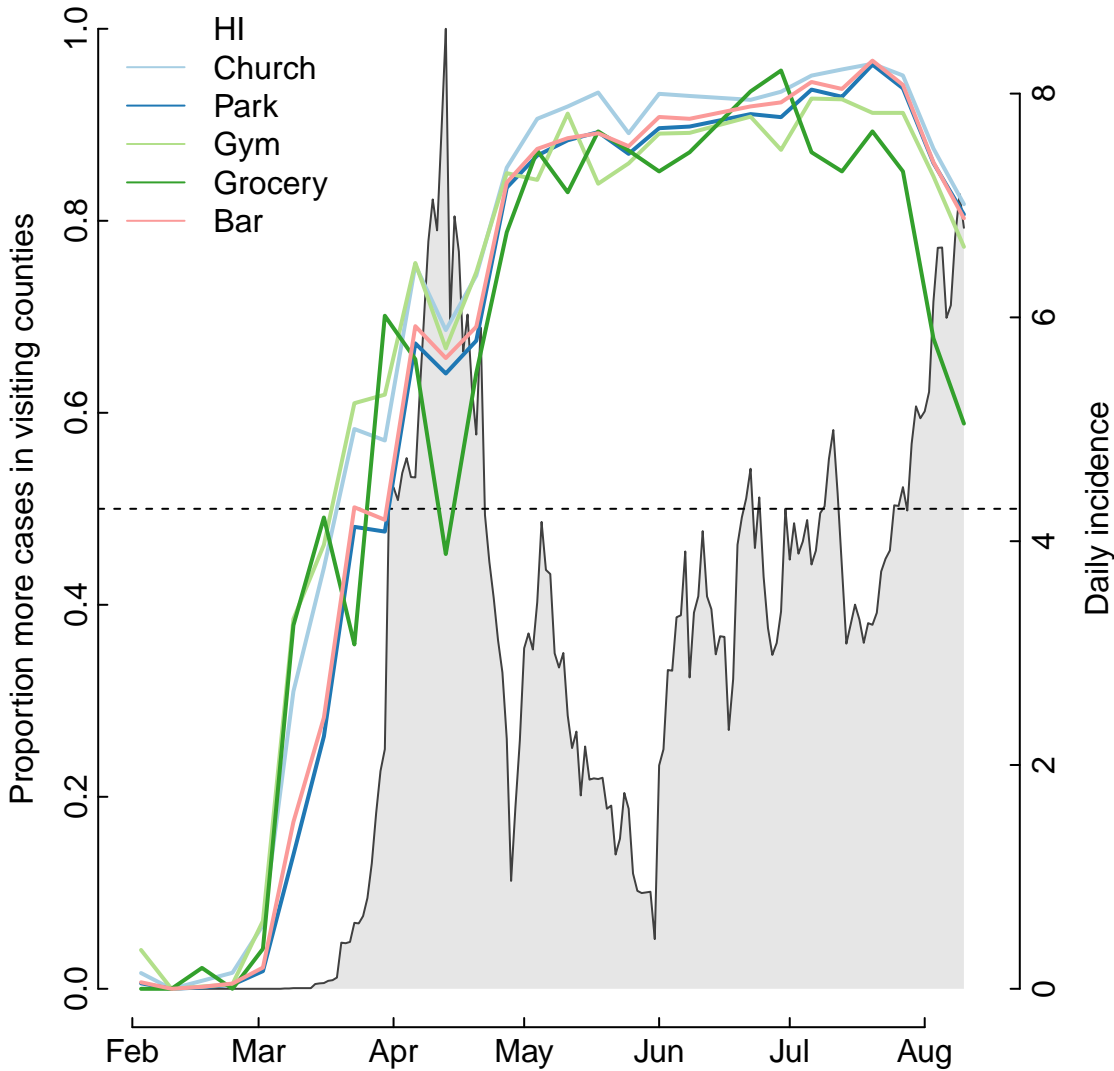

Proportion more cases in visiting counties

- IA
- Church
- Park
- Gym
- Grocery
- Bar

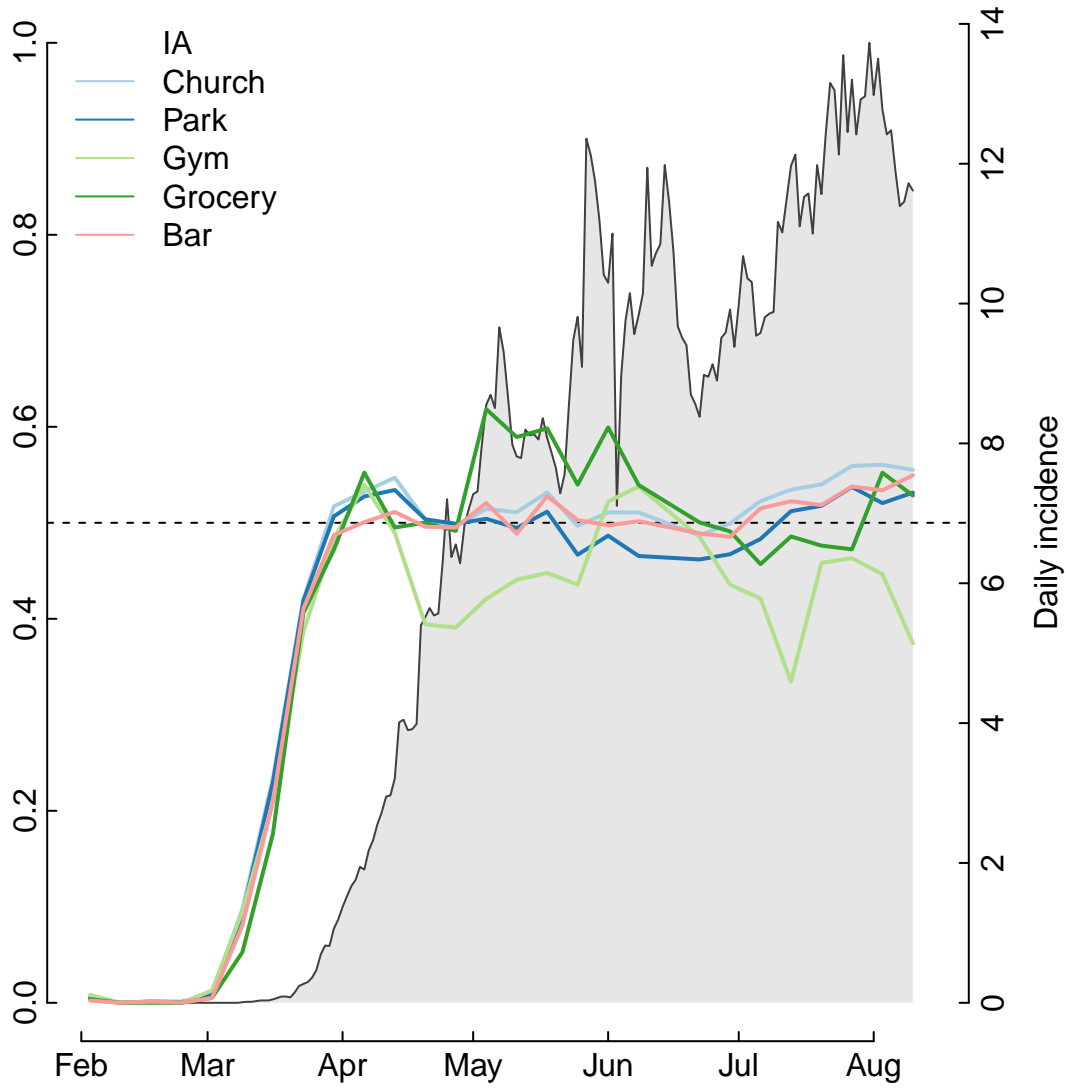

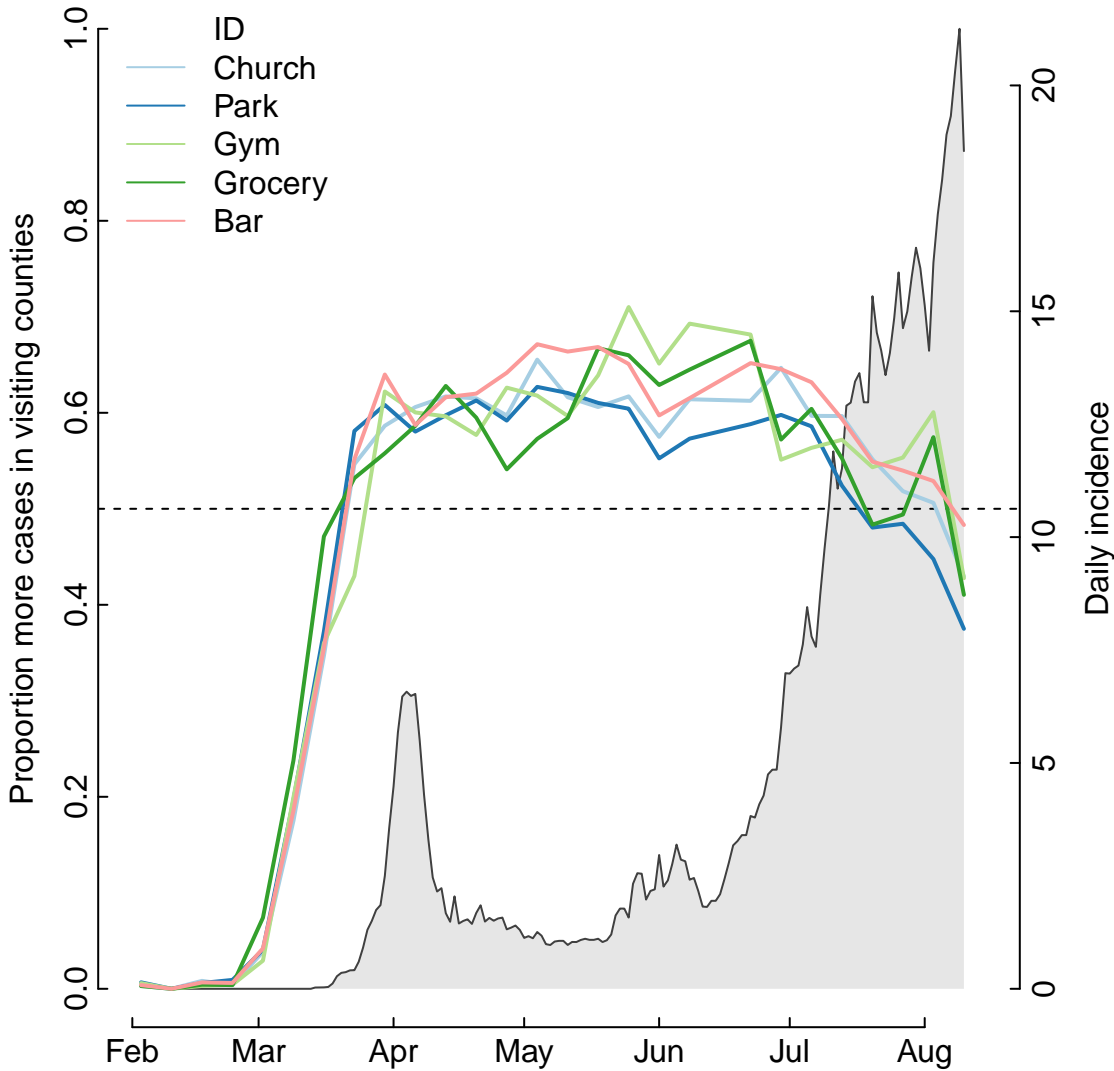







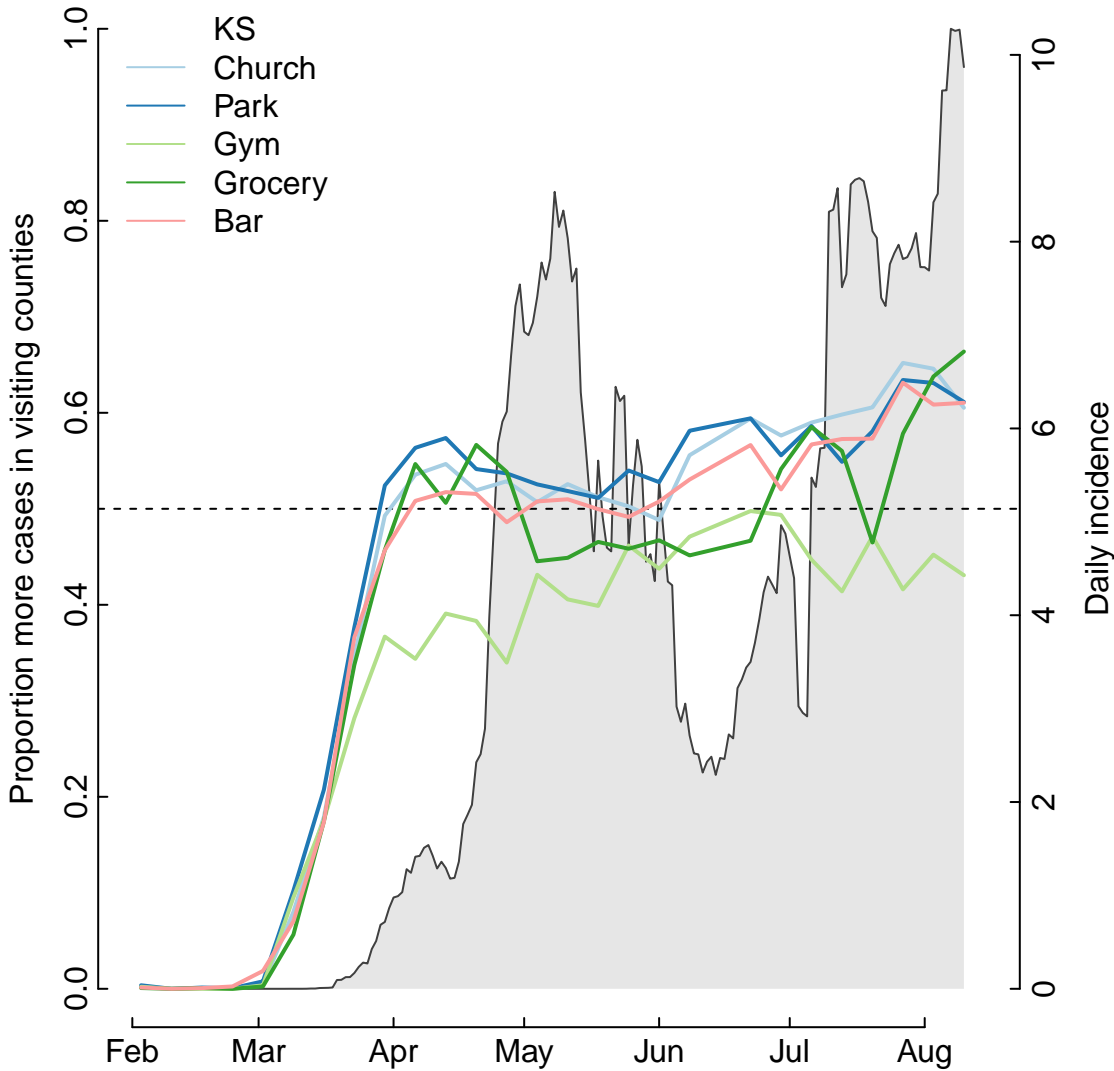

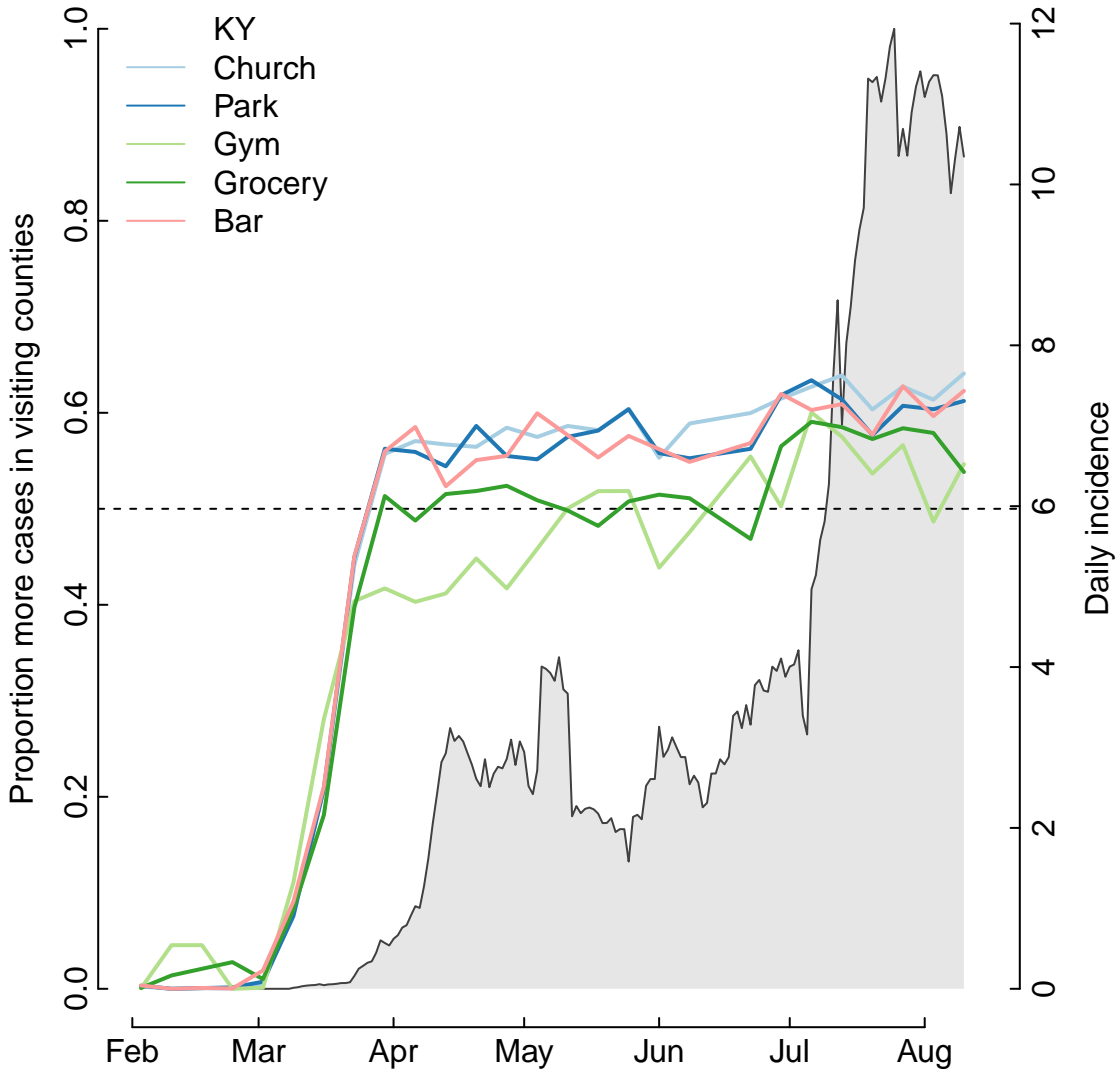

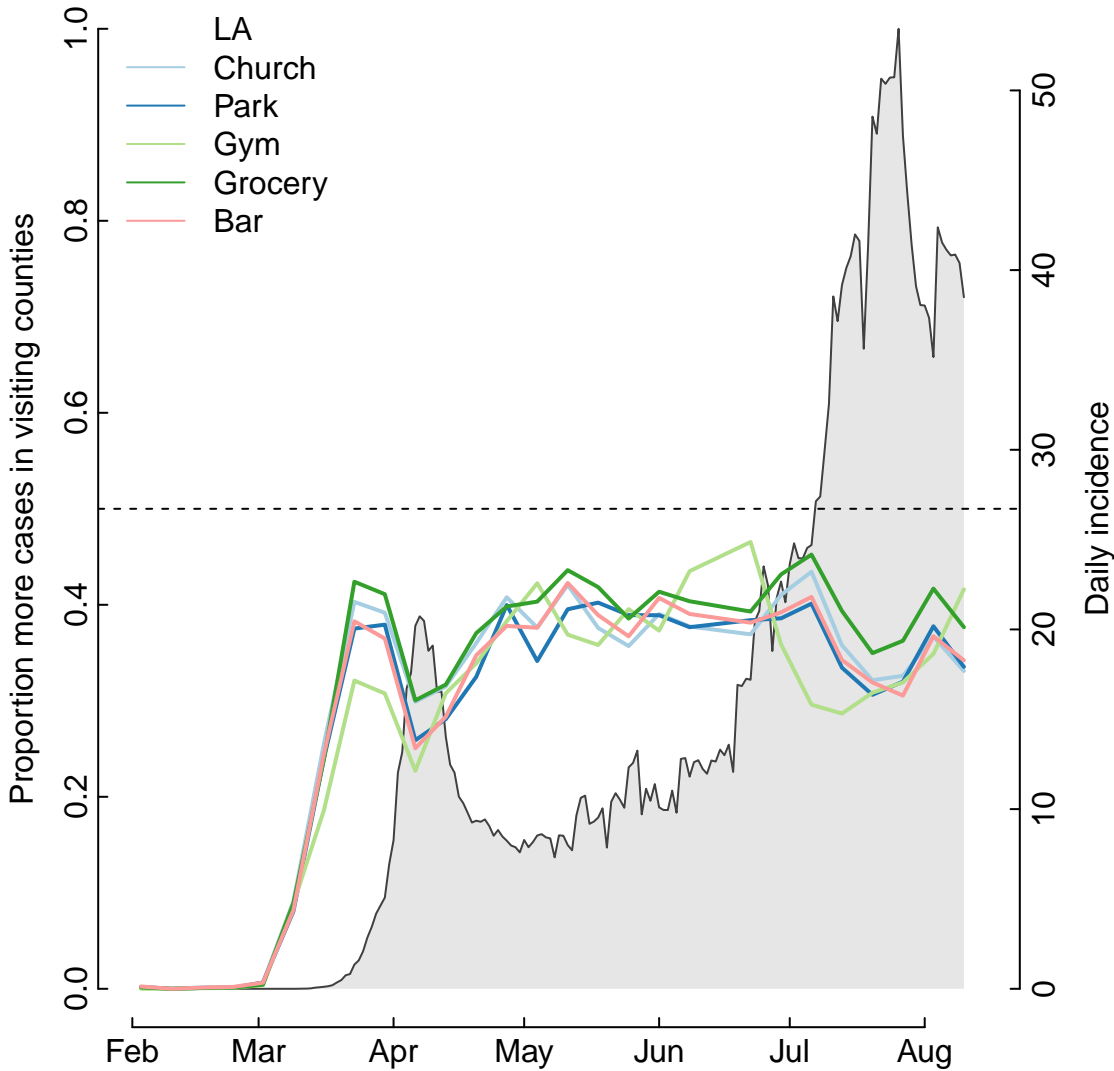

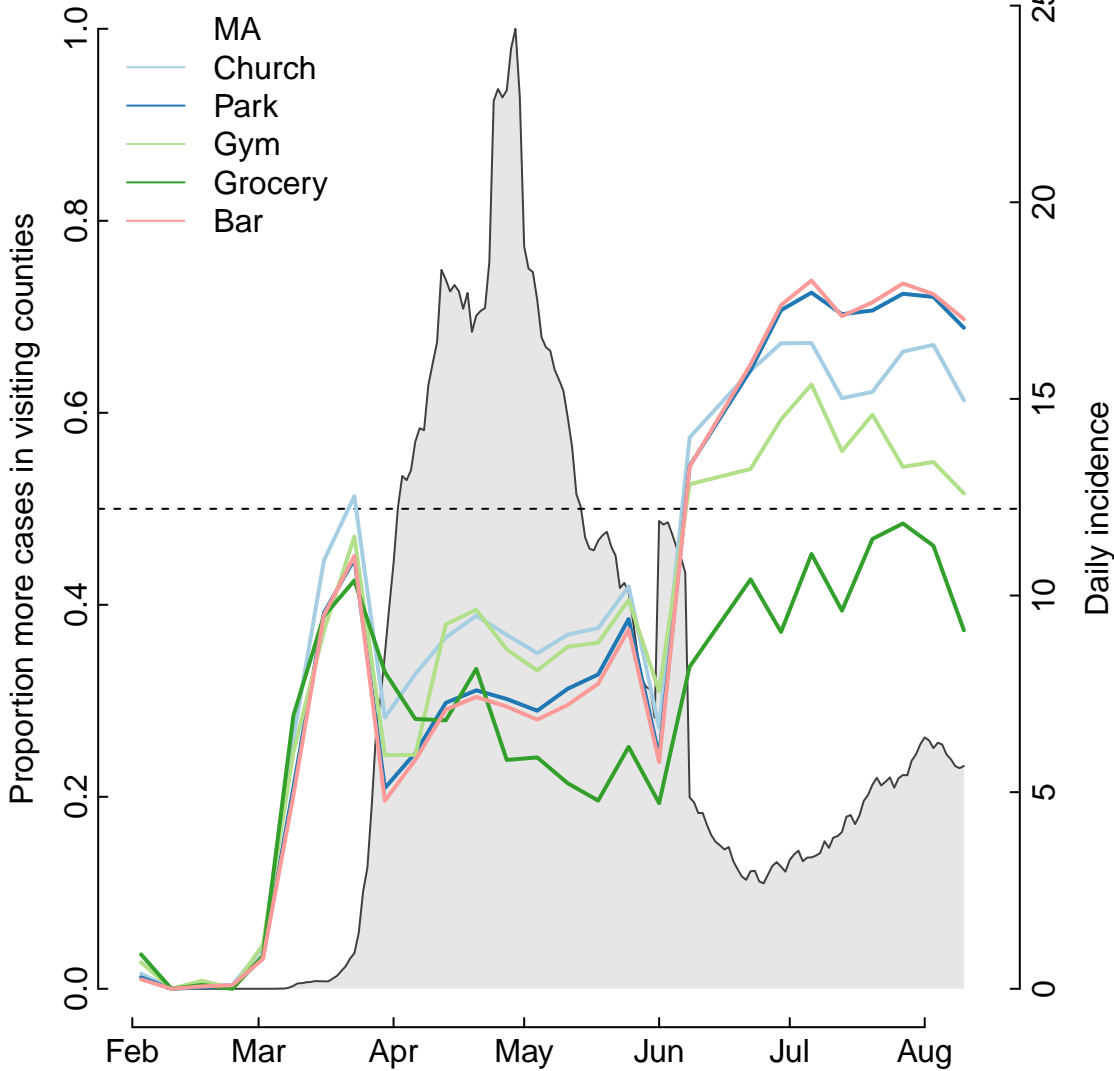

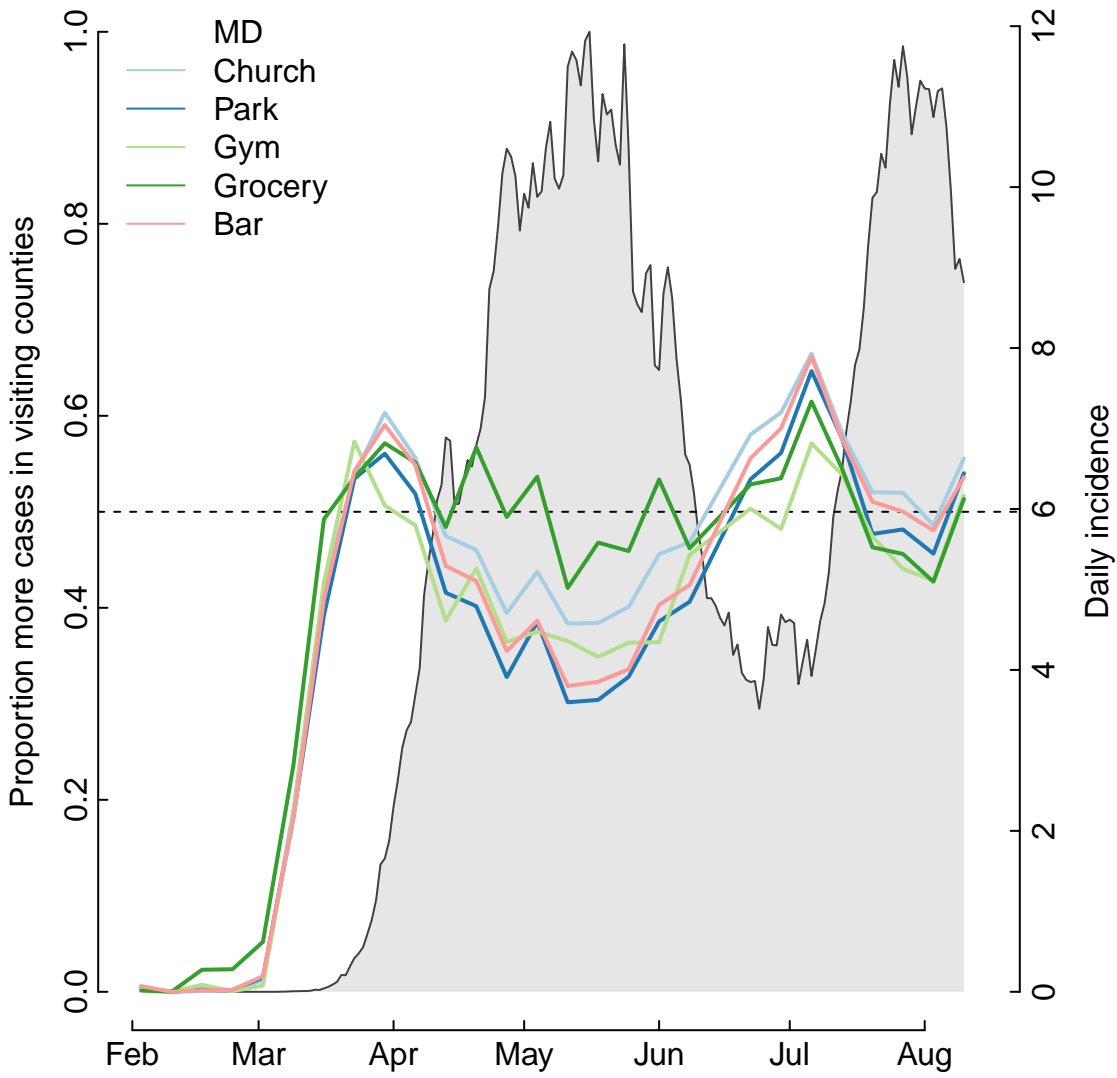

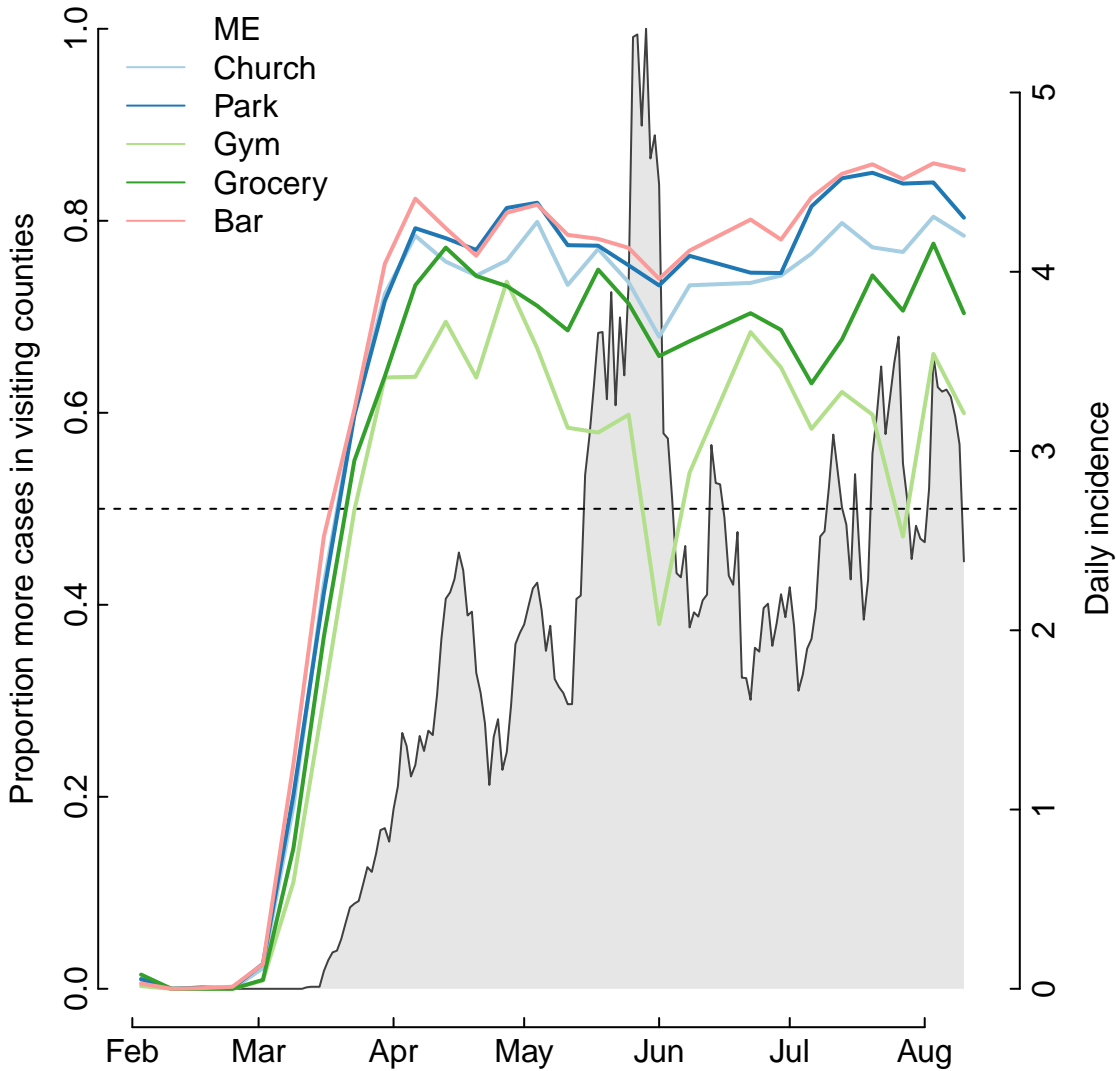







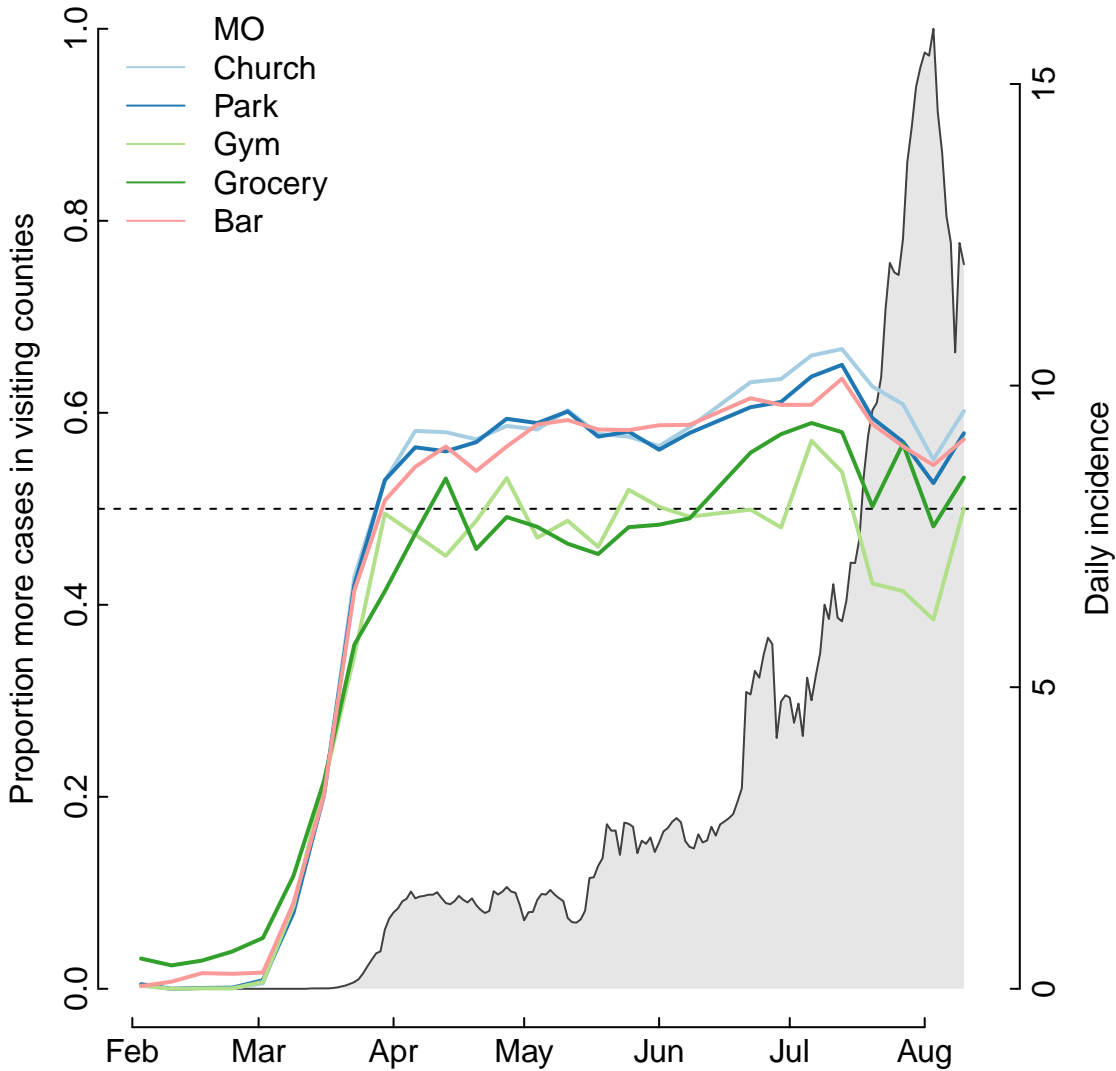

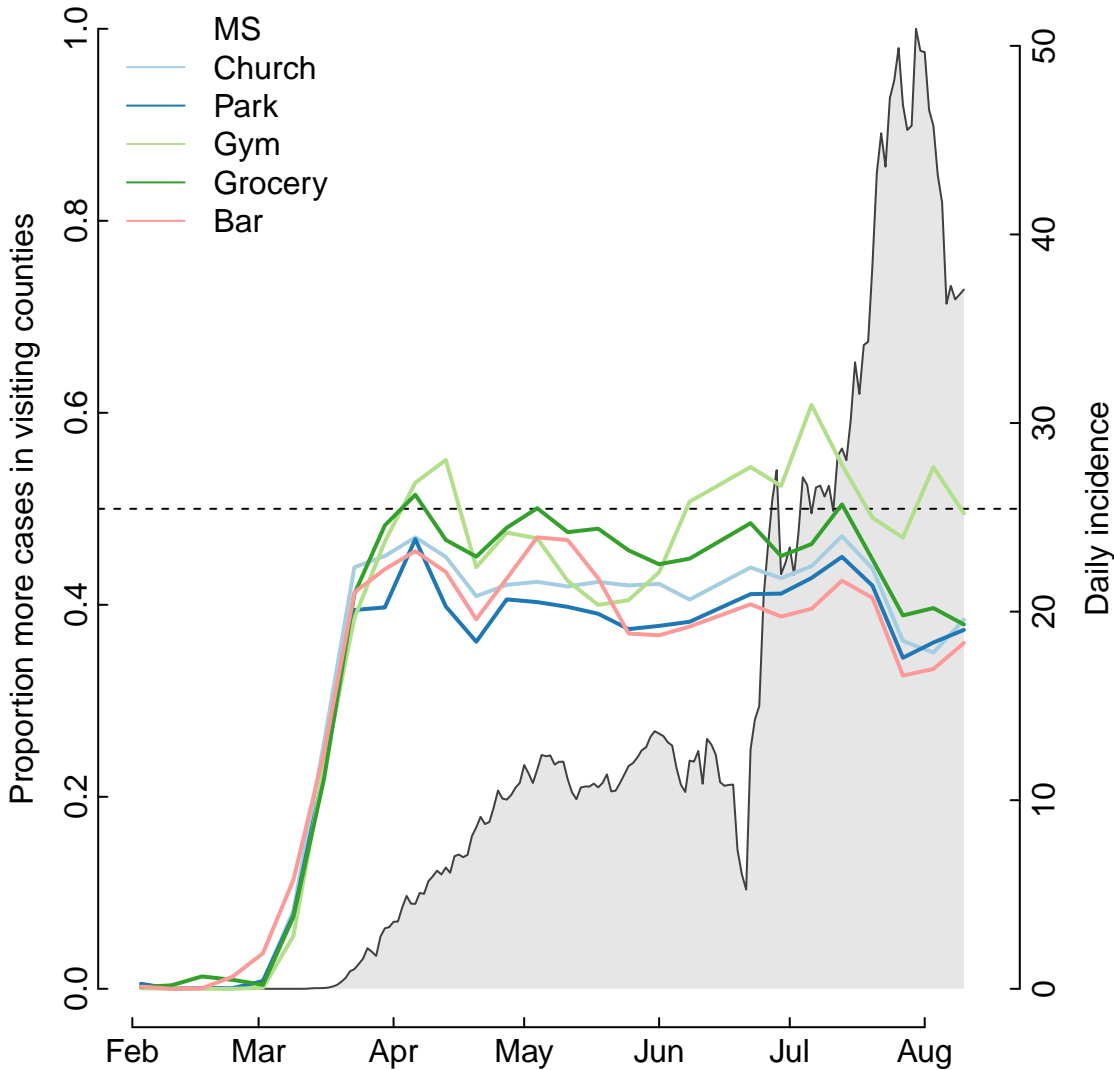

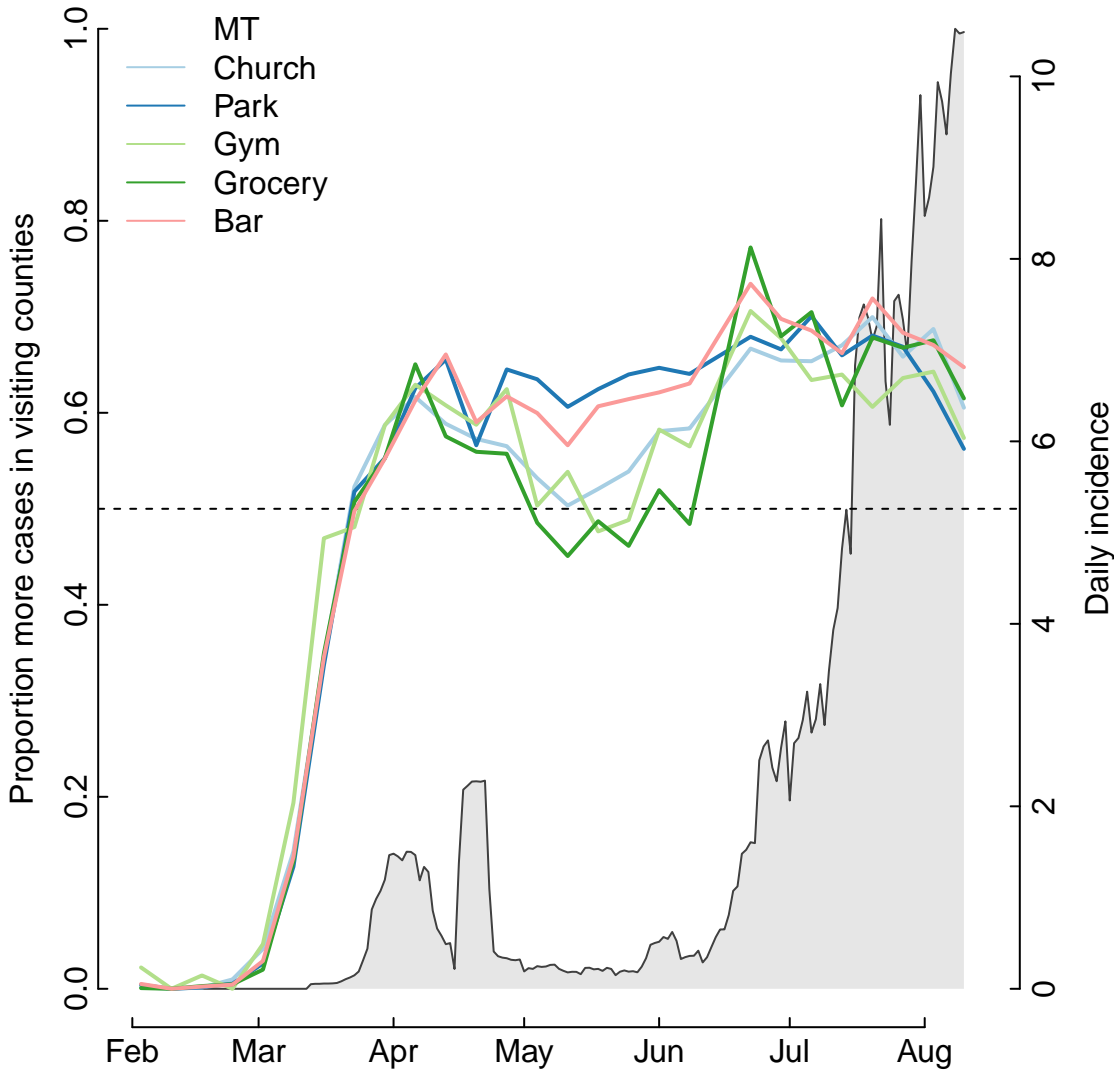

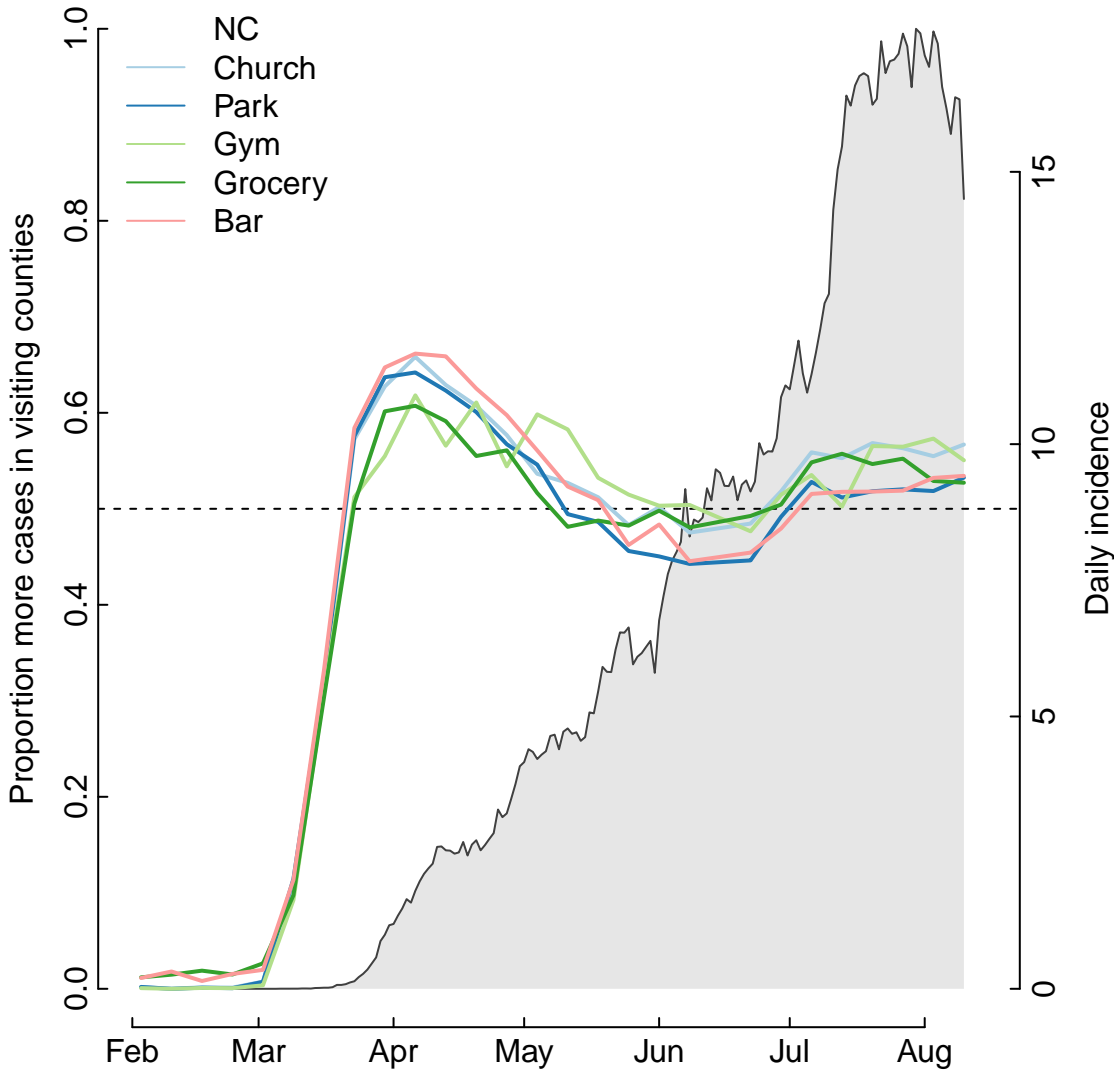

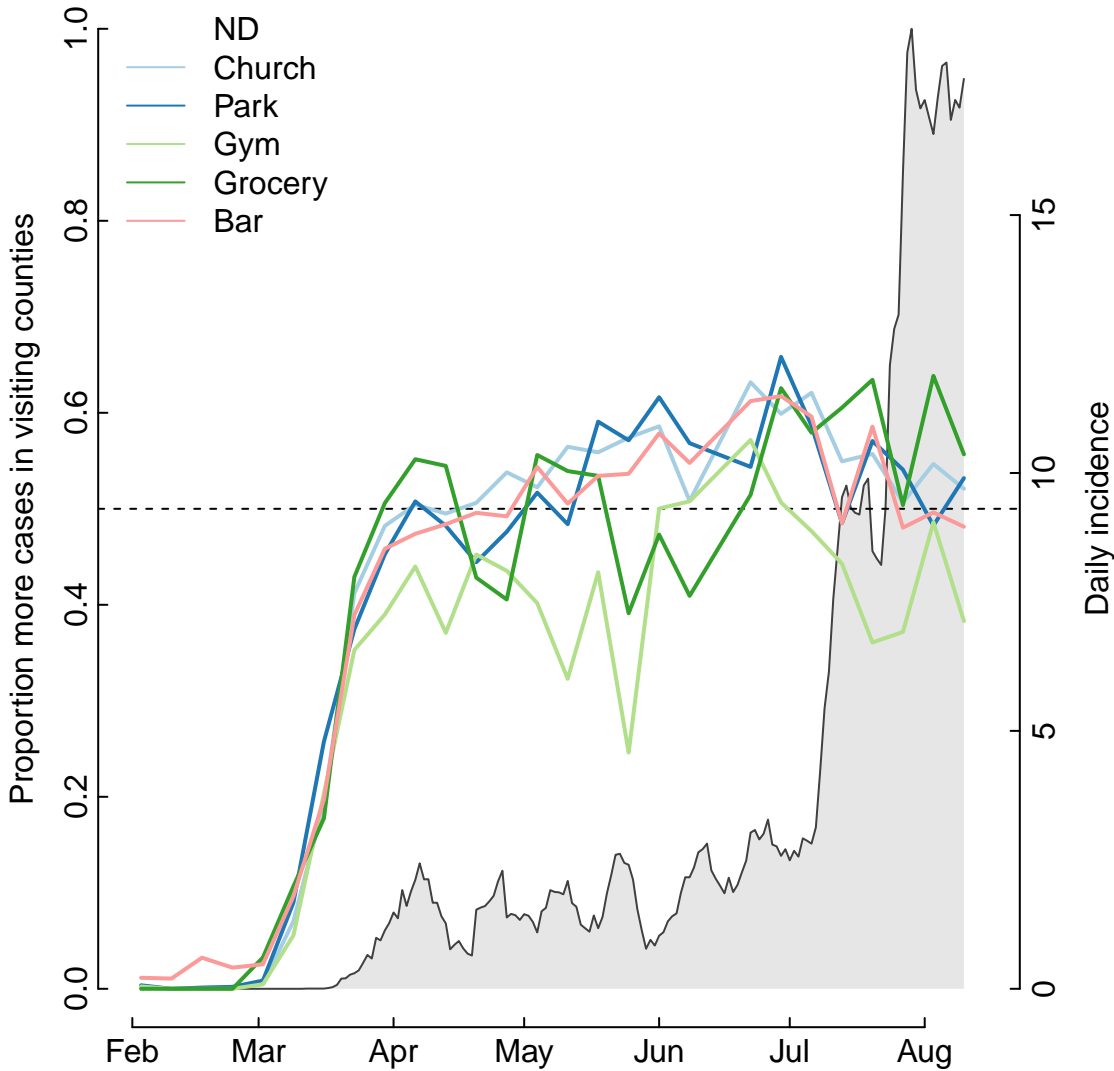

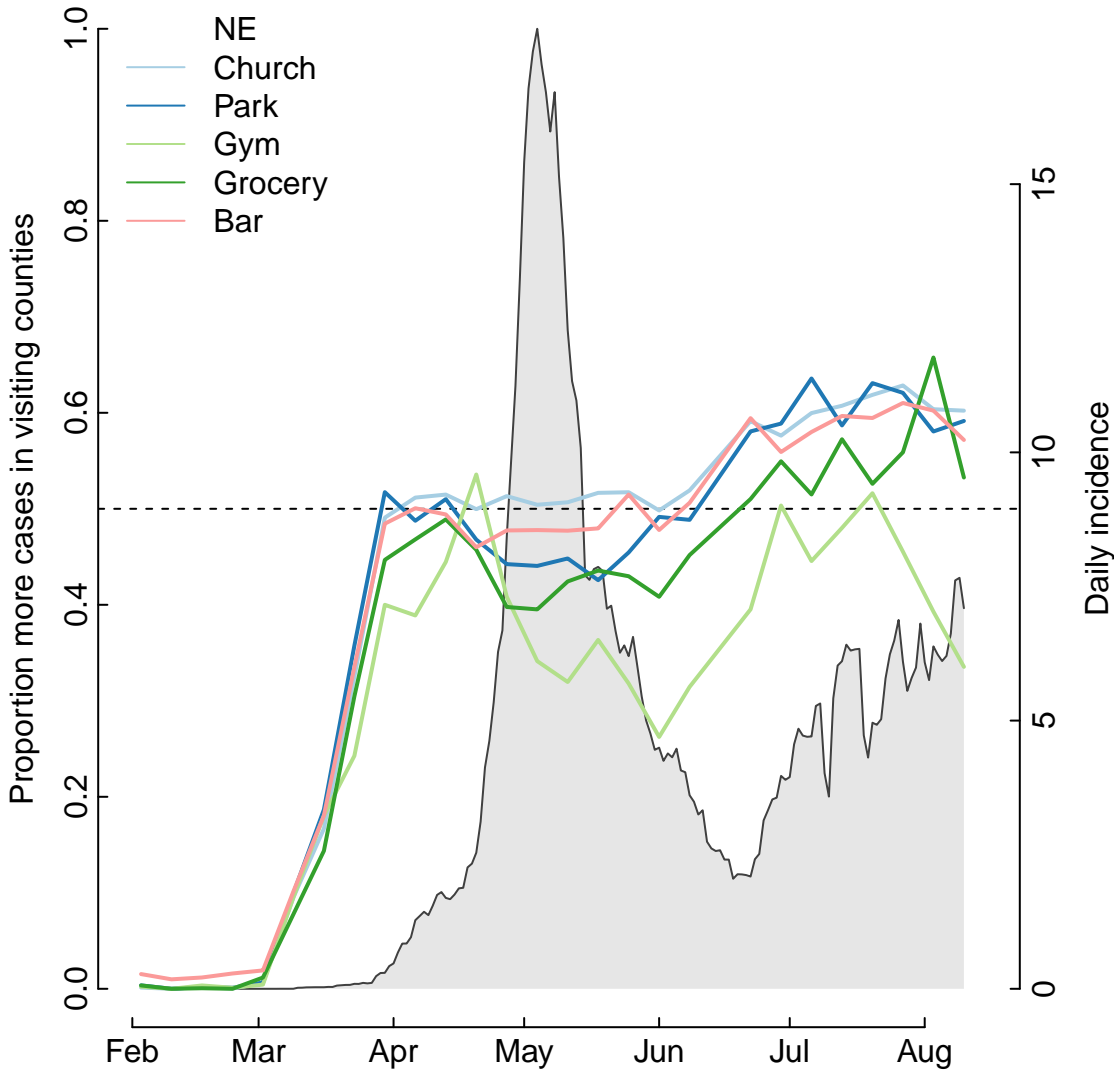

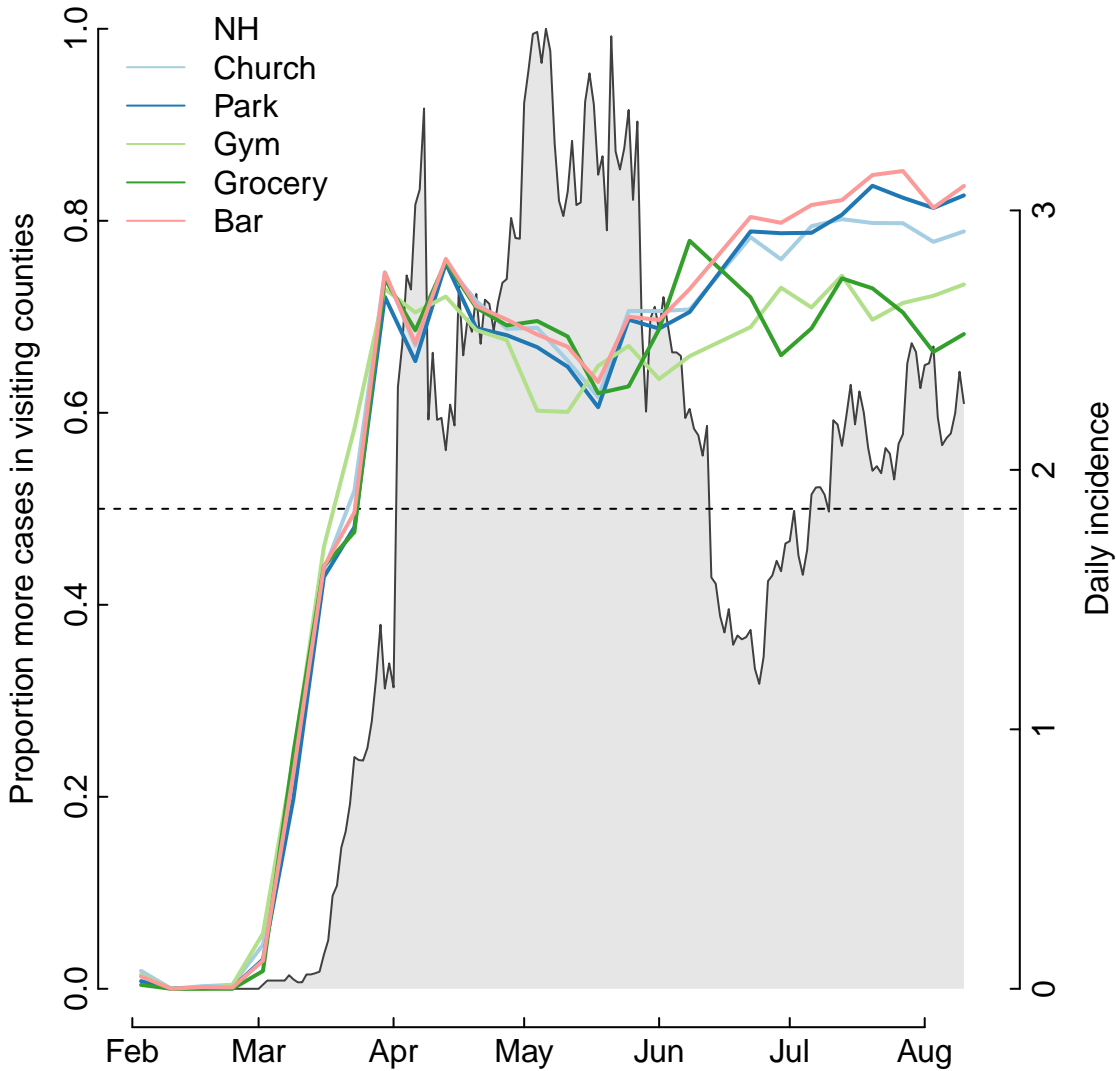

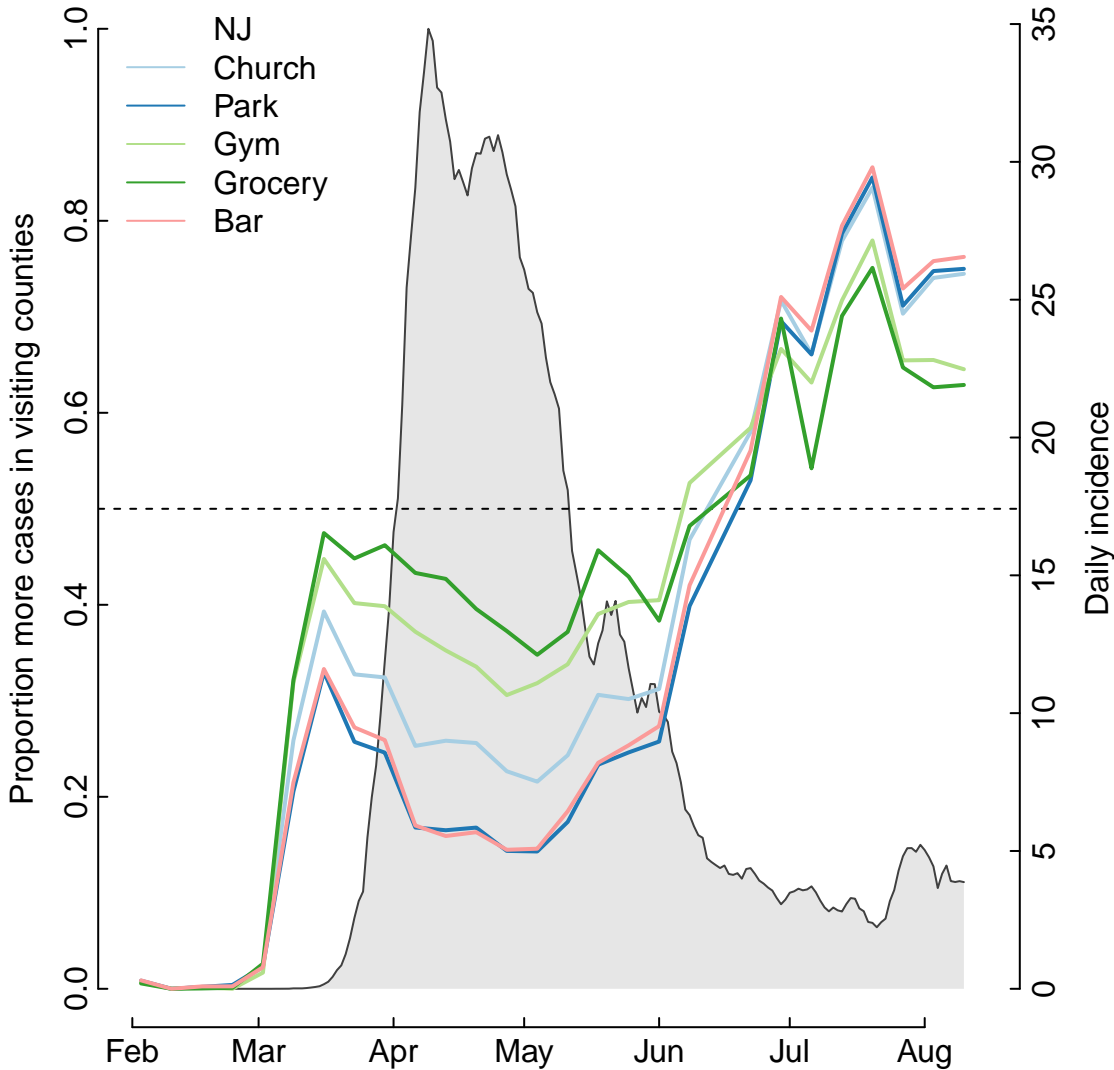



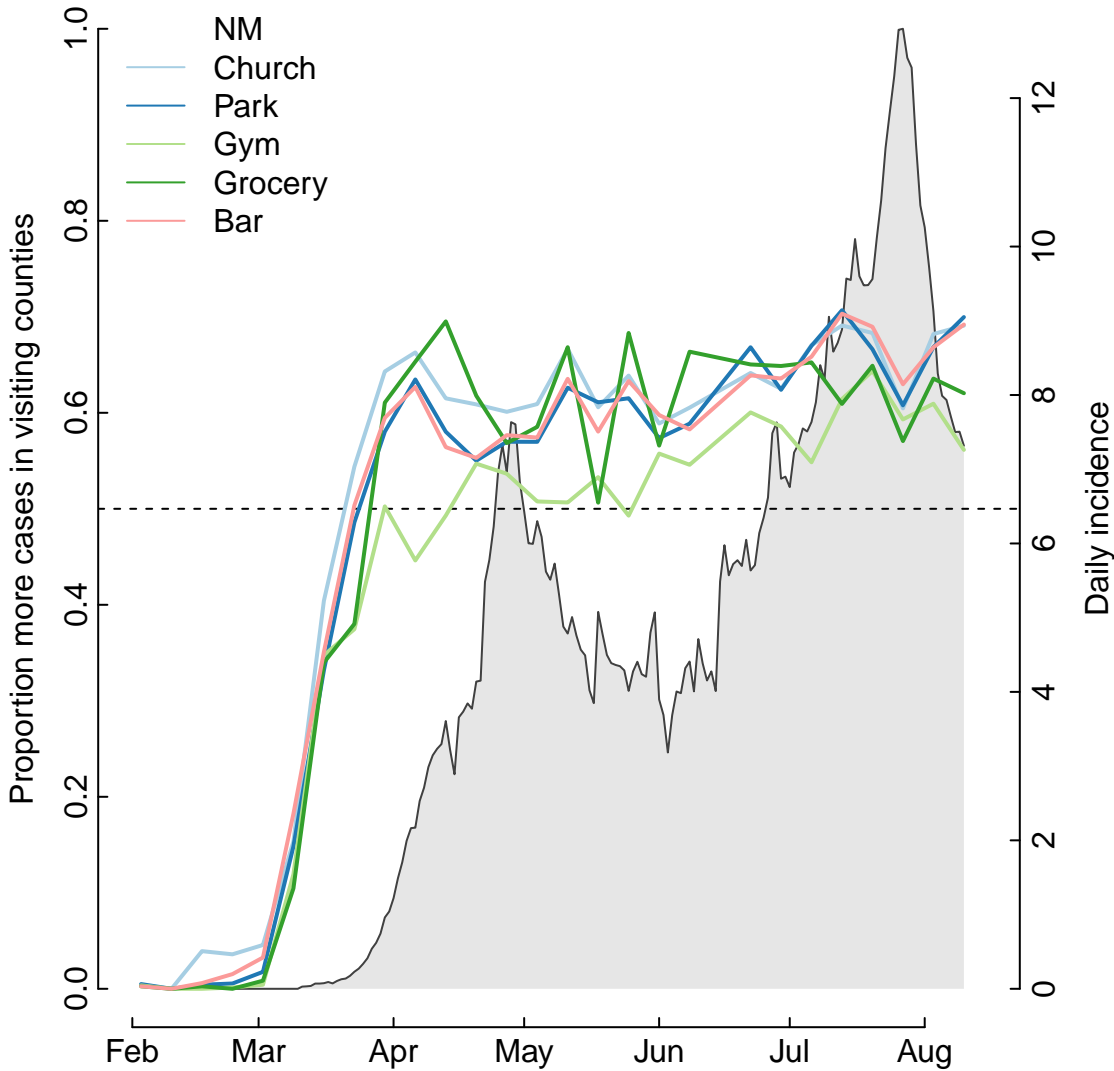

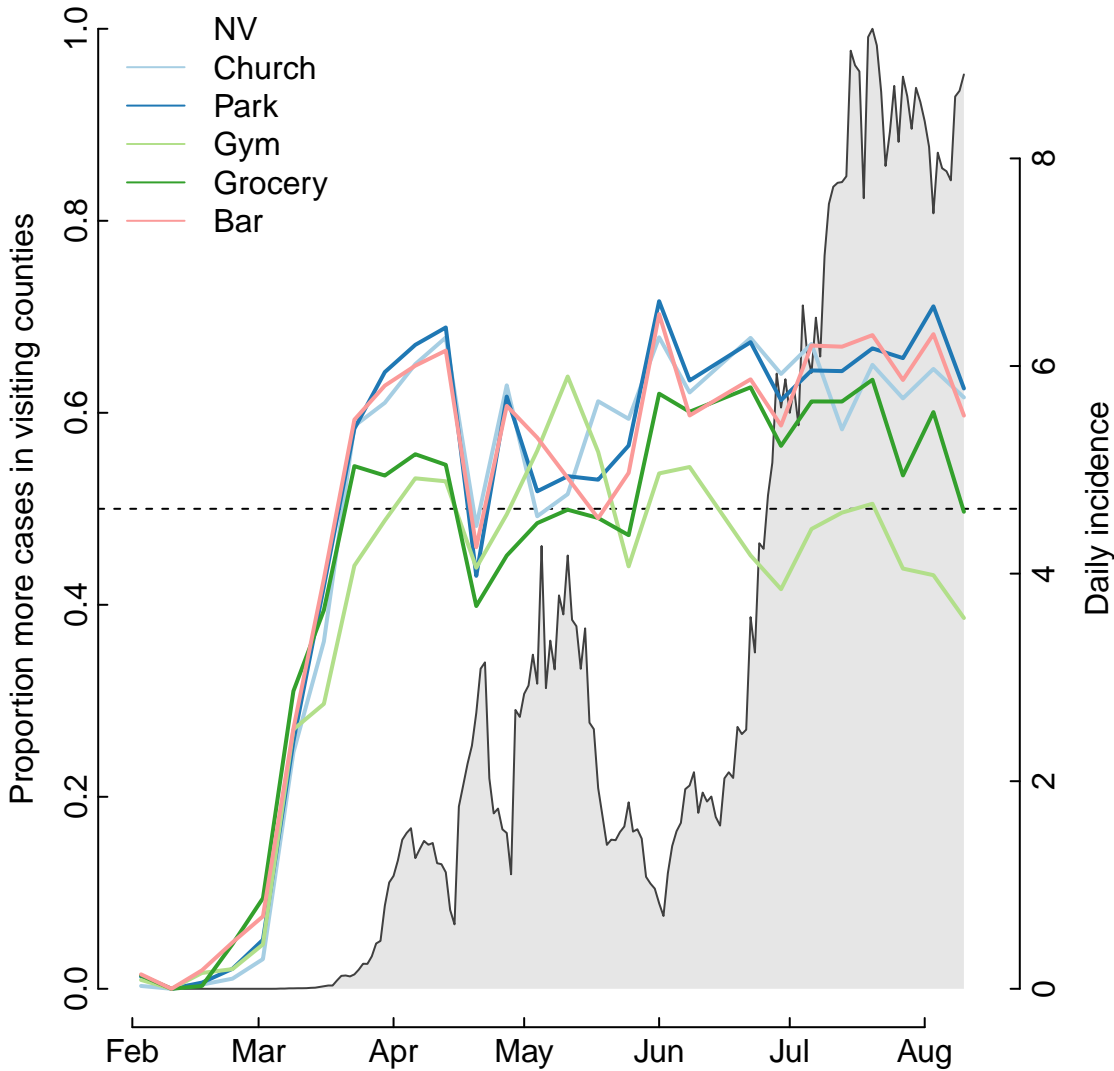

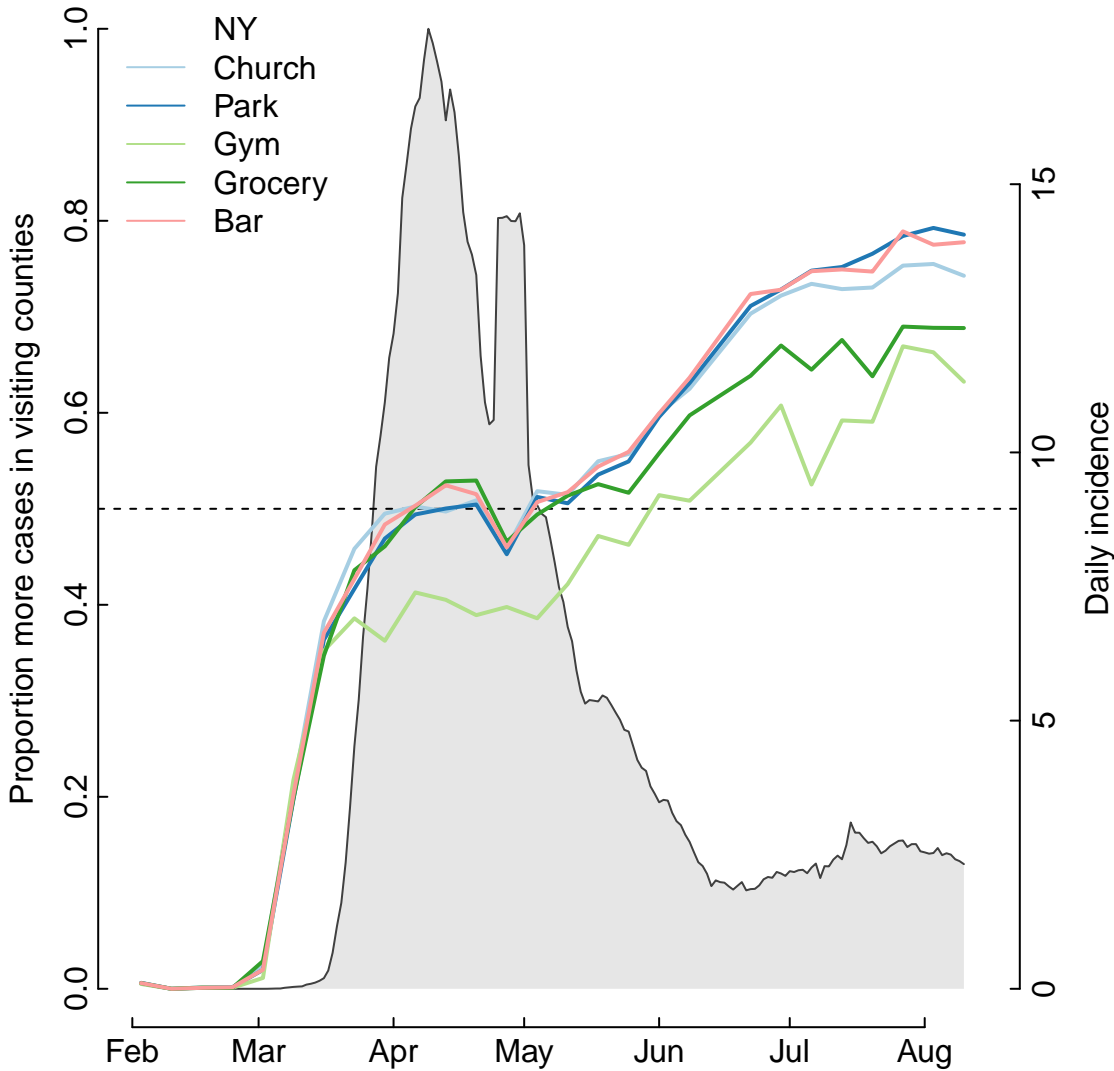

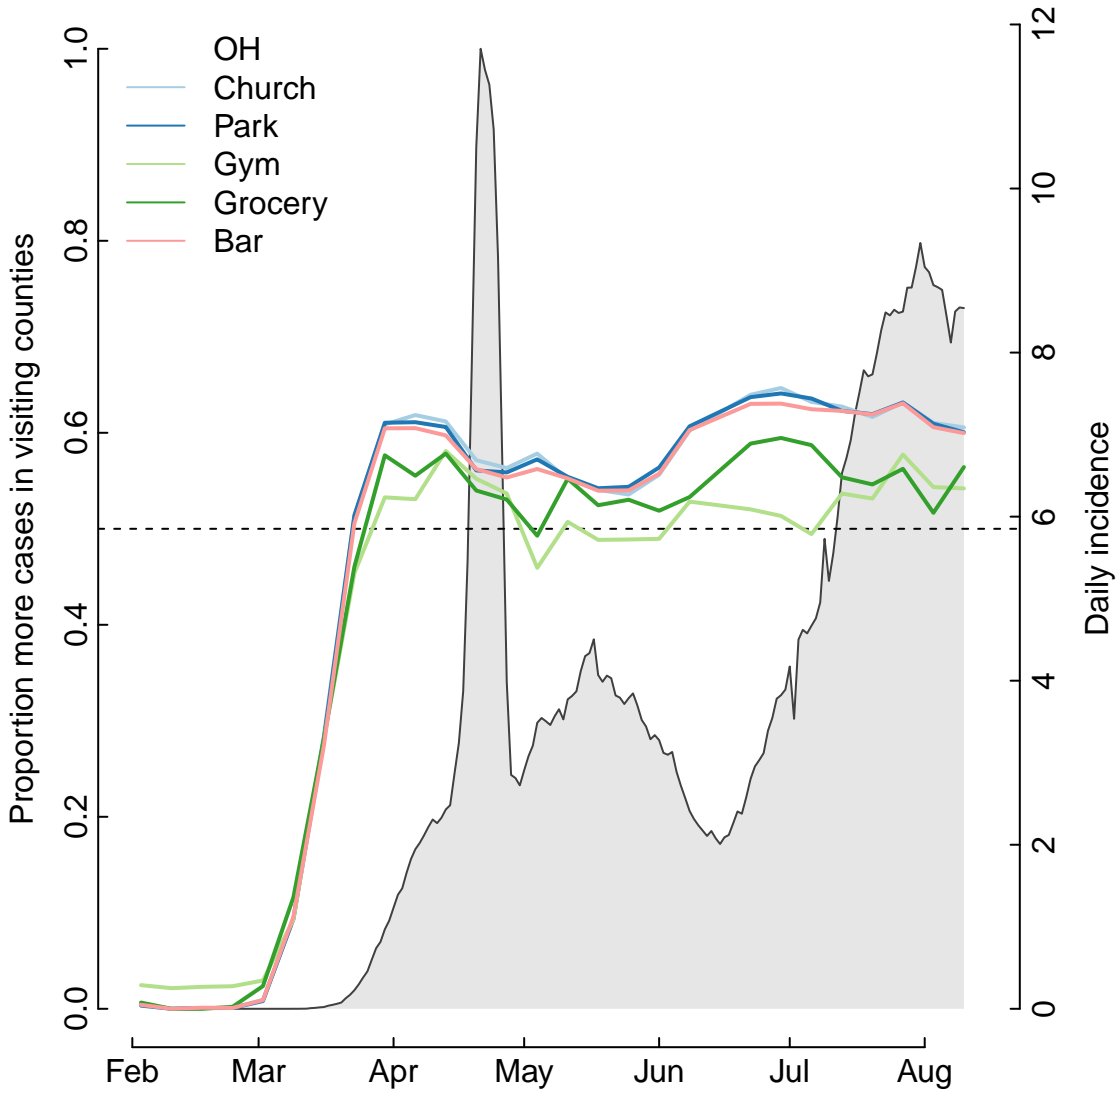



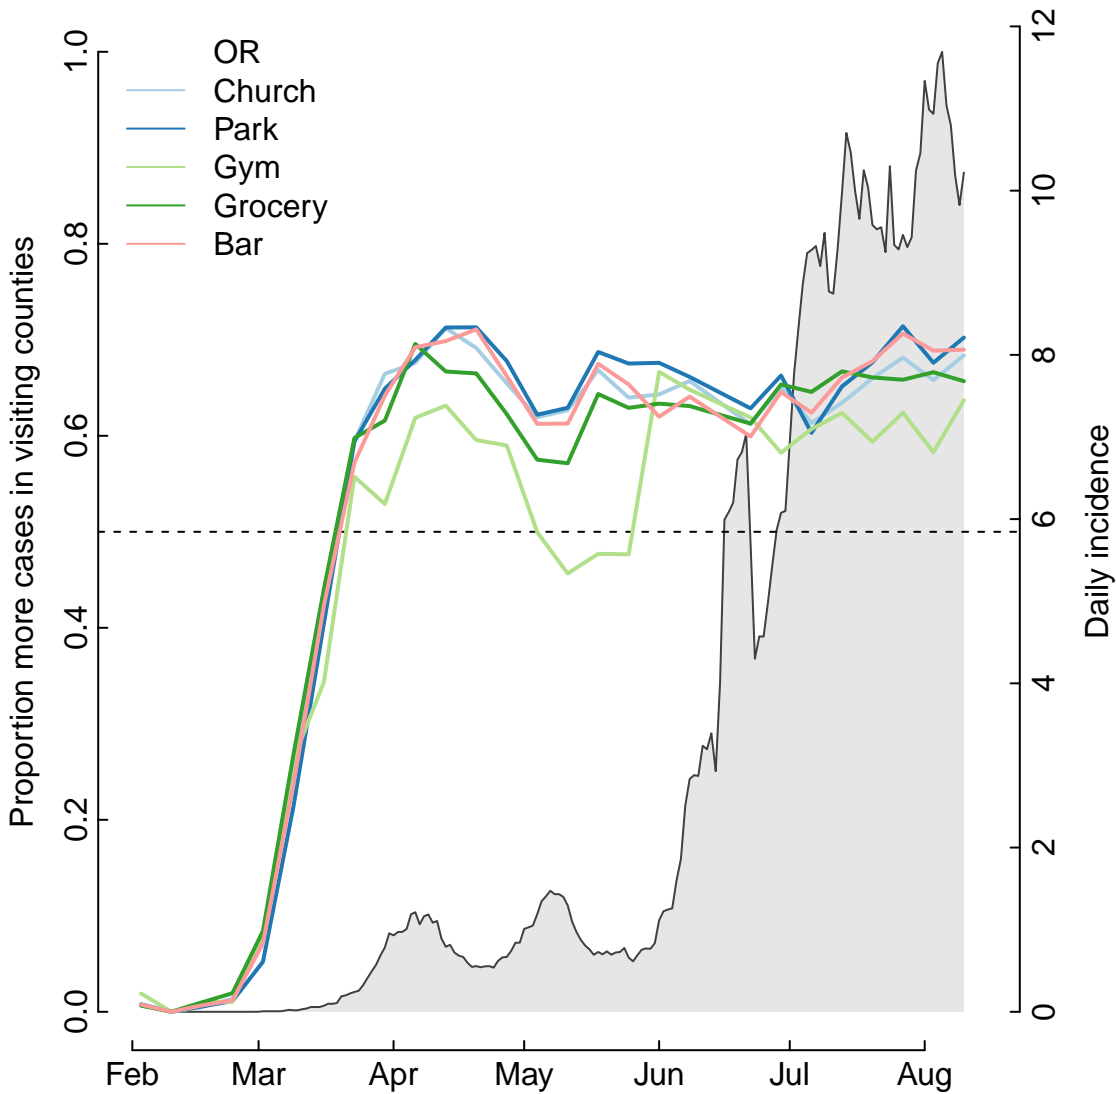

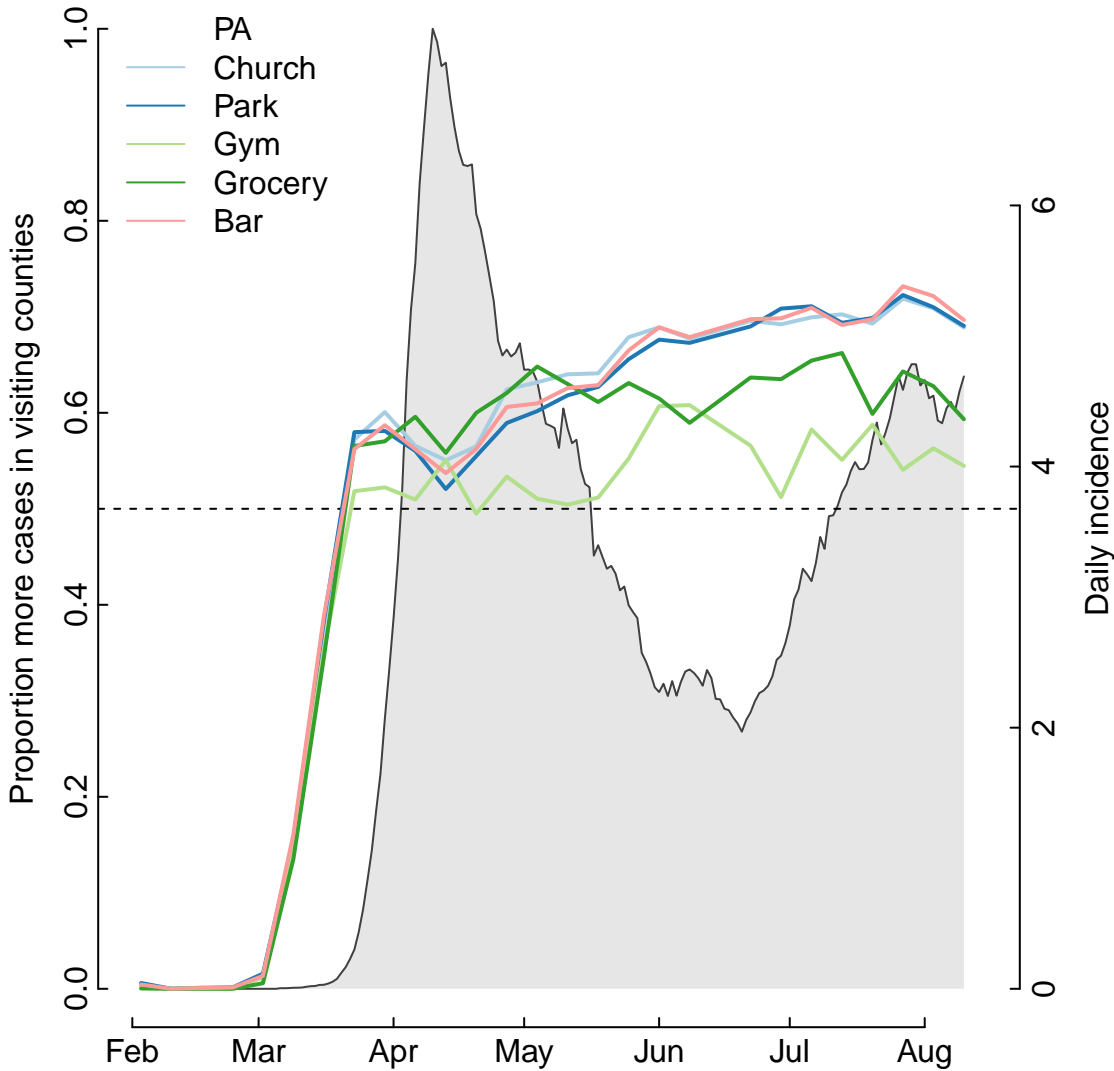





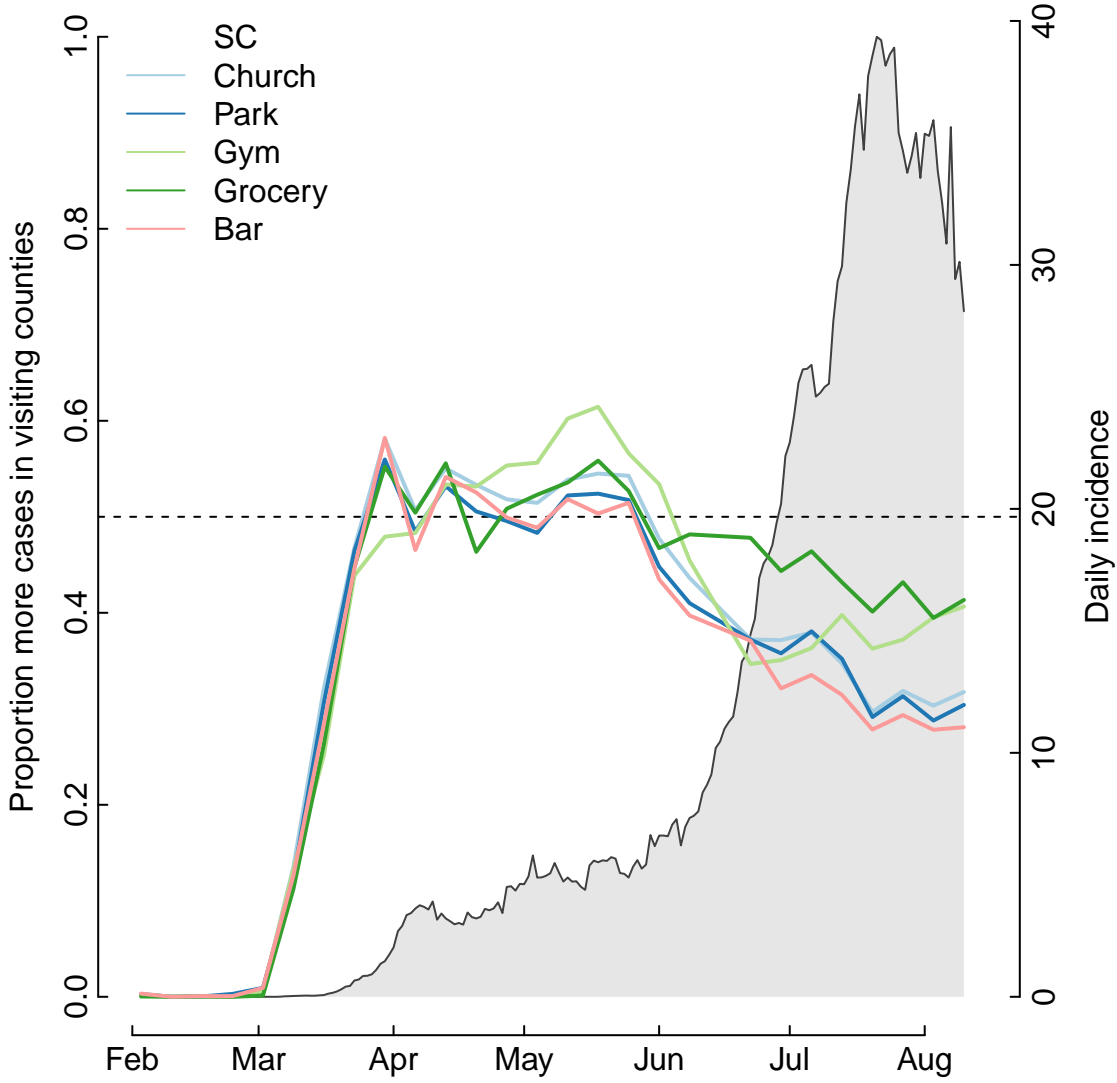

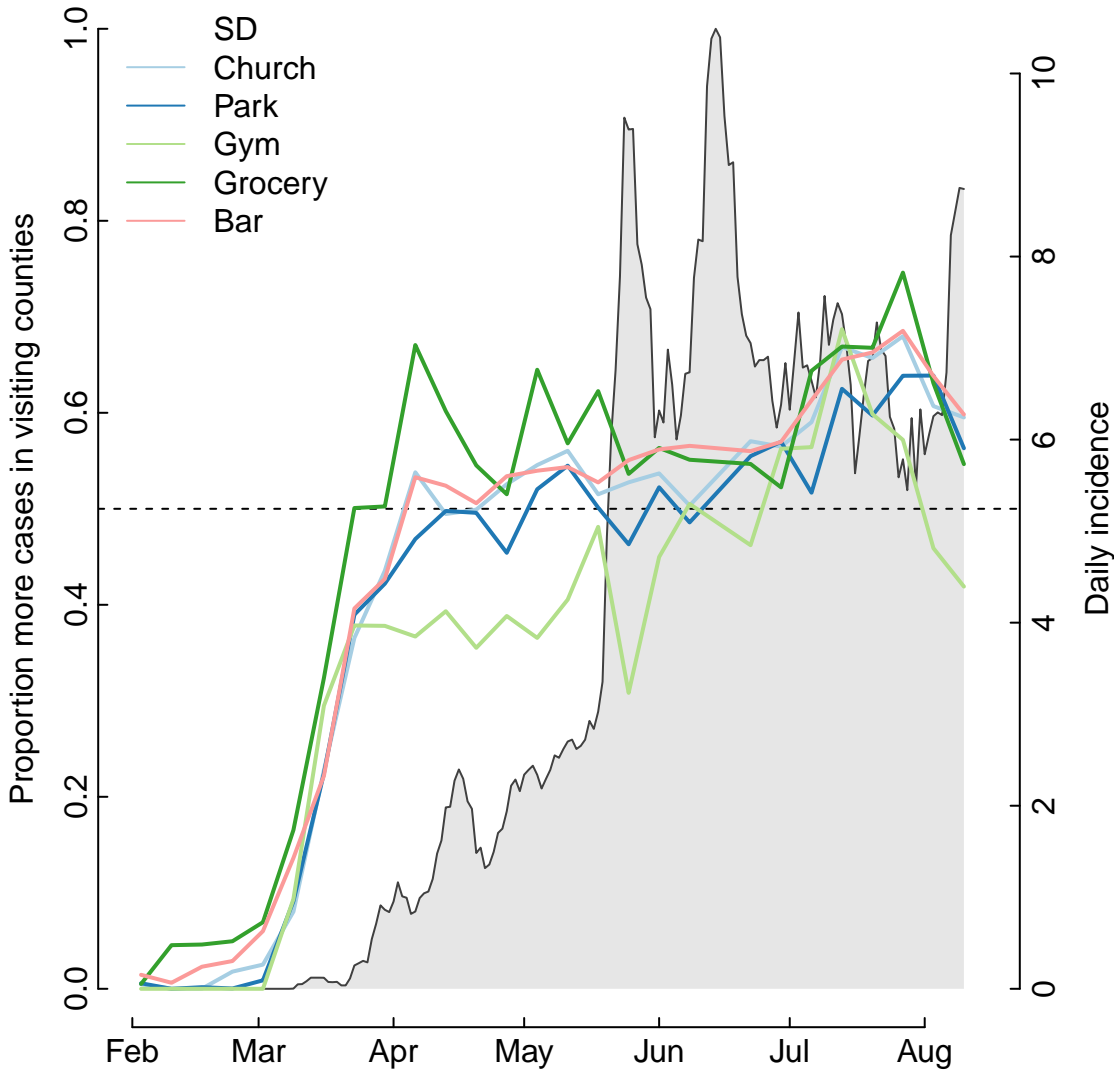

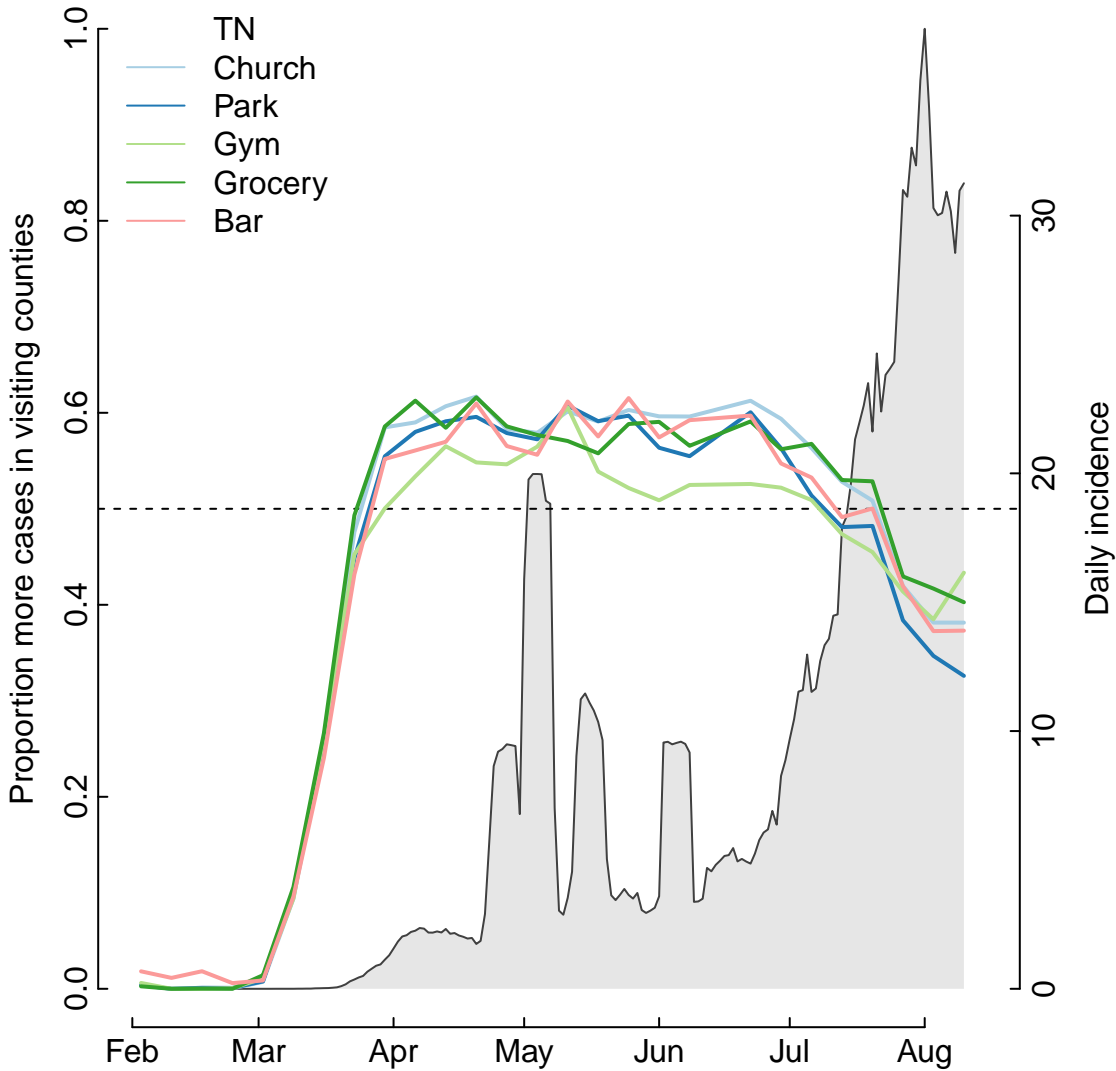

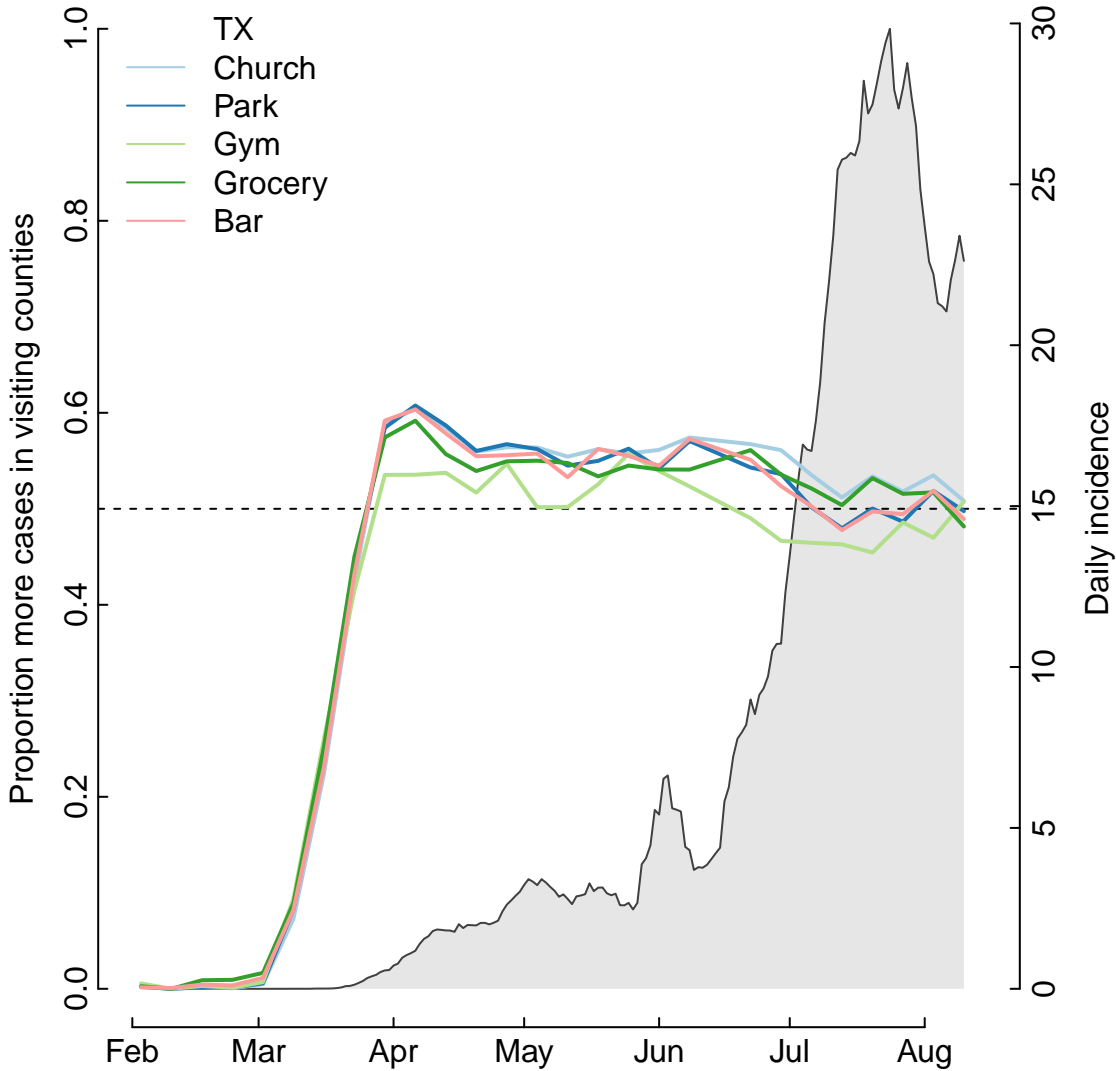



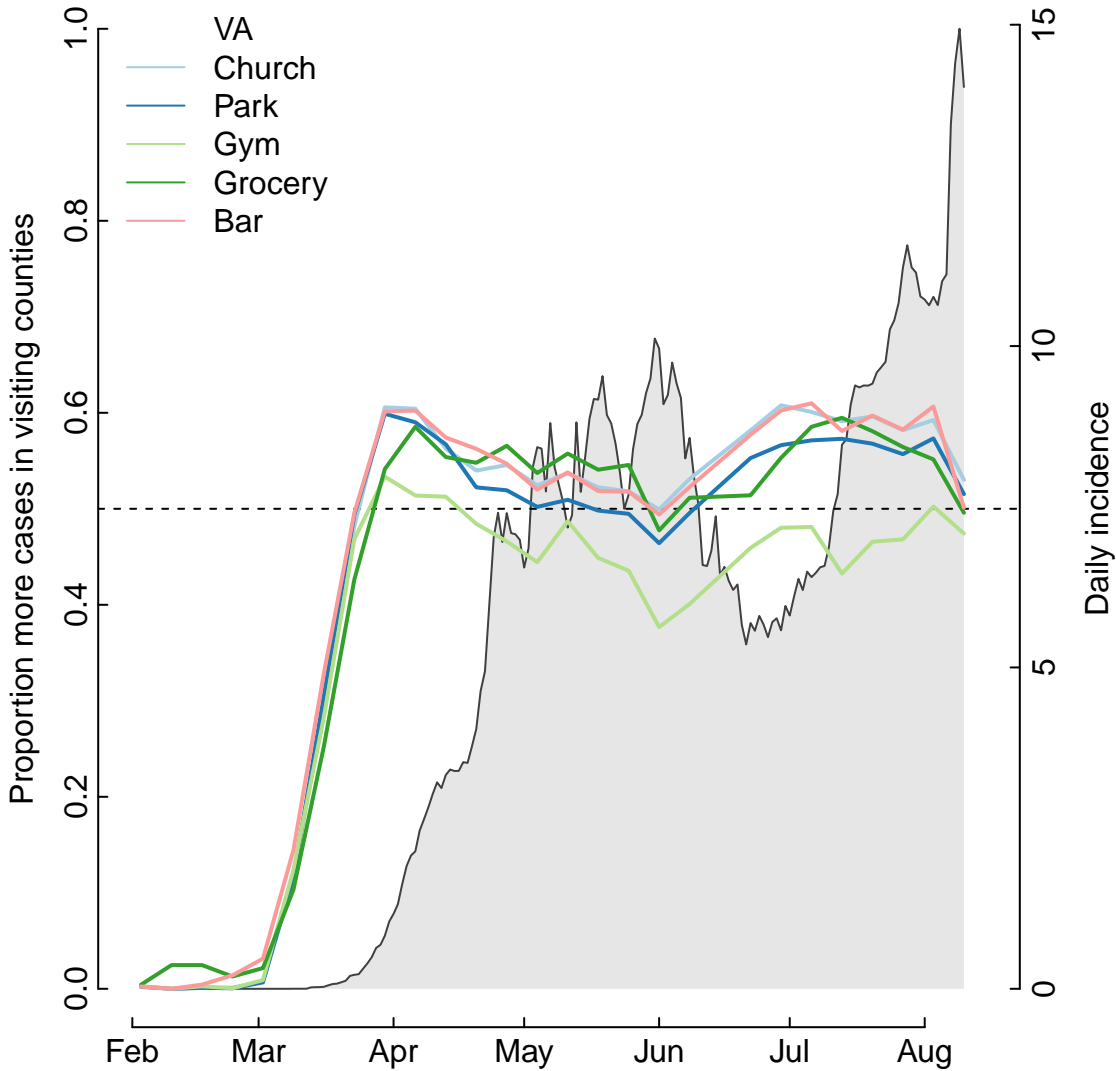







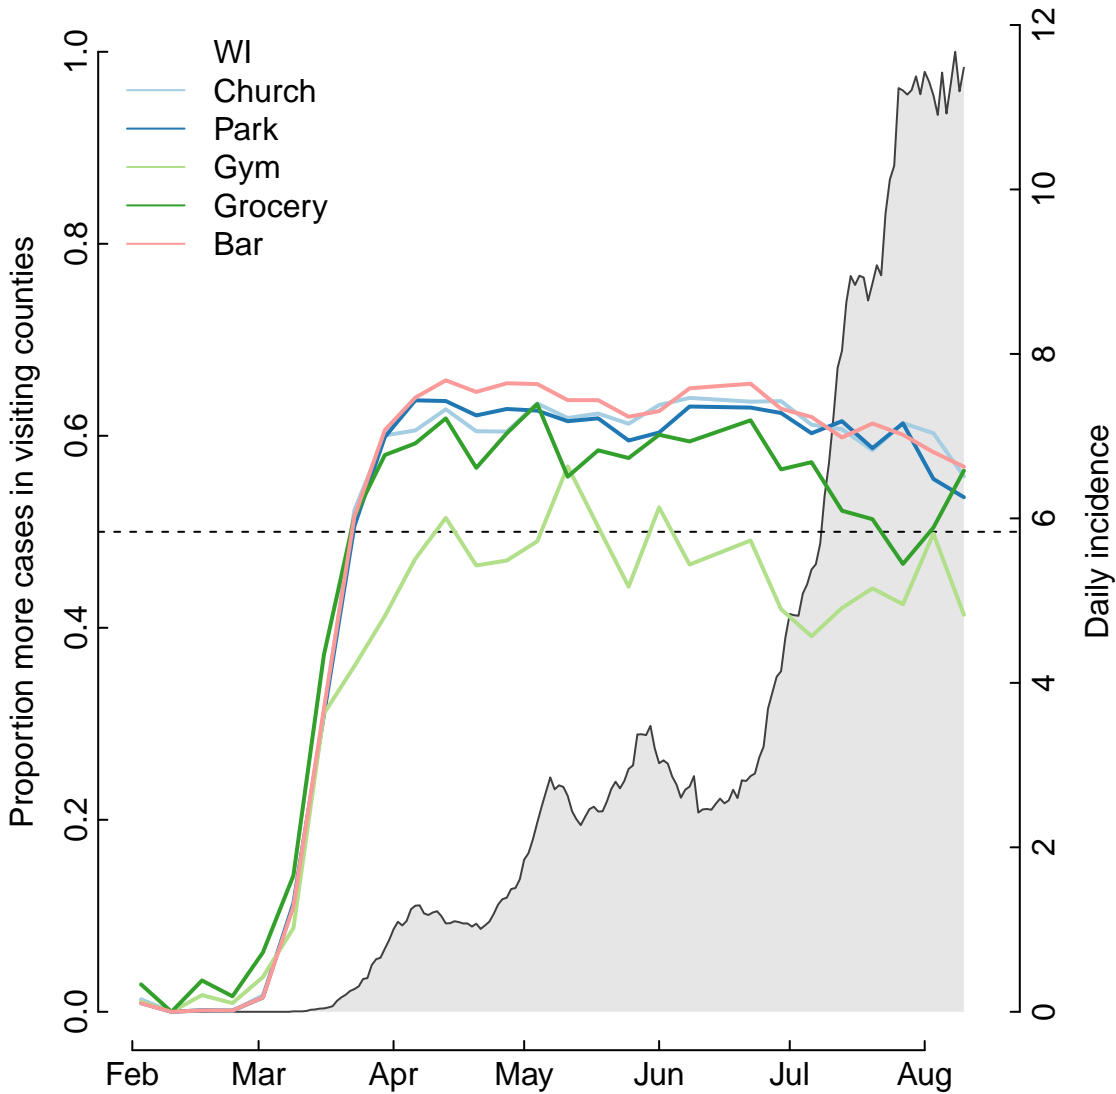

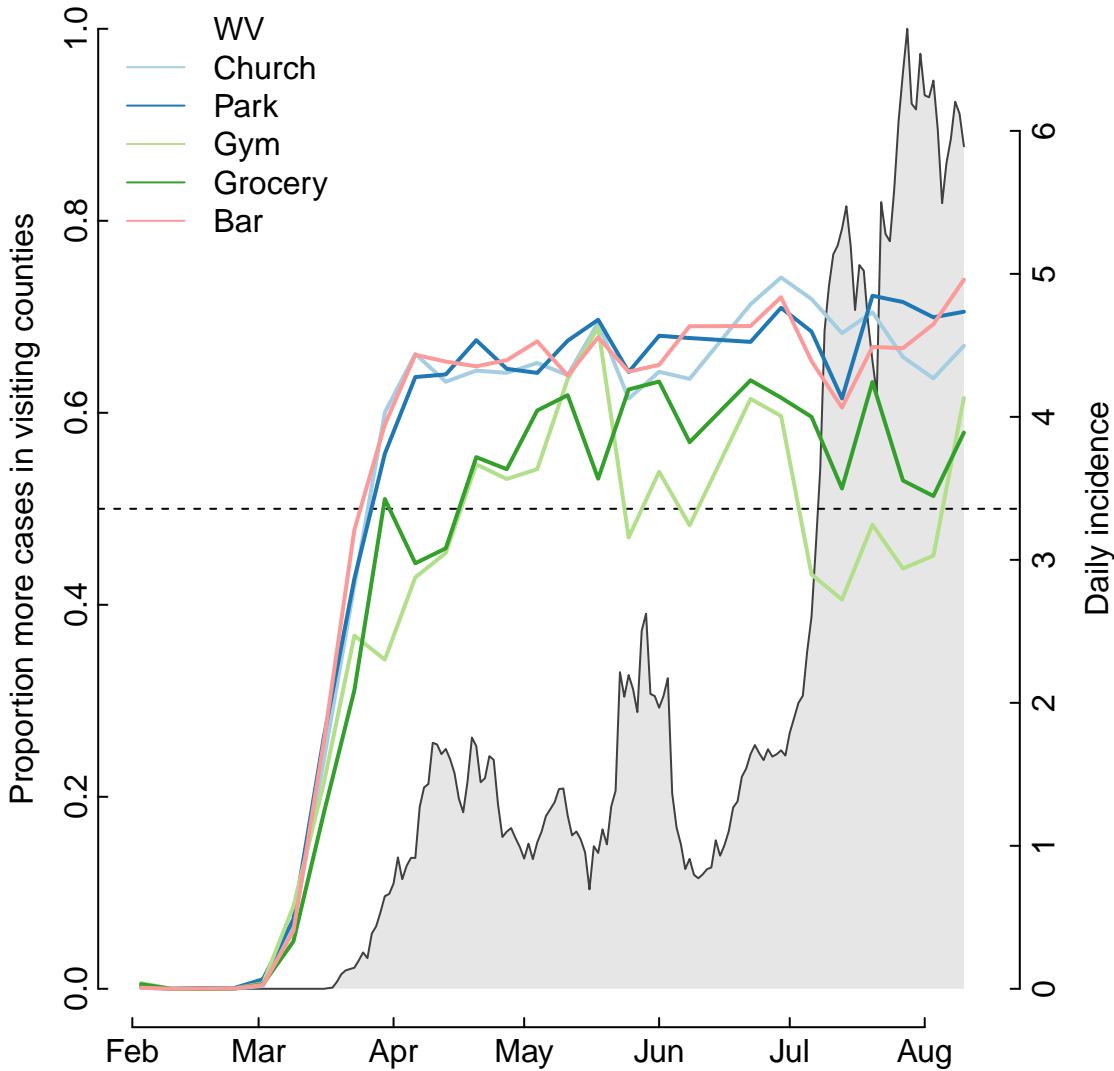

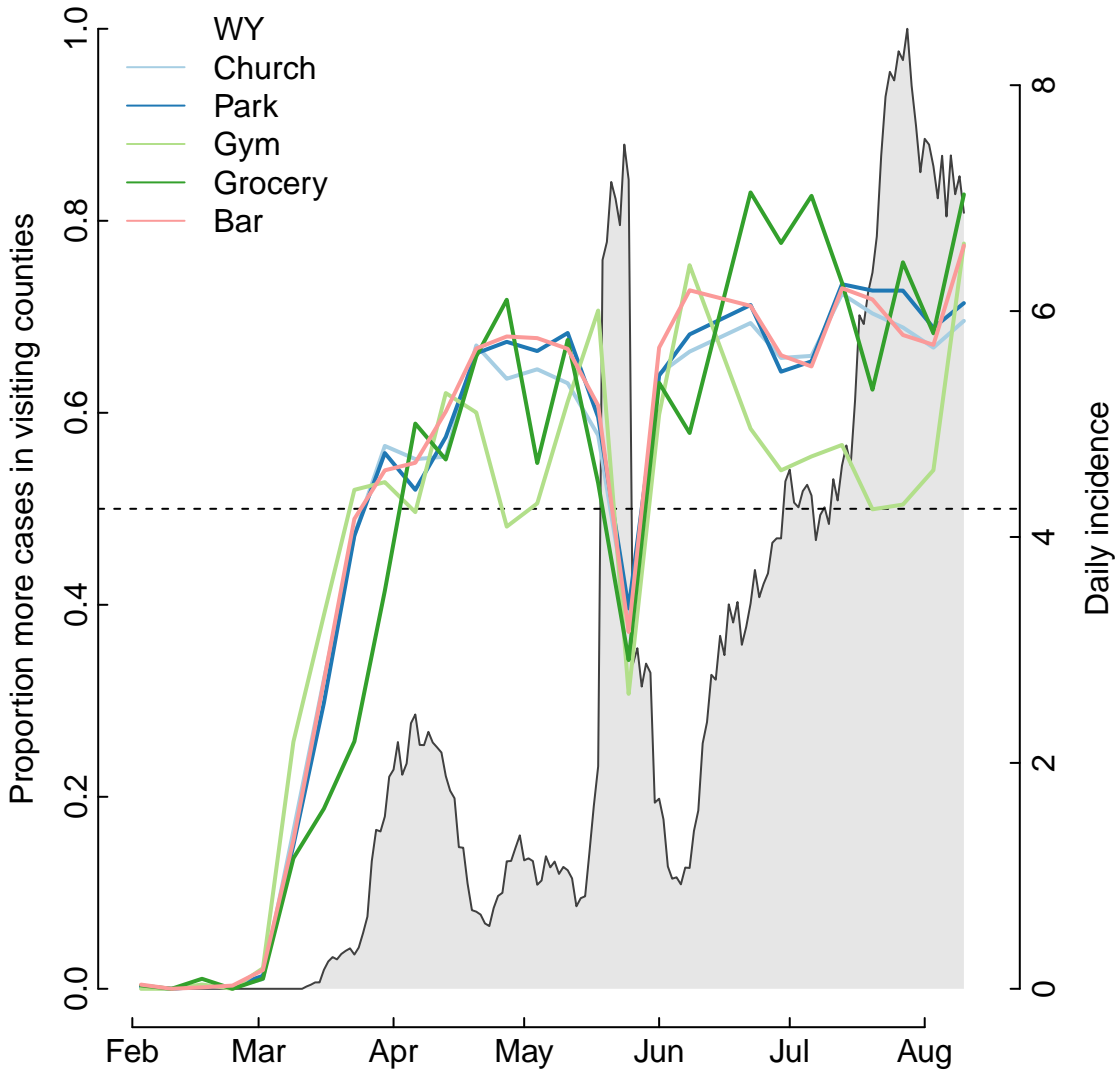

Supplement: Supplementary file [file media-3.pdf]
