# Supplementary material for: The unintended consequences of inconsistent pandemic control policies
Source: bioRxiv or medRxiv preprint supplement (doi:10.1101/2020.08.21.20179473), 2020-10-28

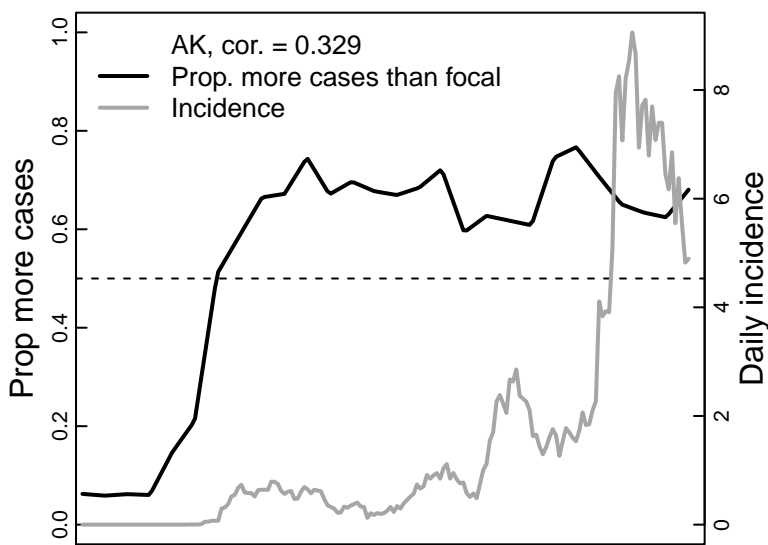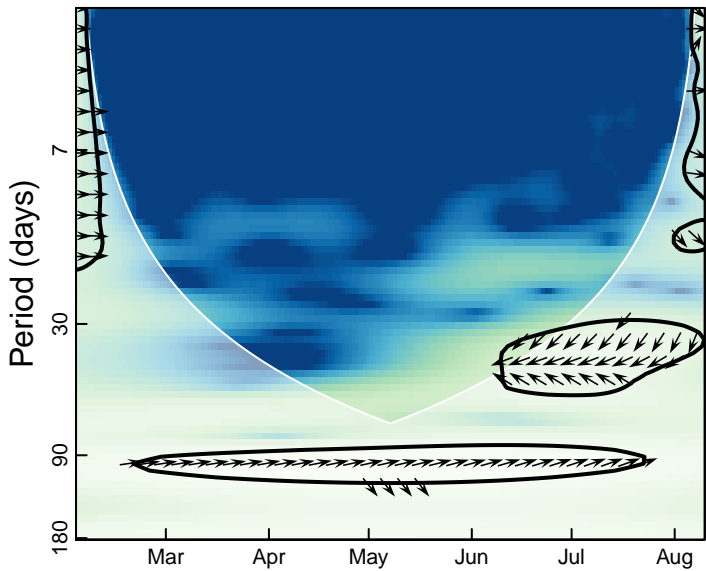

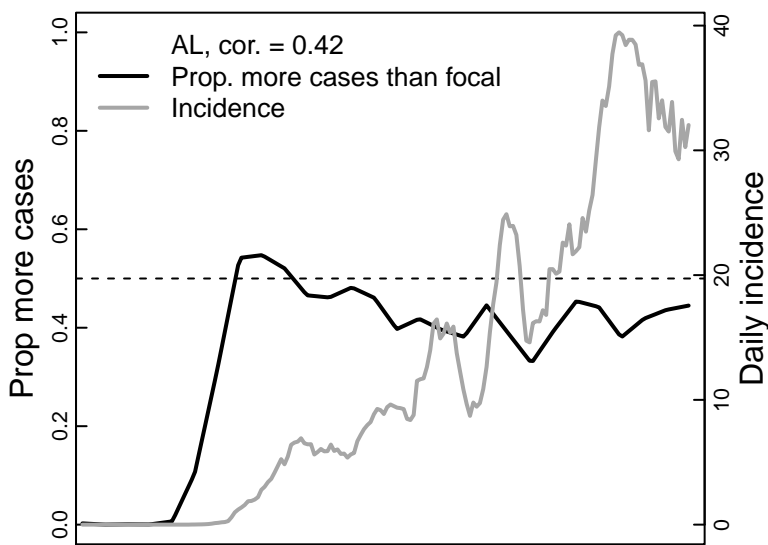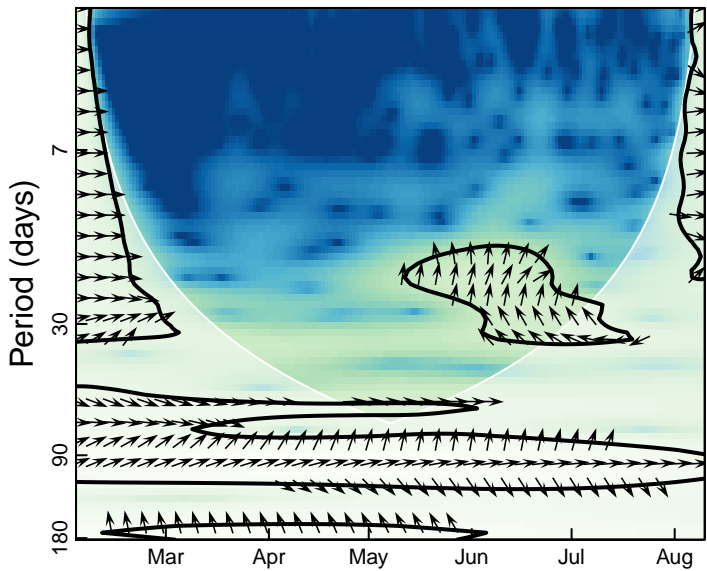

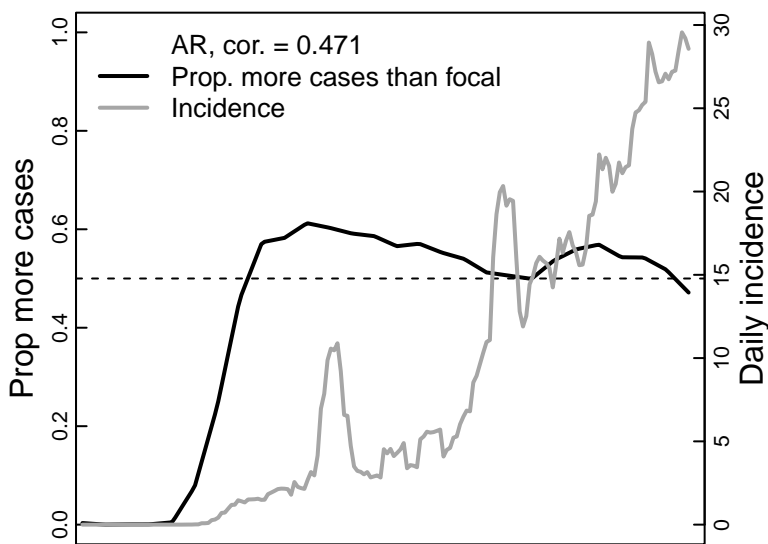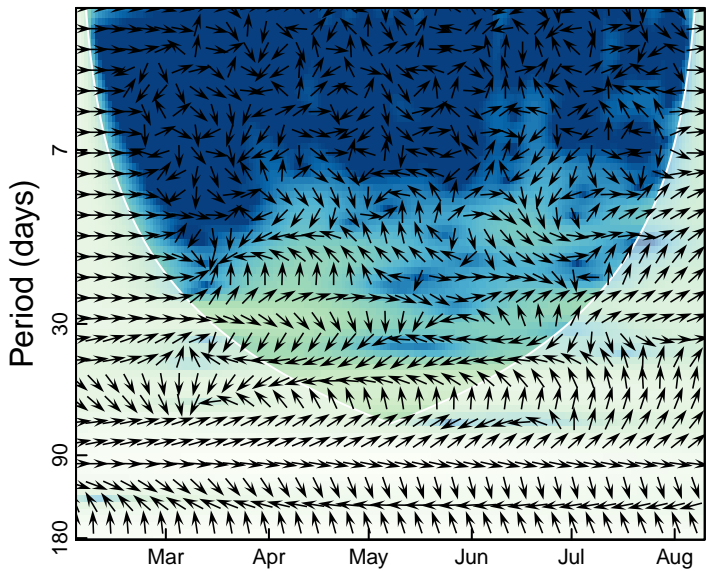

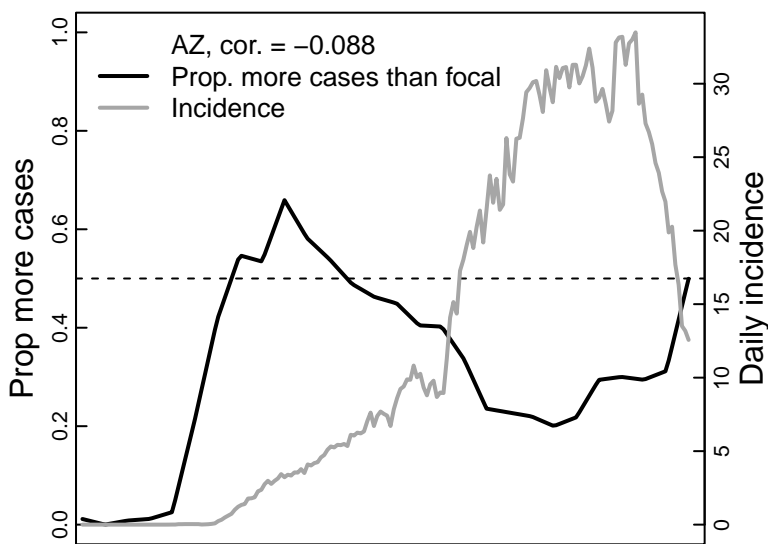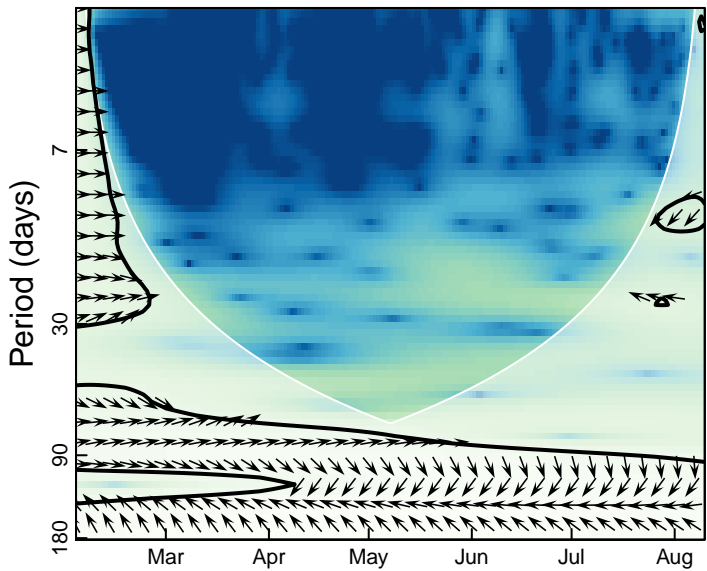

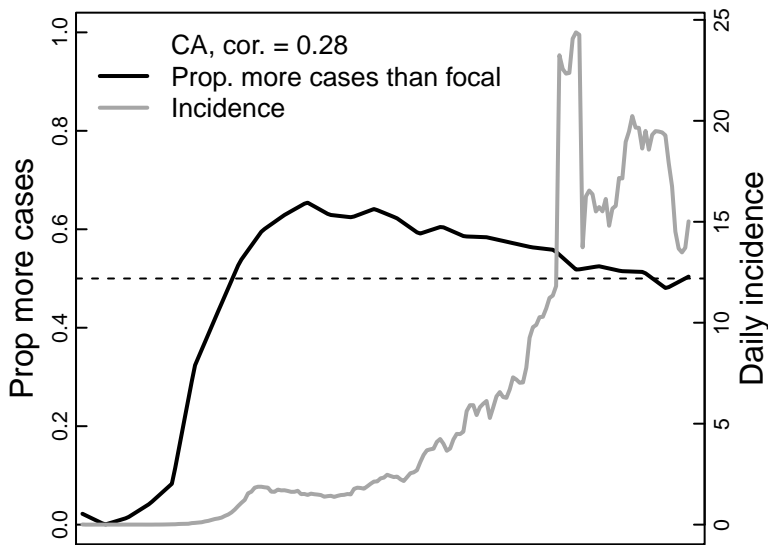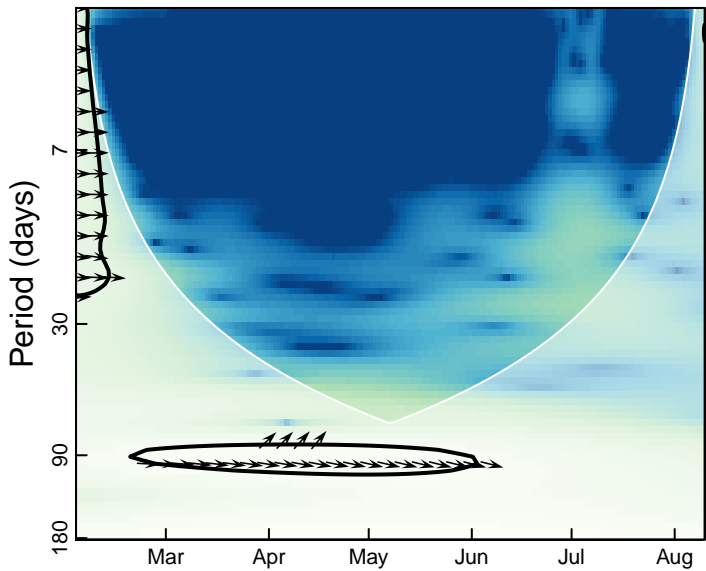

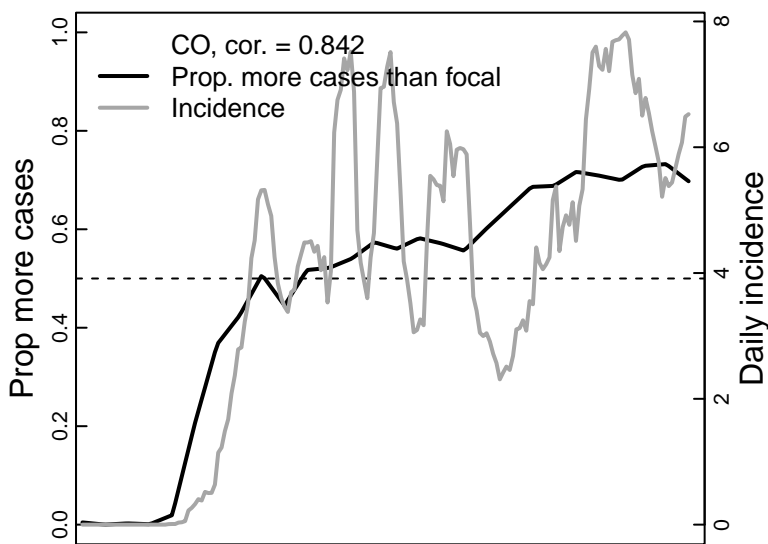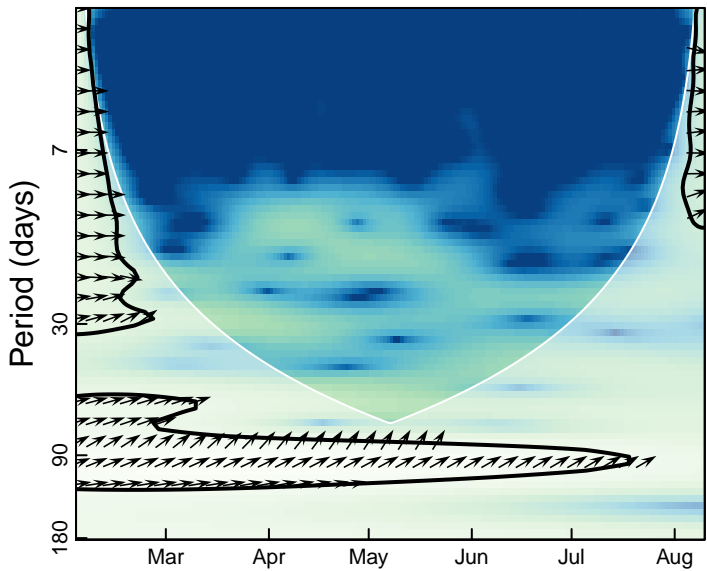

Prop more cases

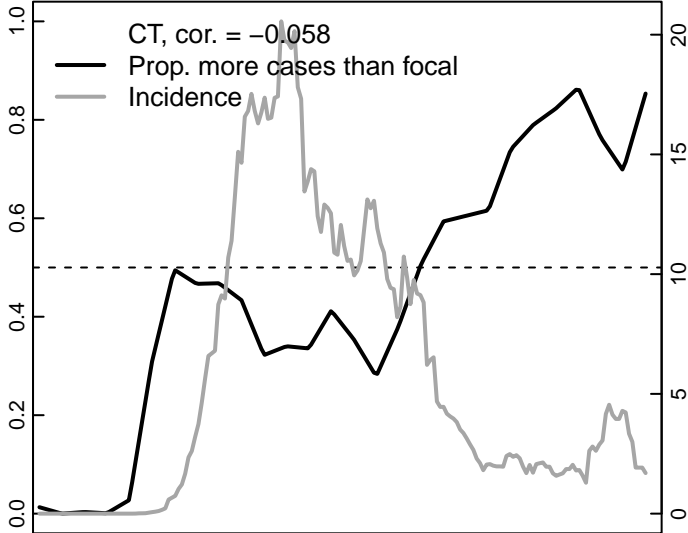

Period (days)

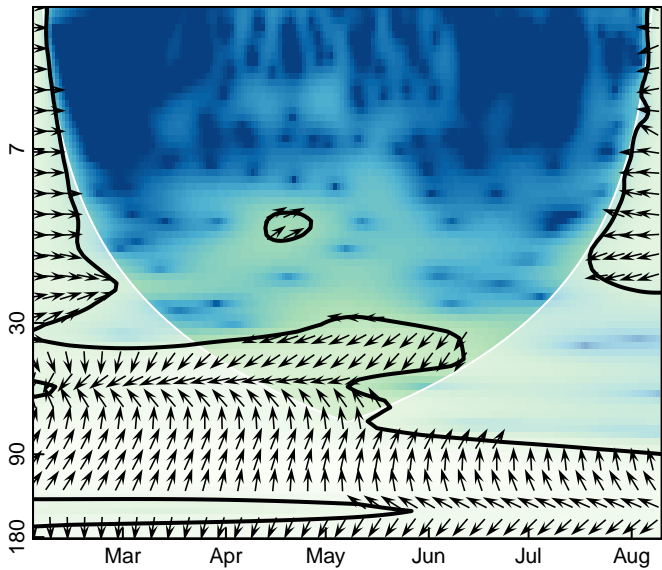

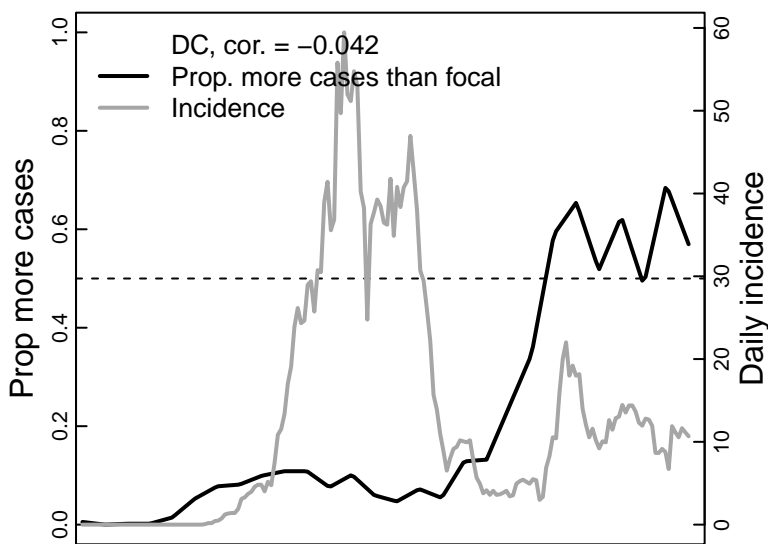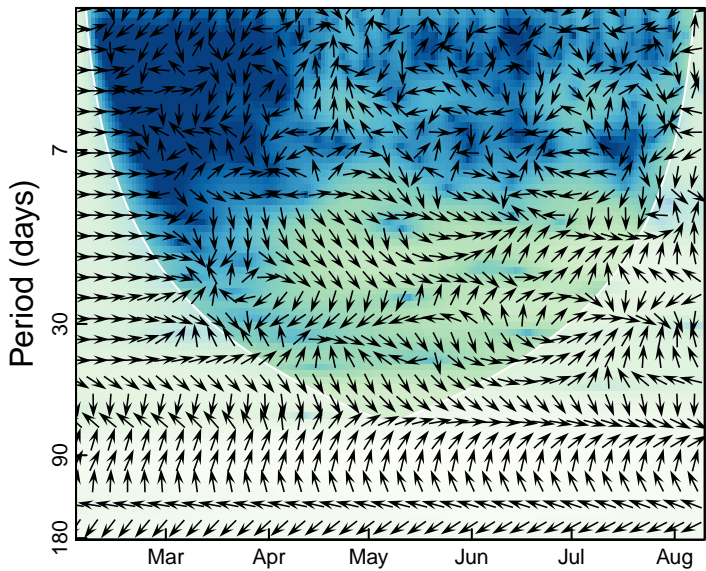



Prop more cases

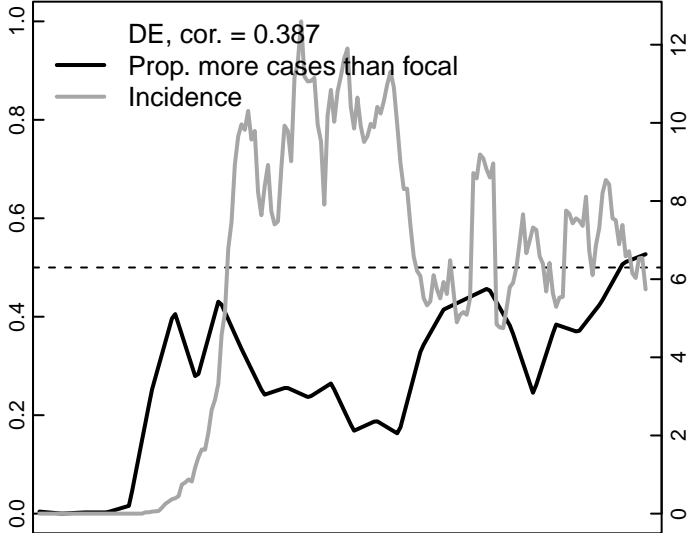

Period (days)

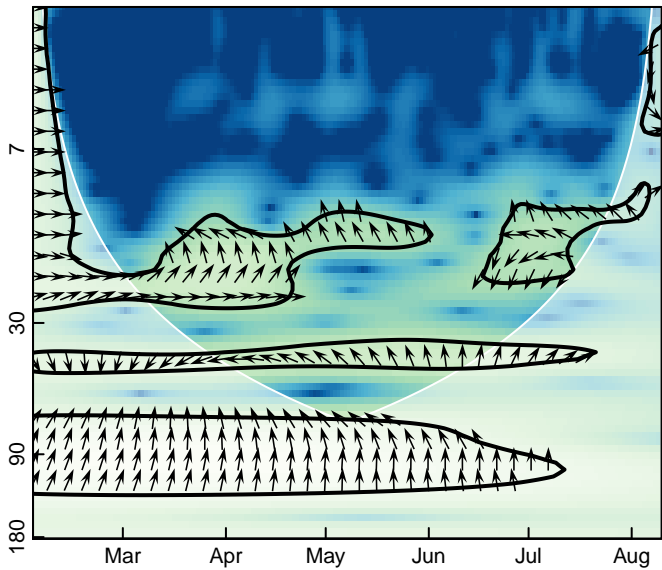

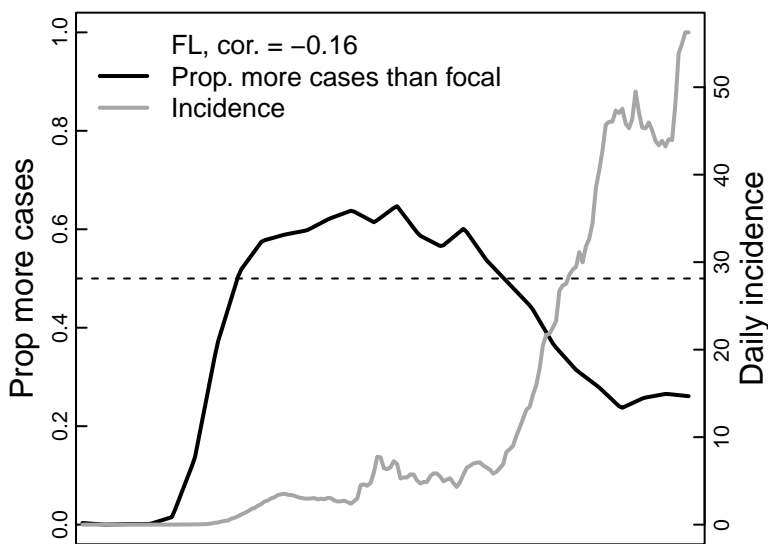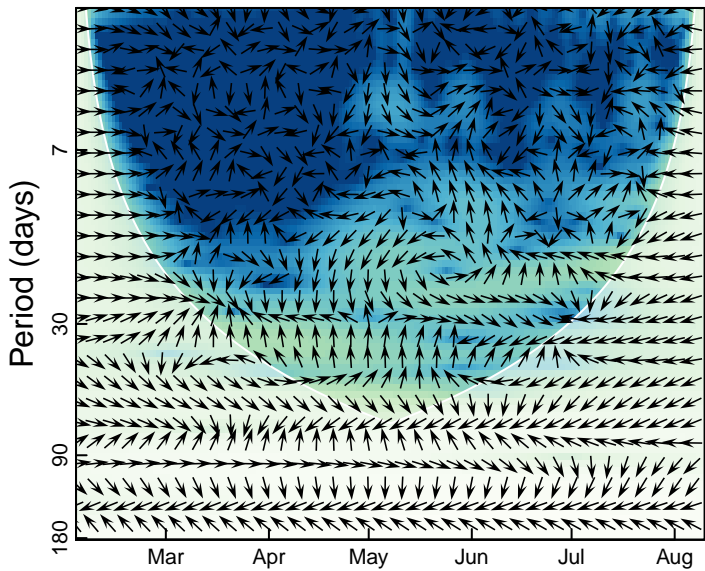

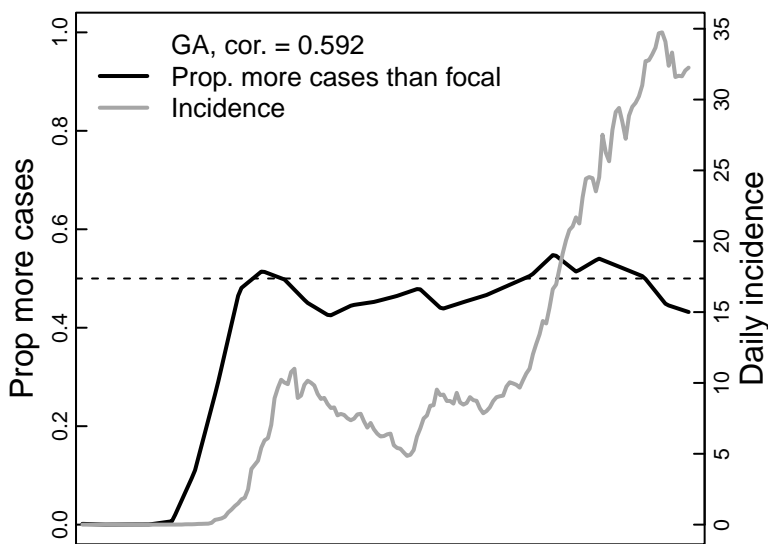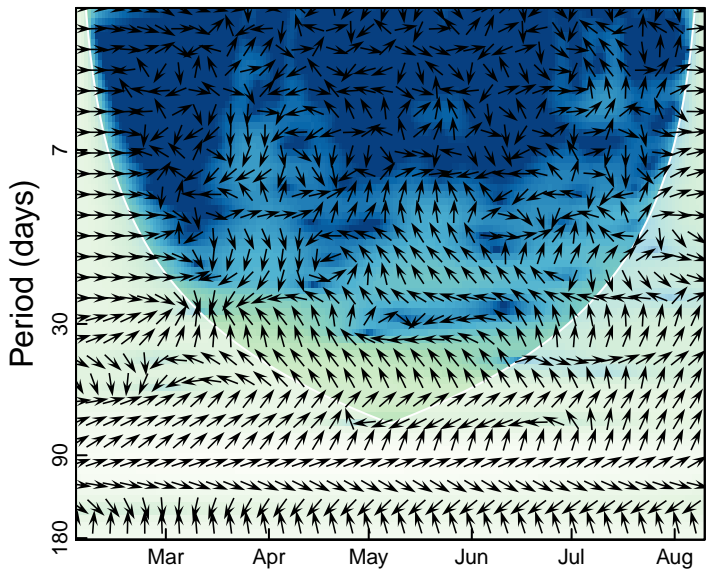

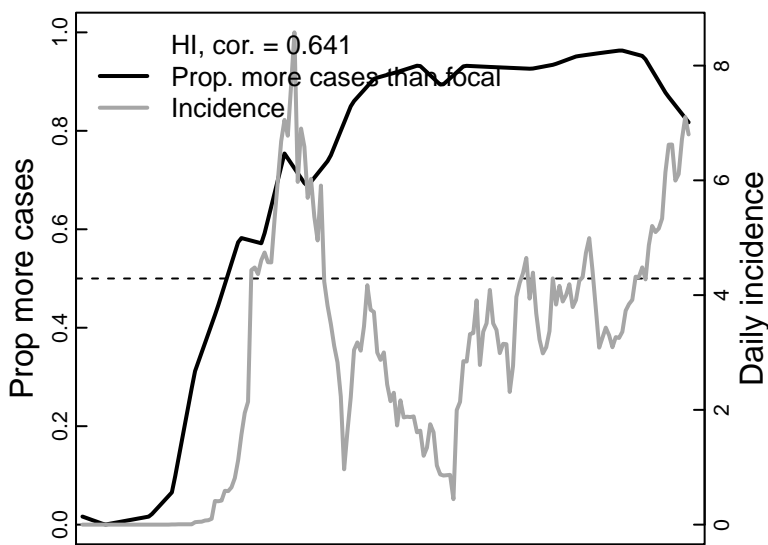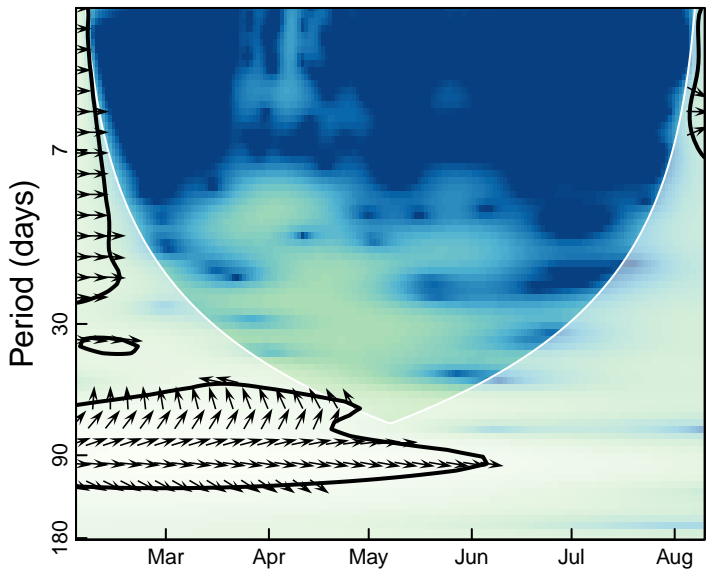

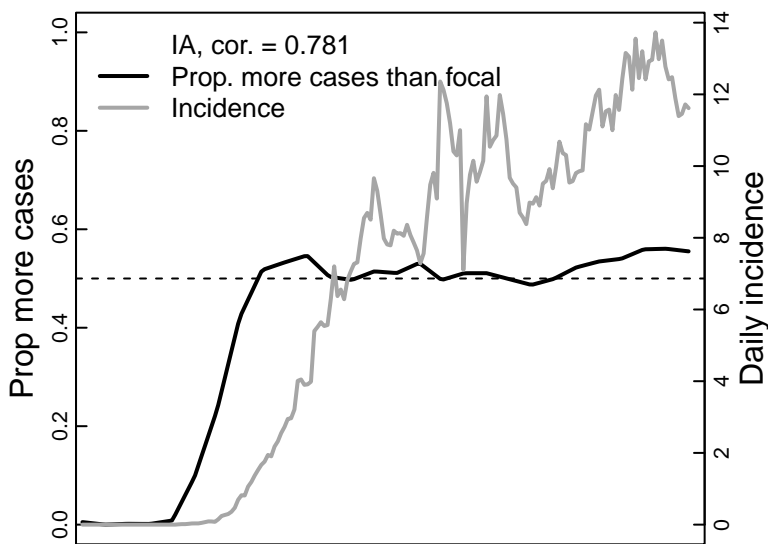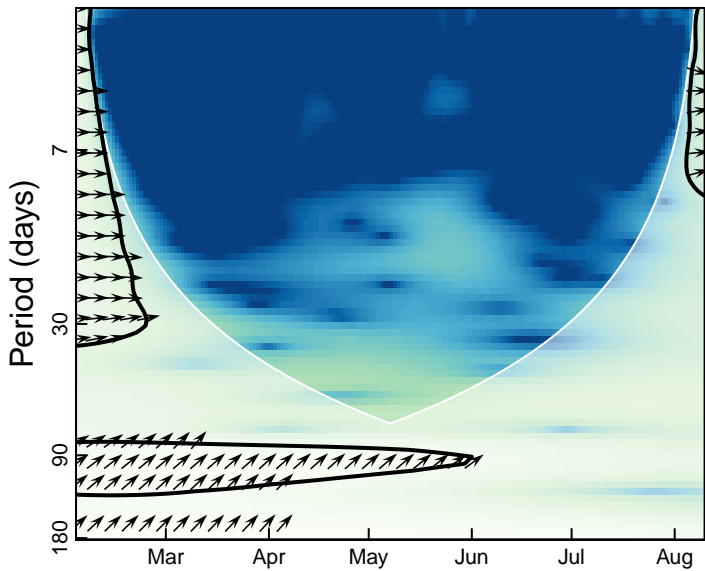

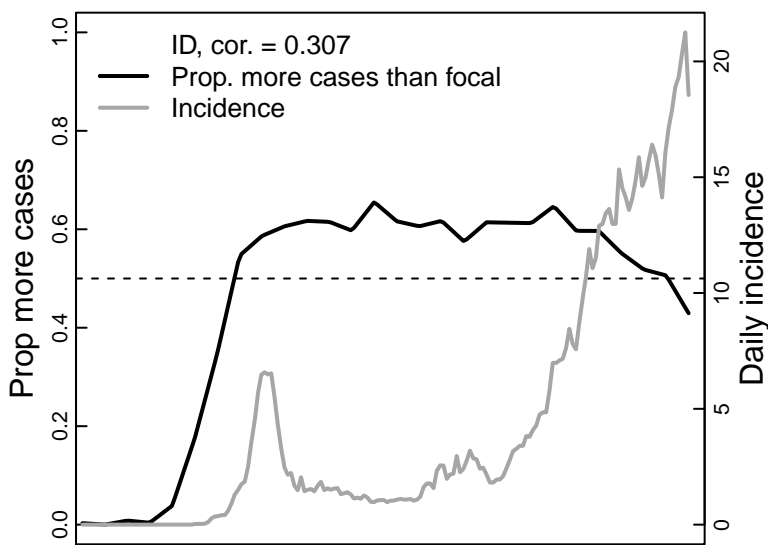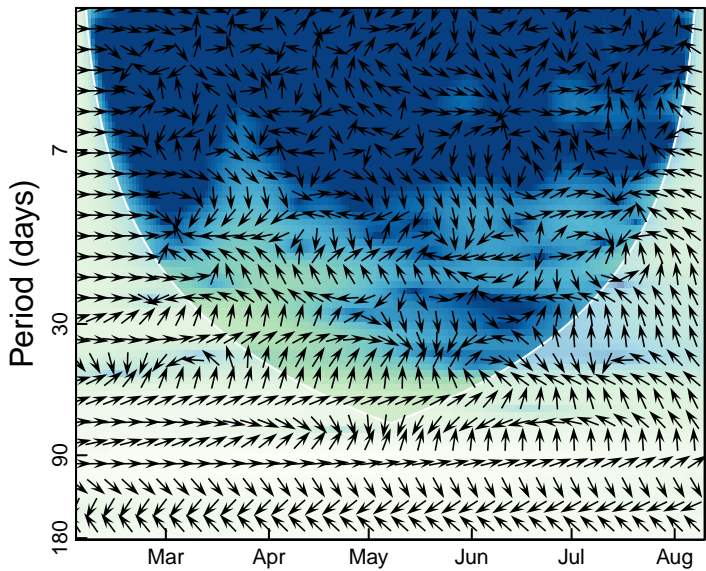

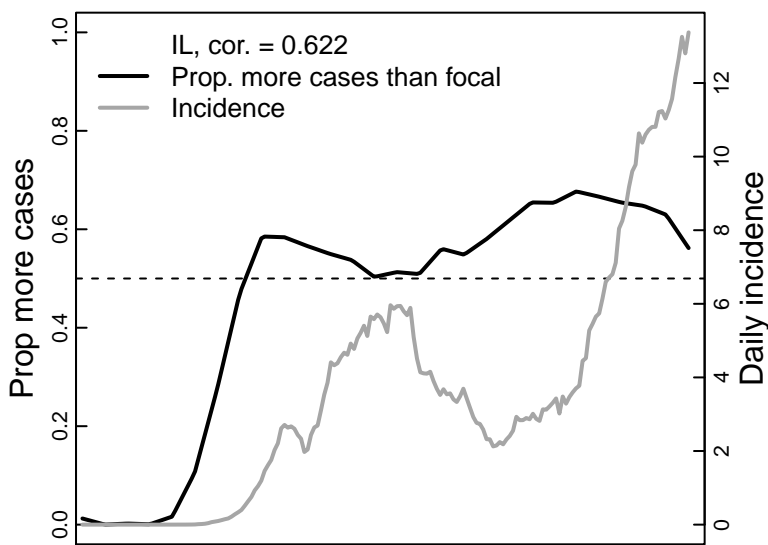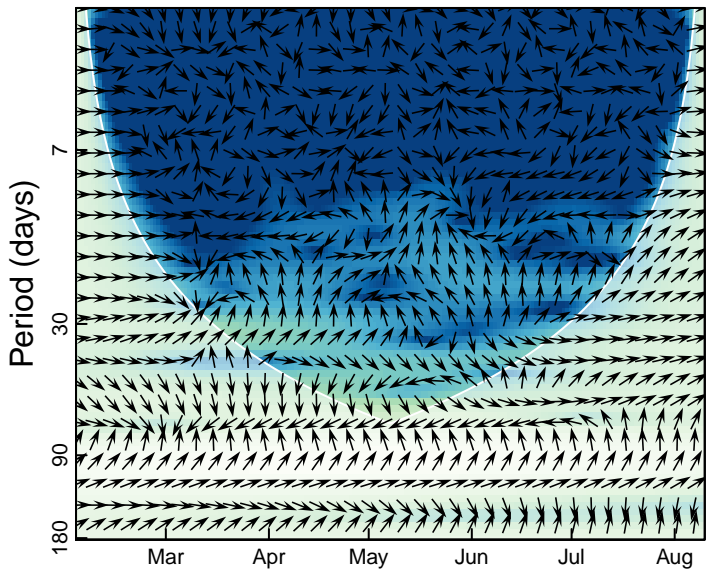

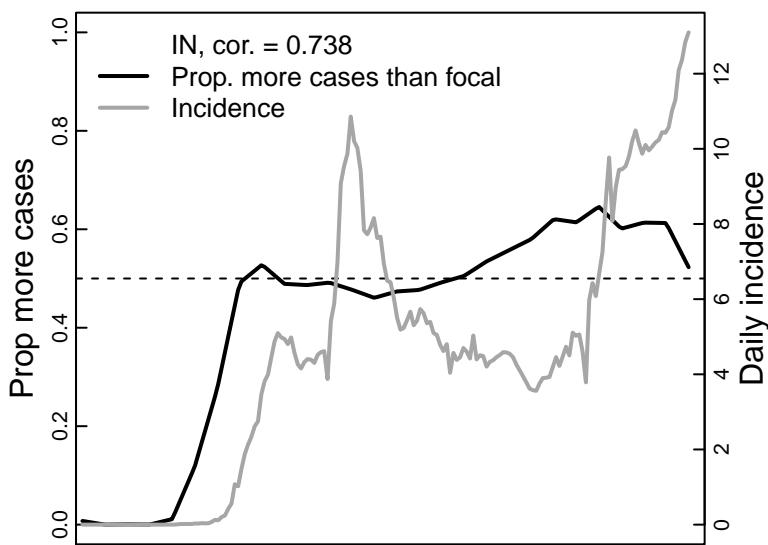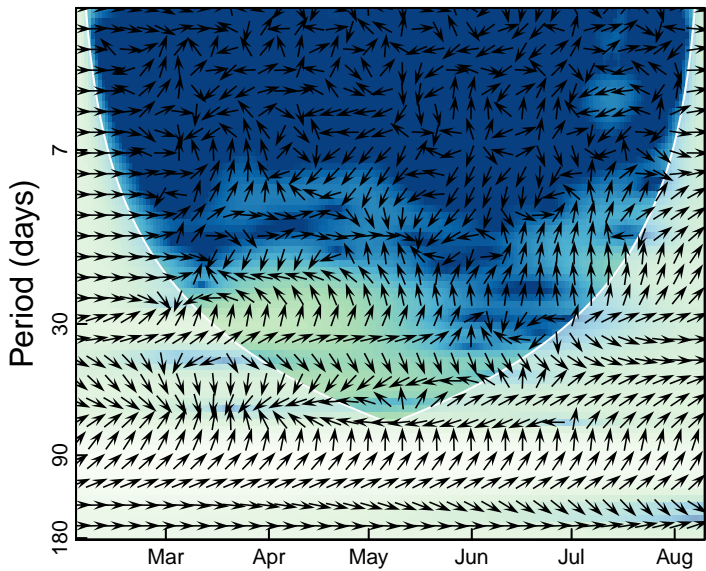



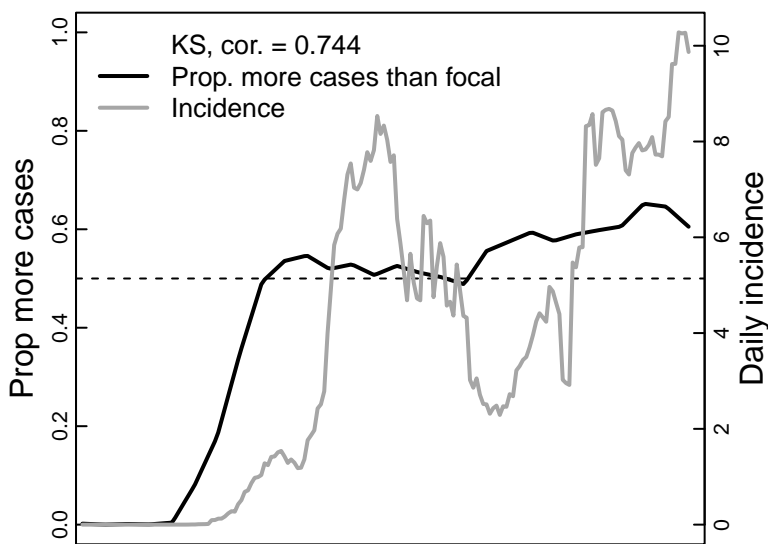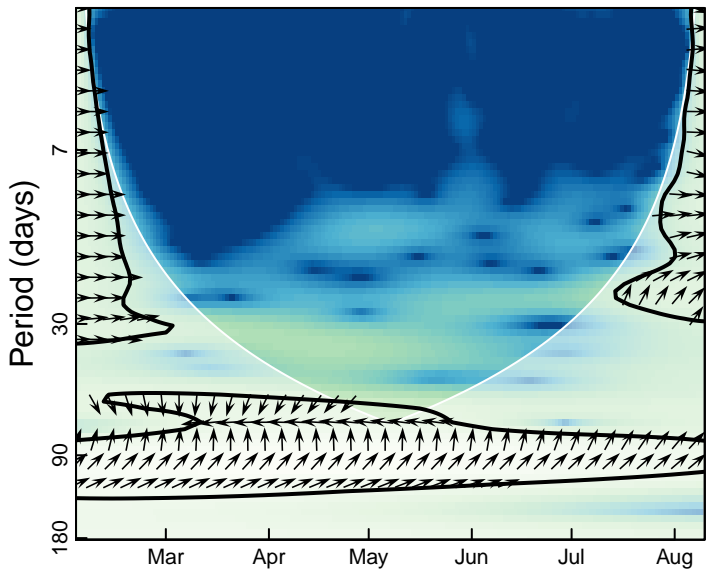

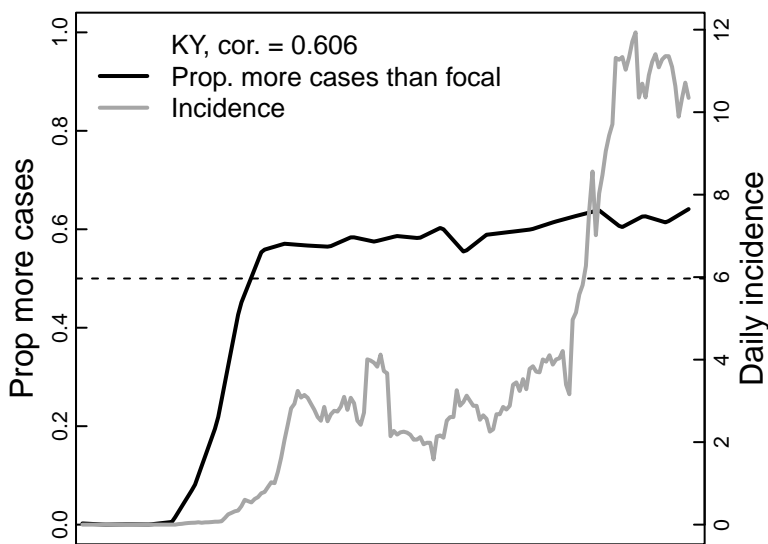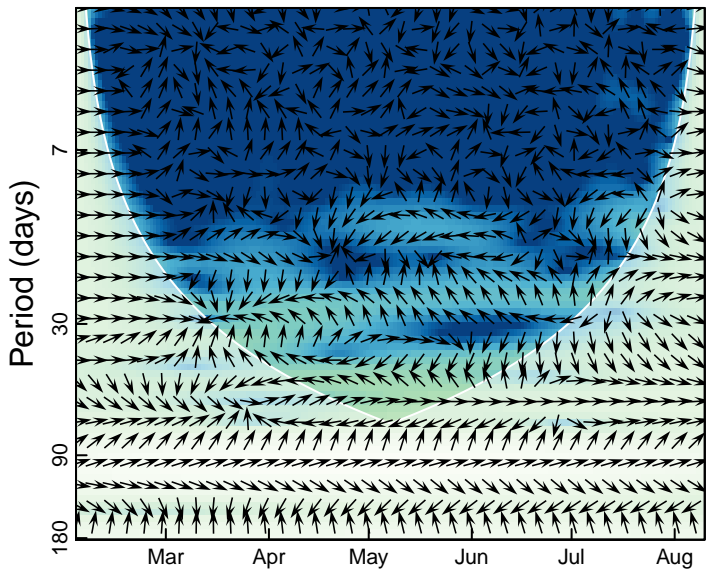

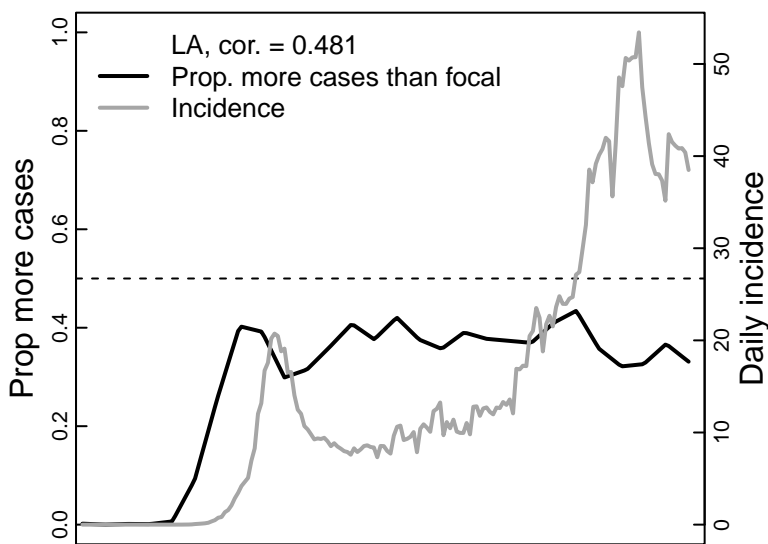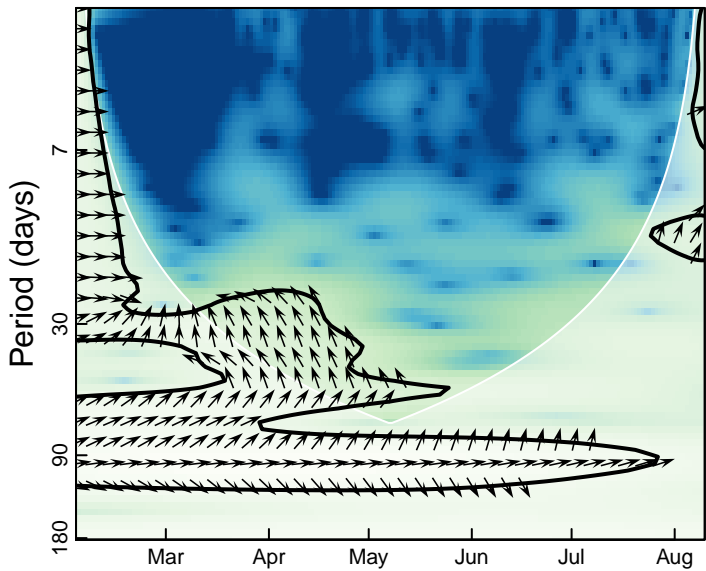

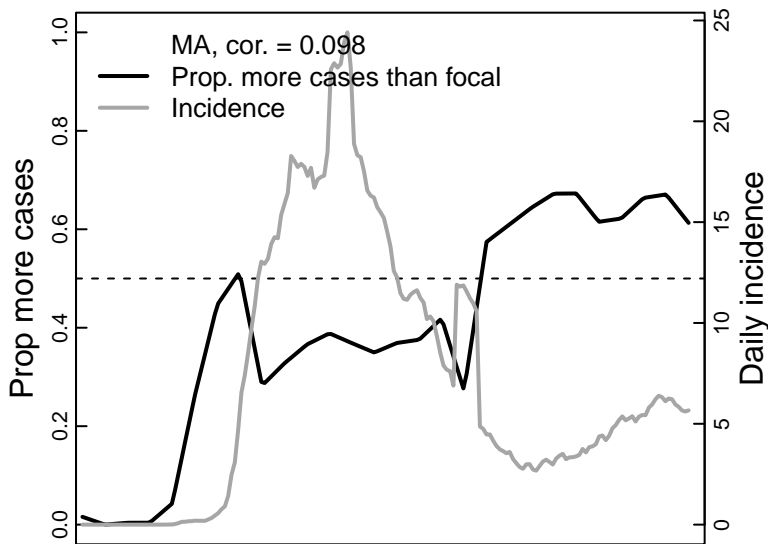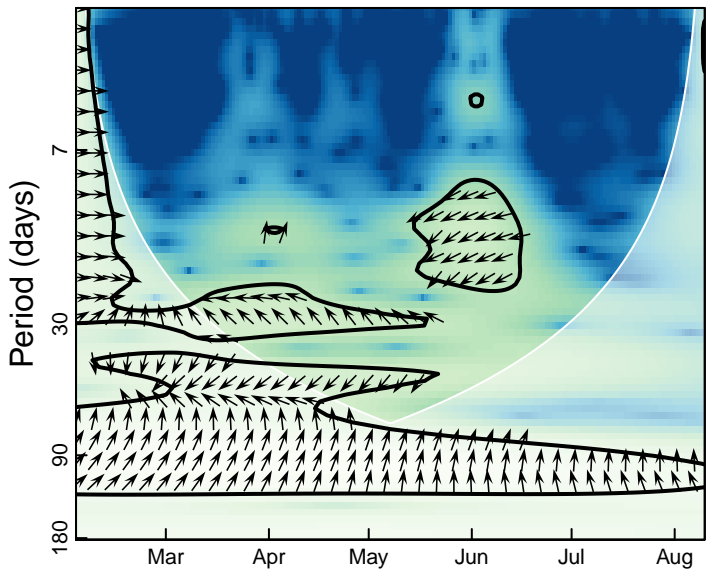

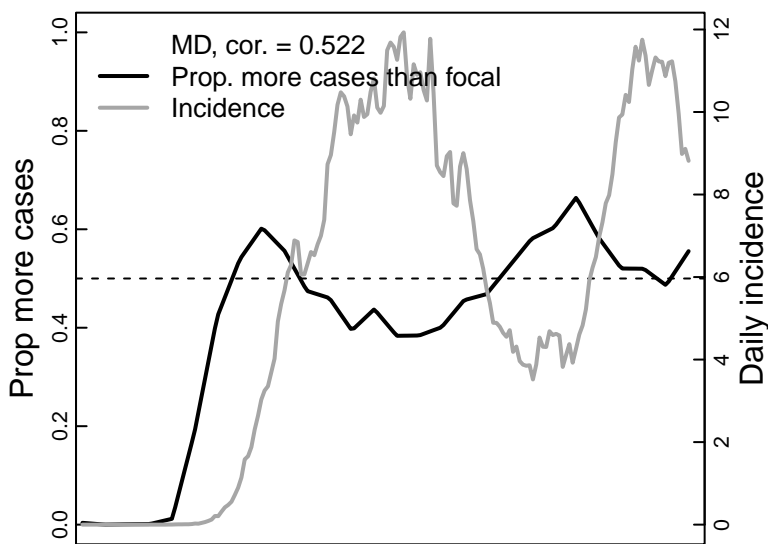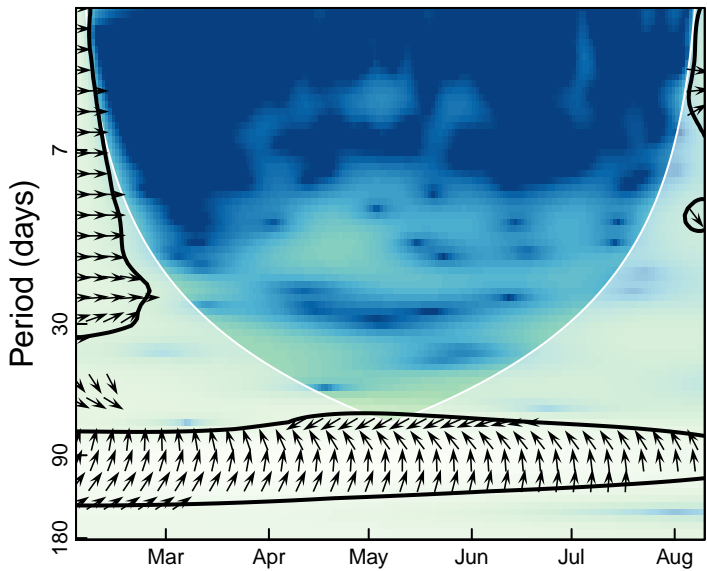

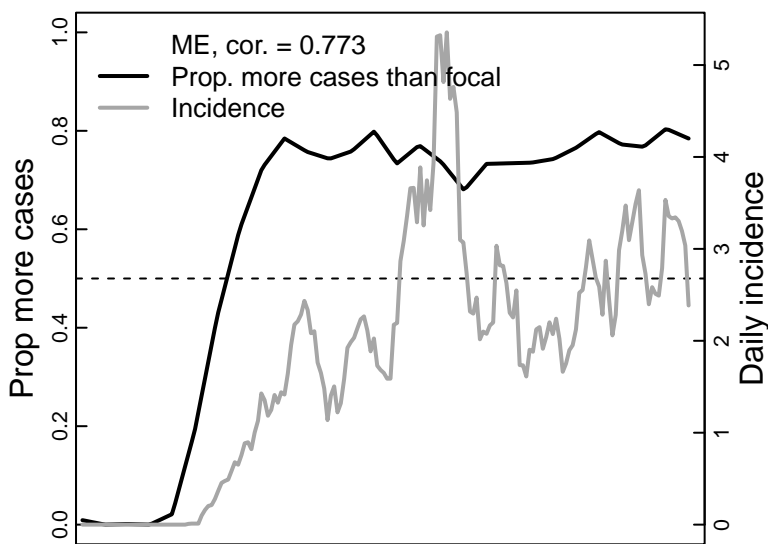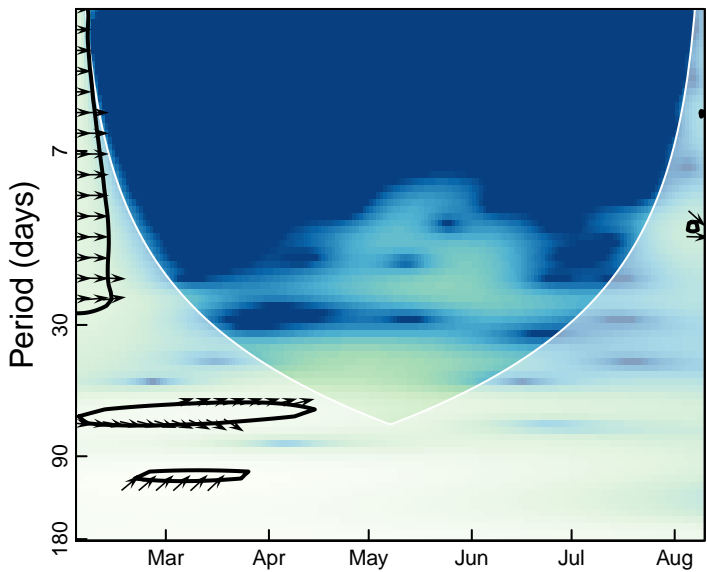

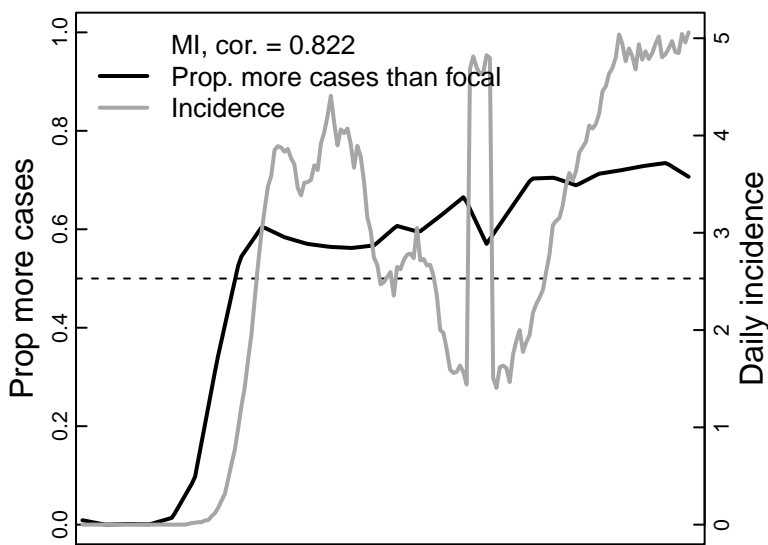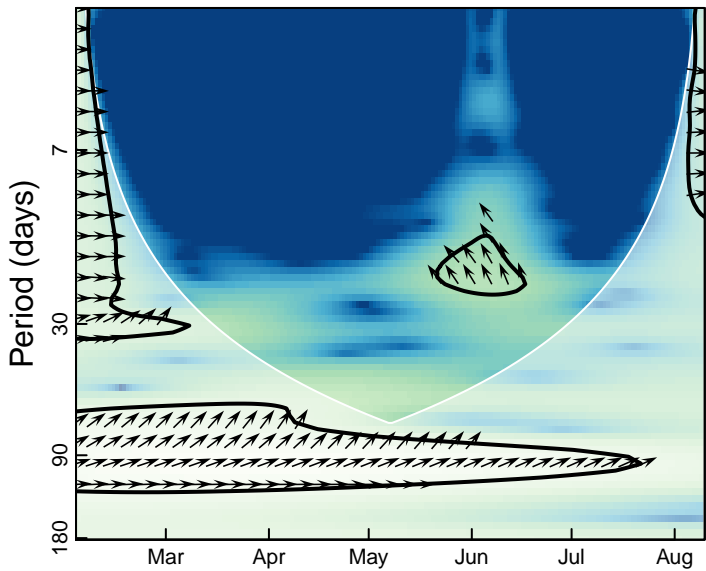

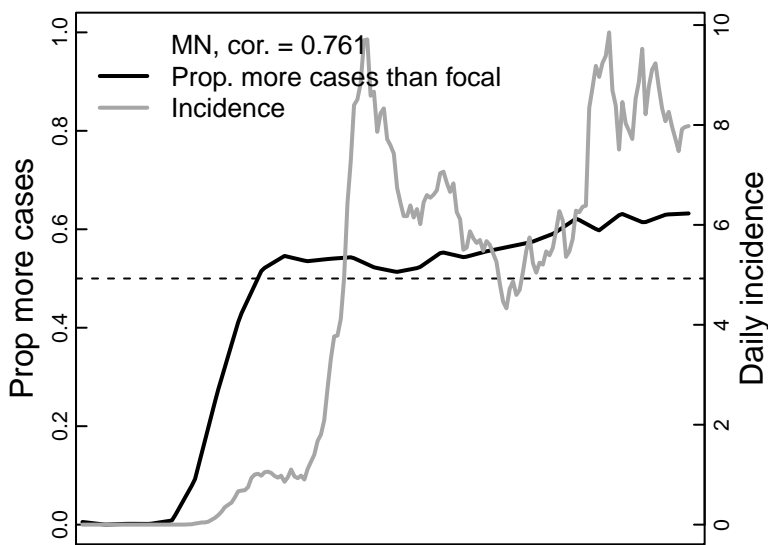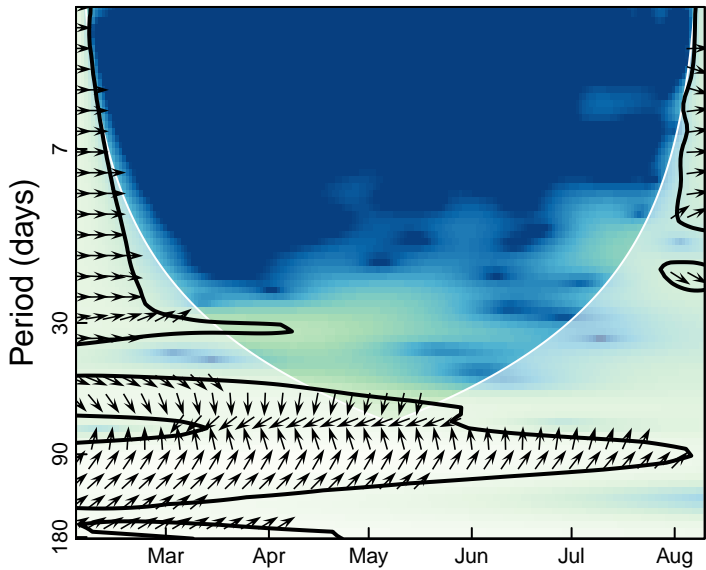



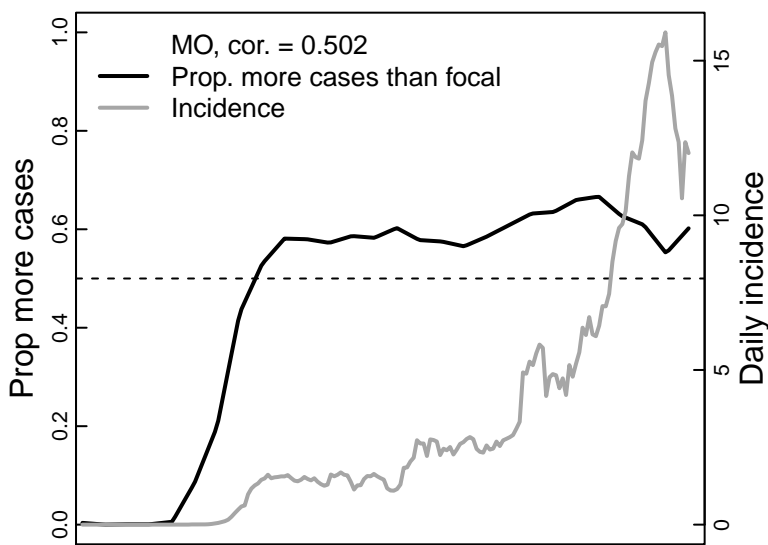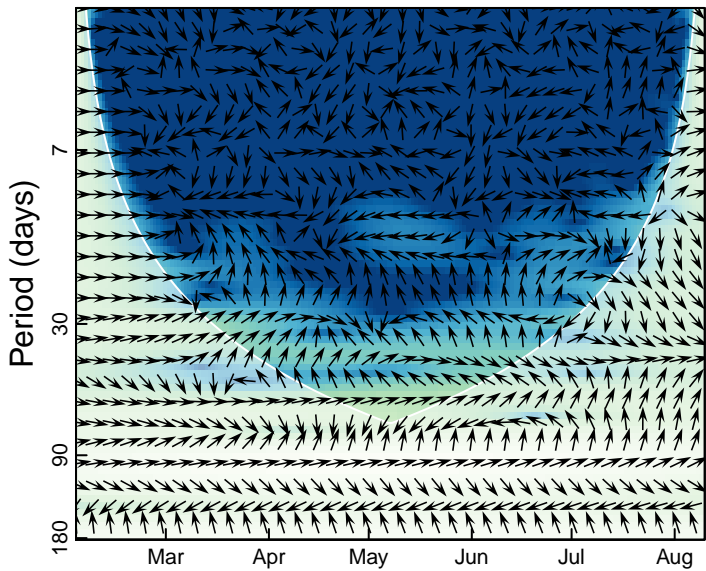

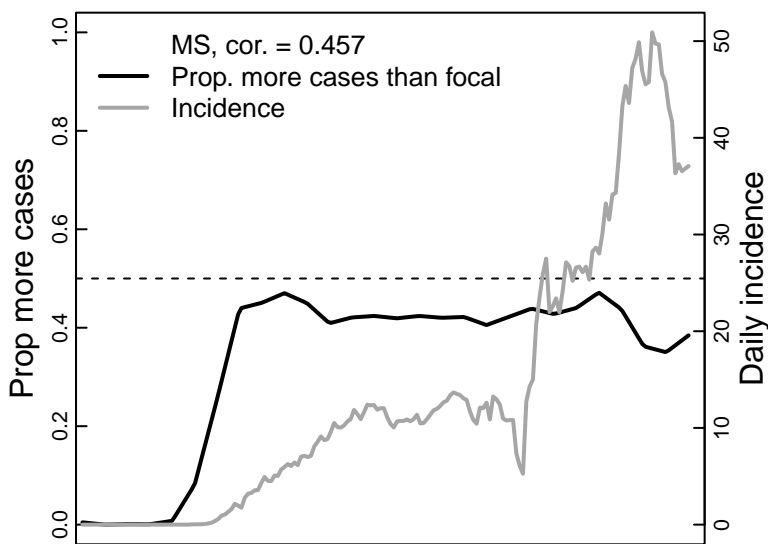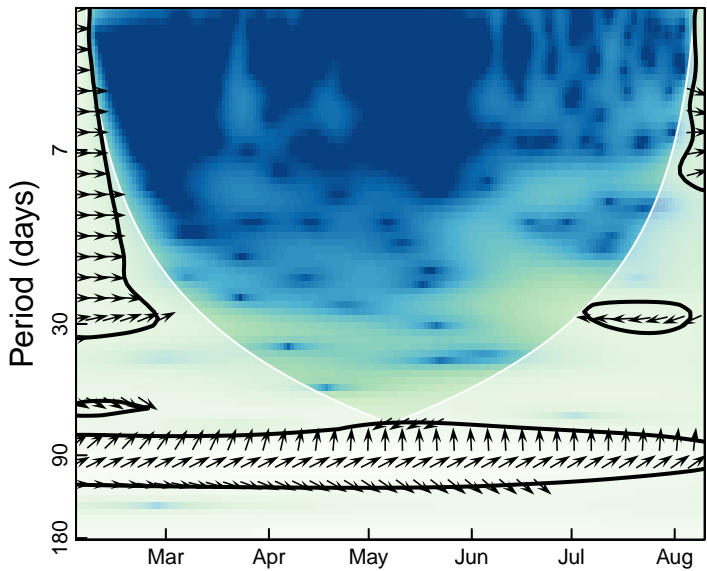

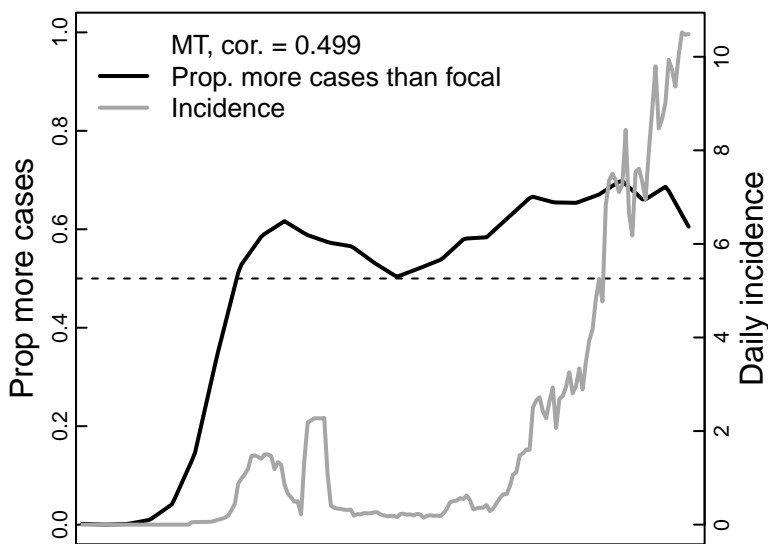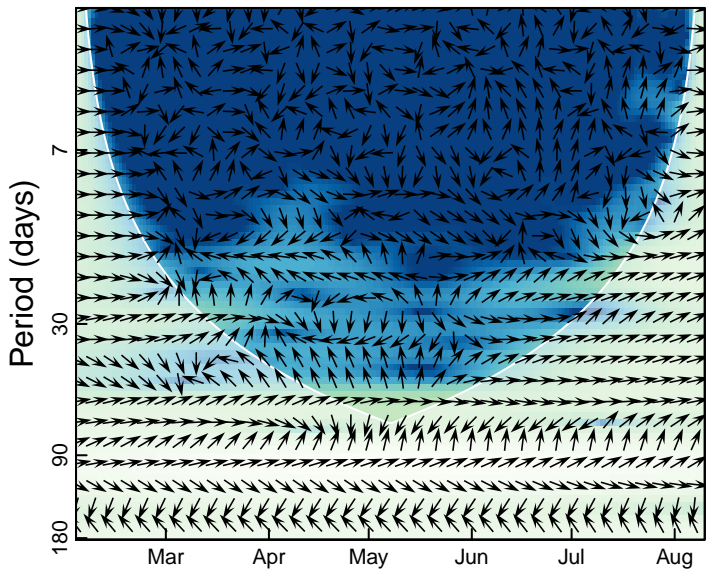

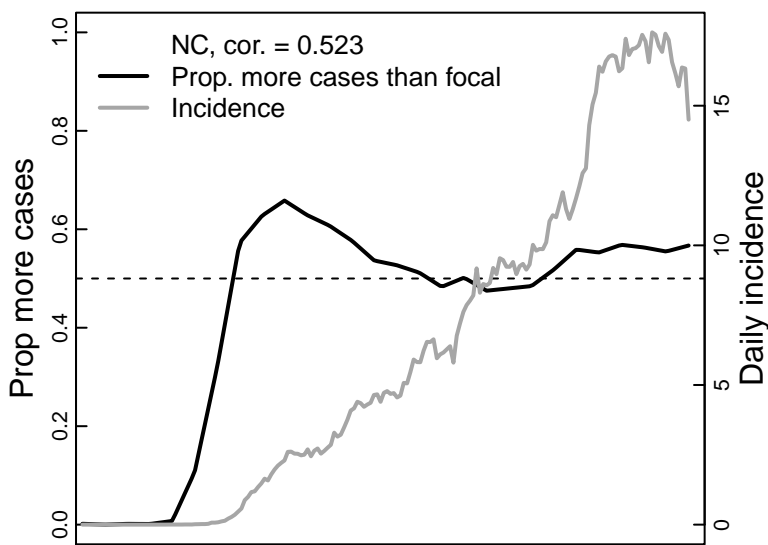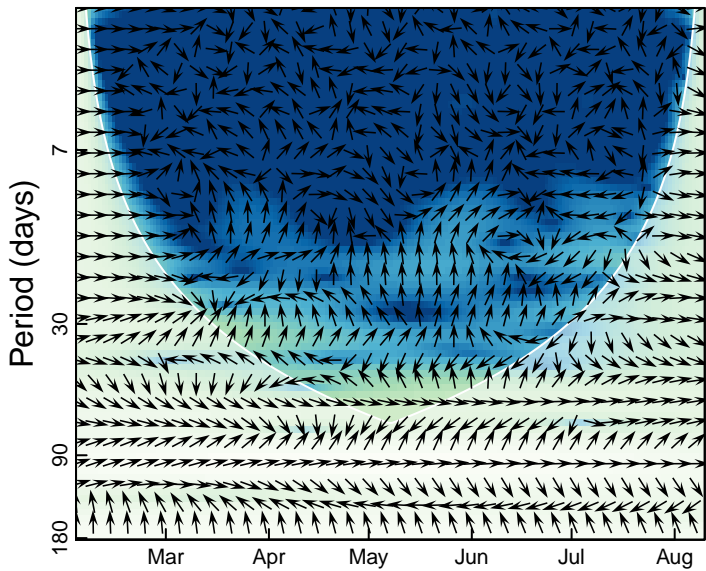

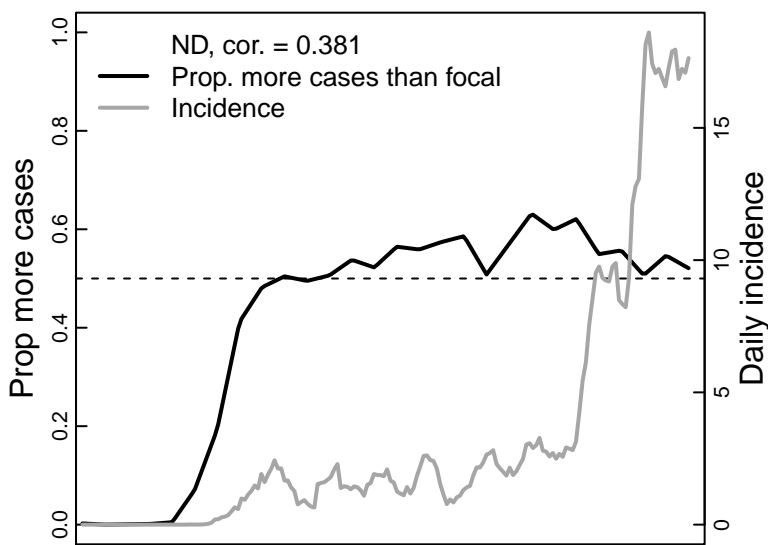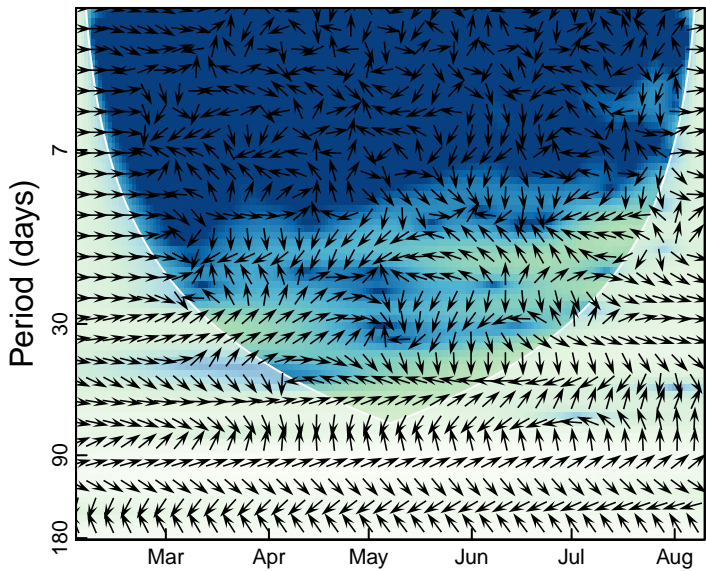

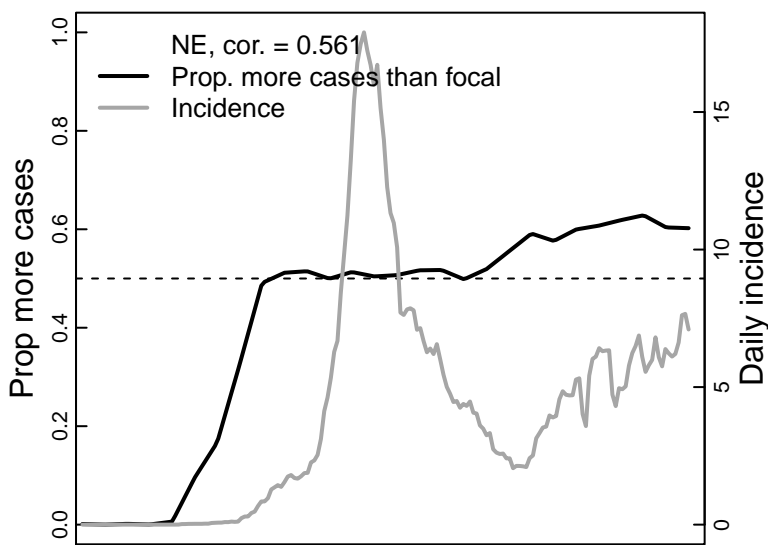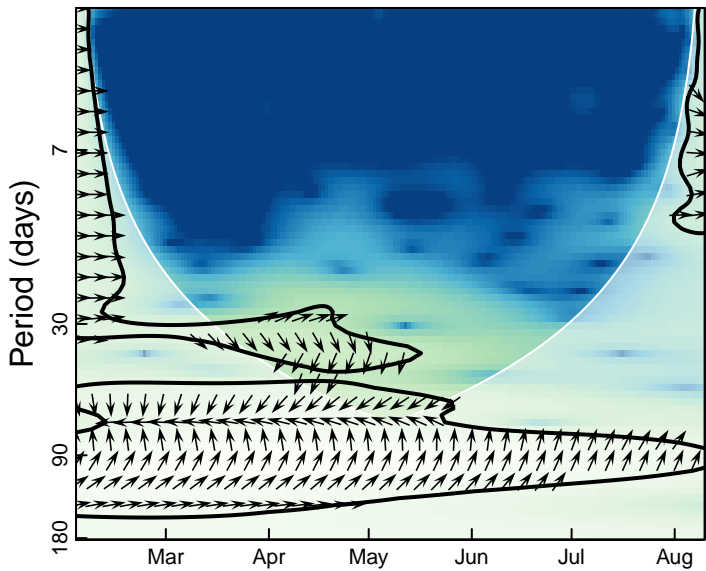

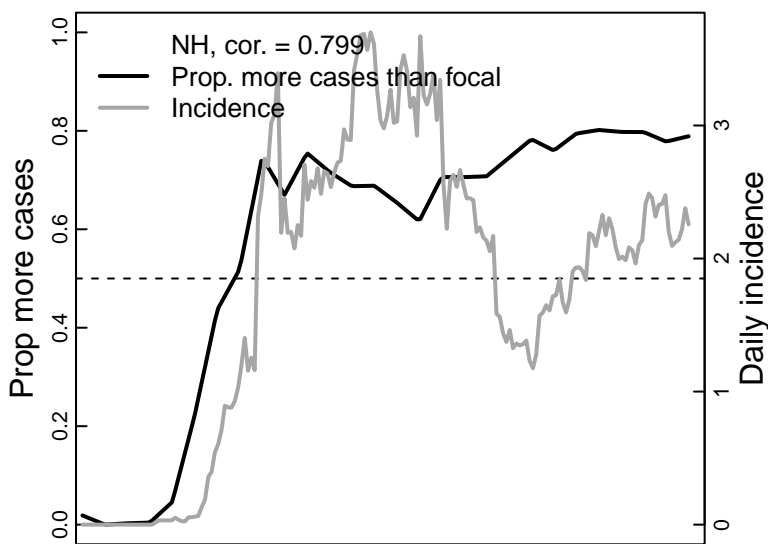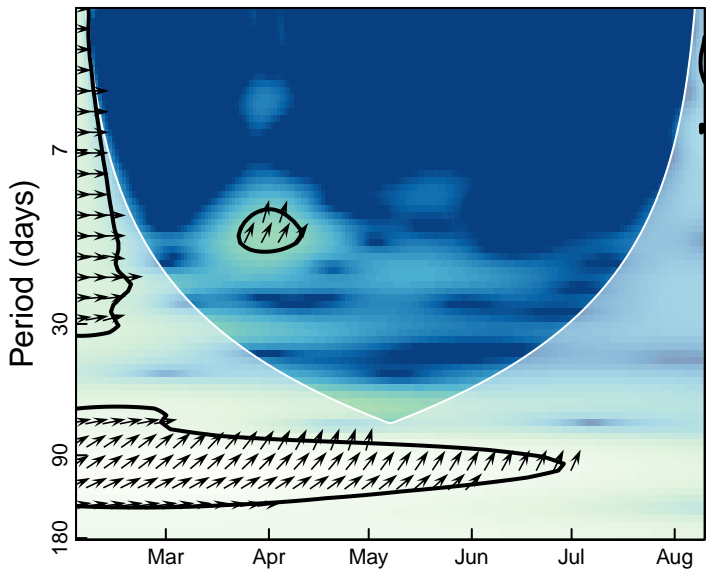

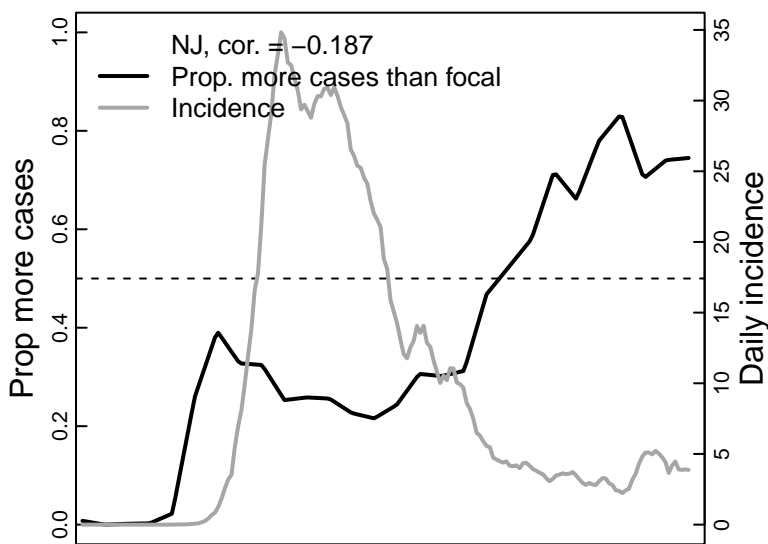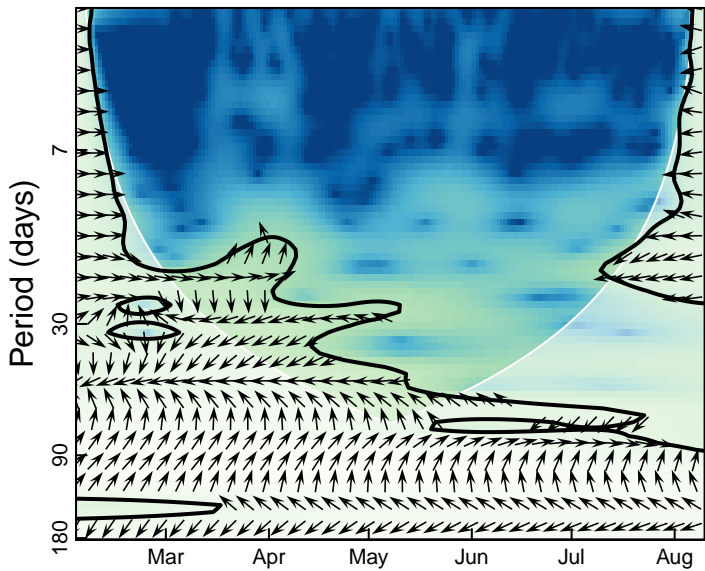





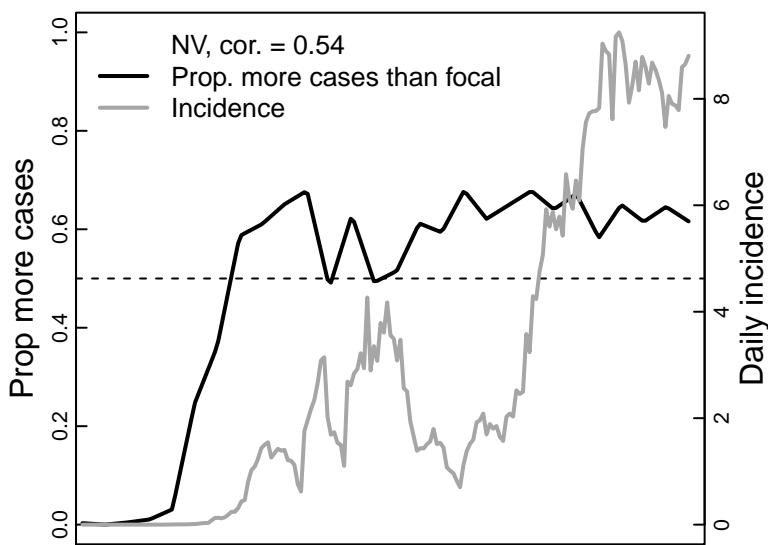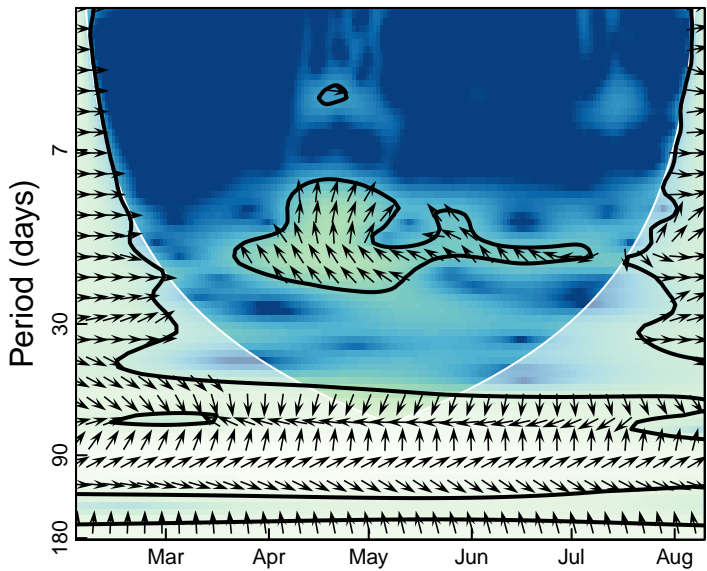

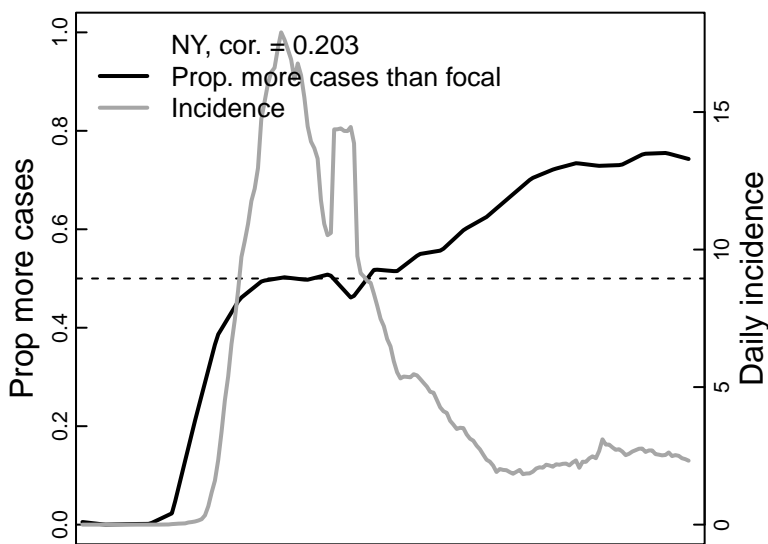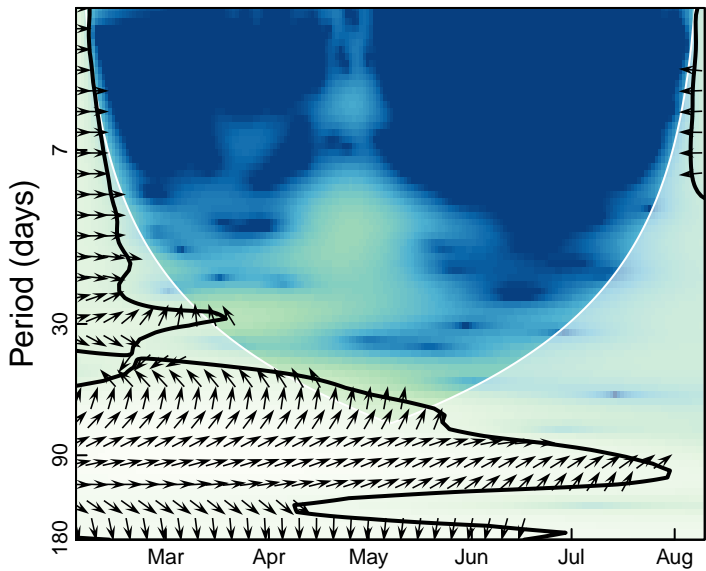

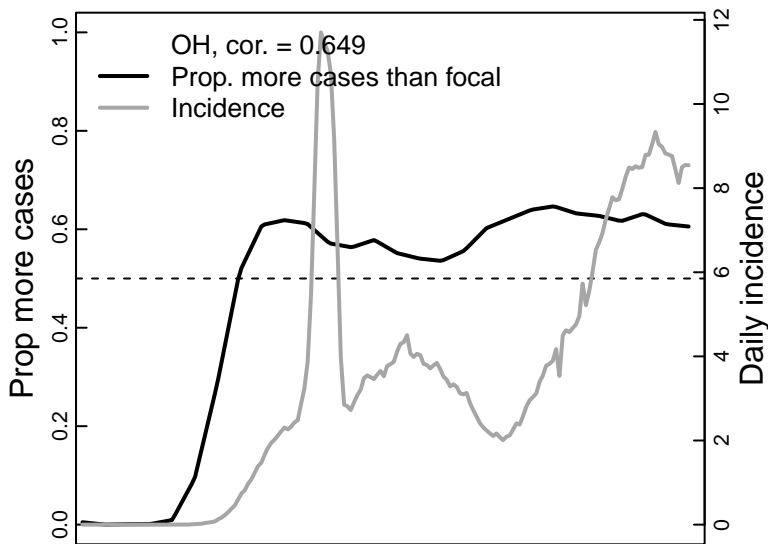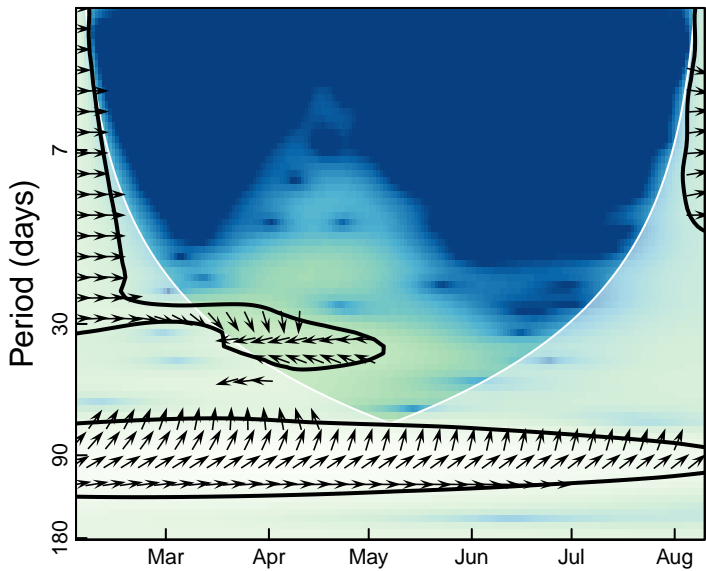

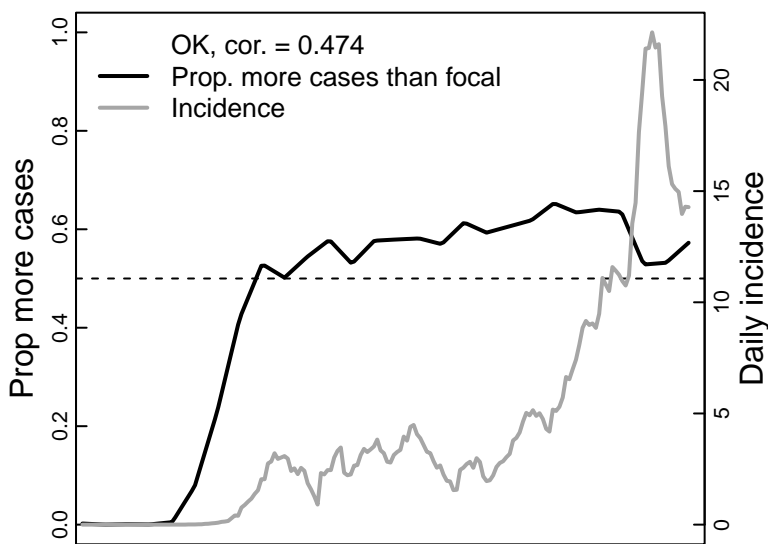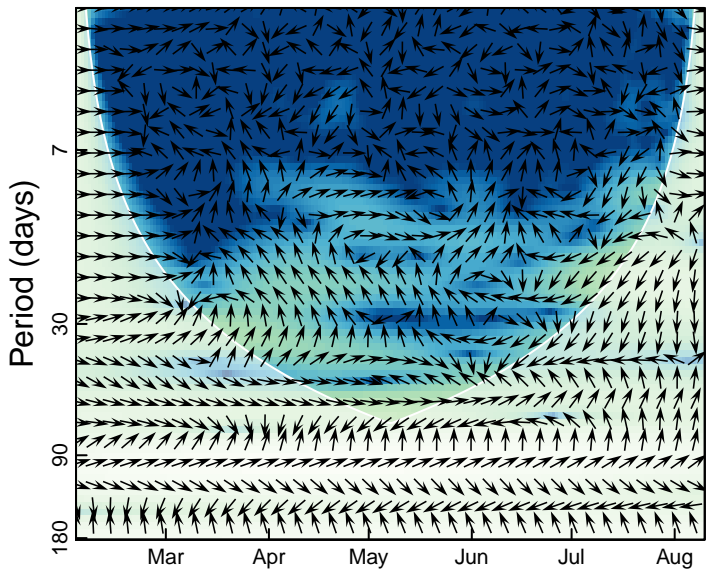

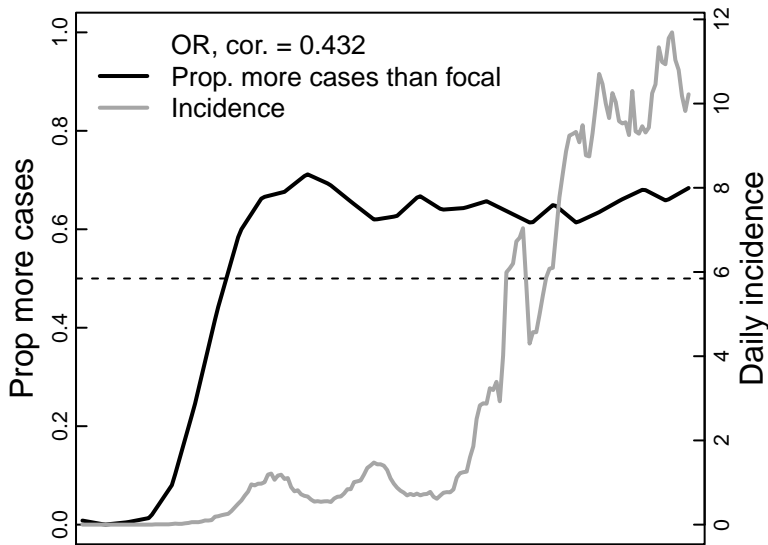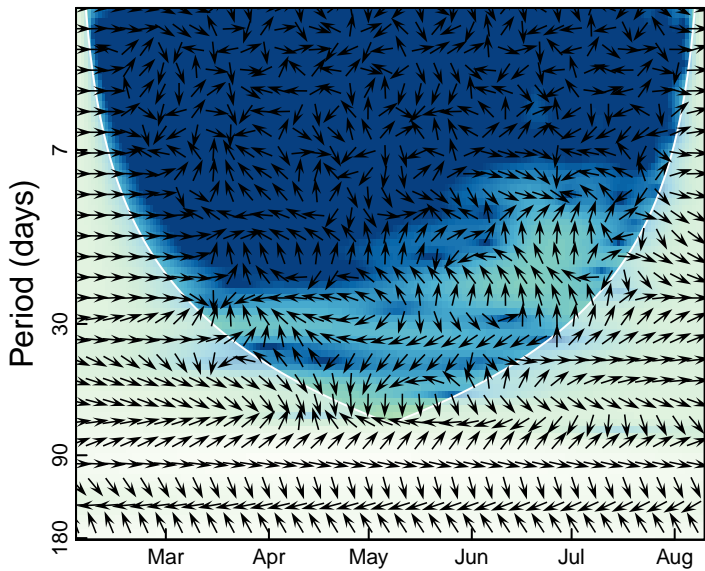

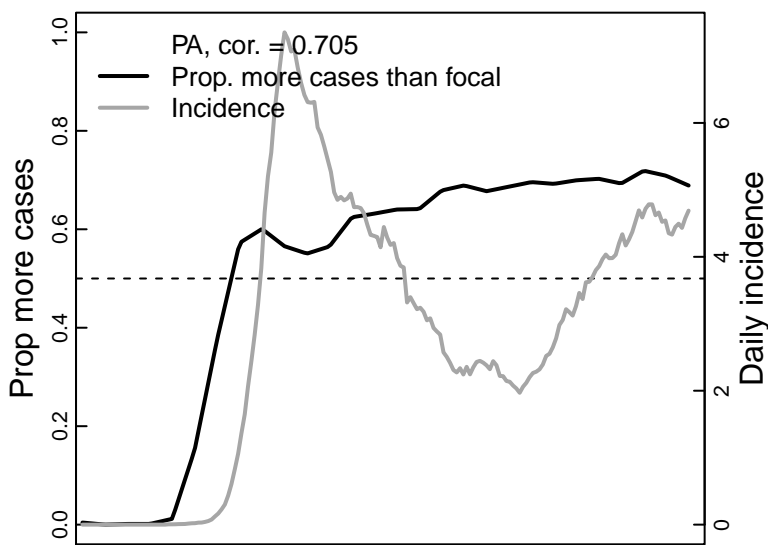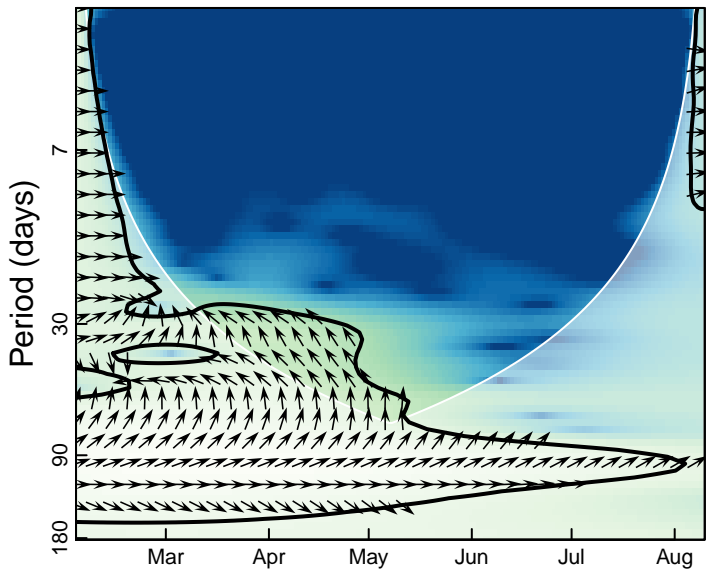

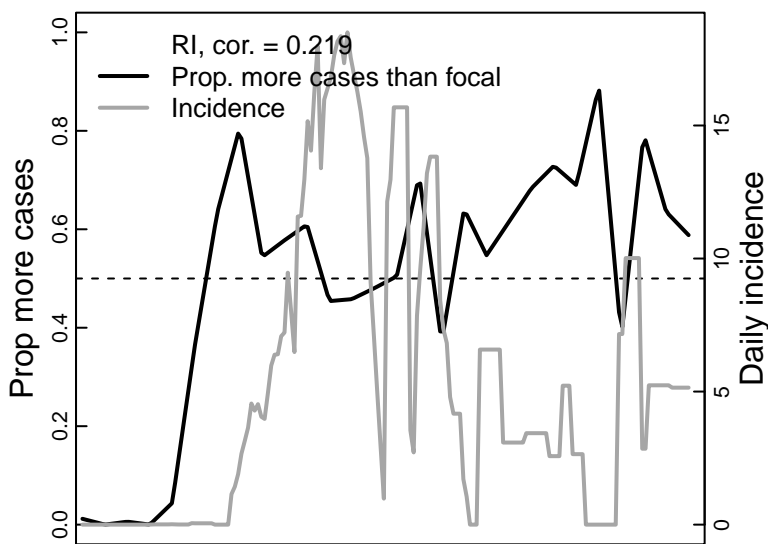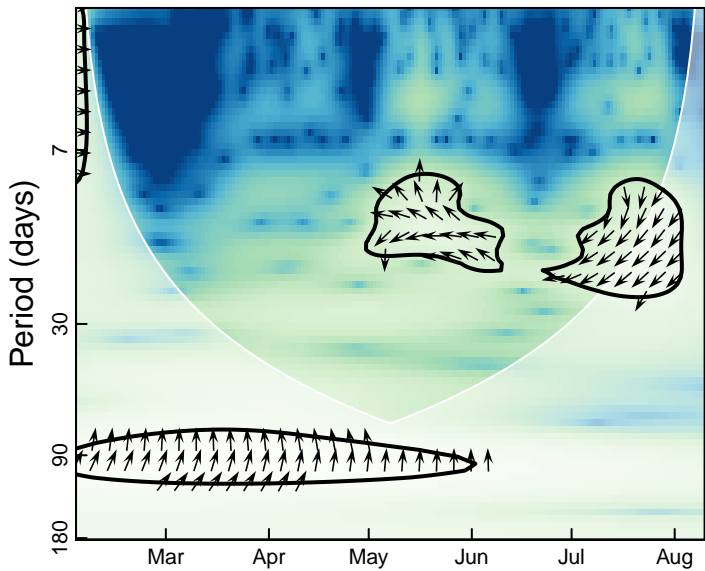



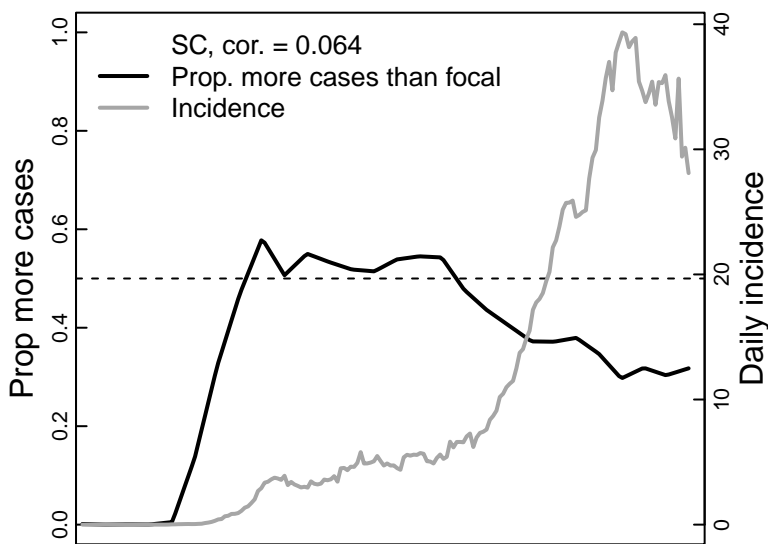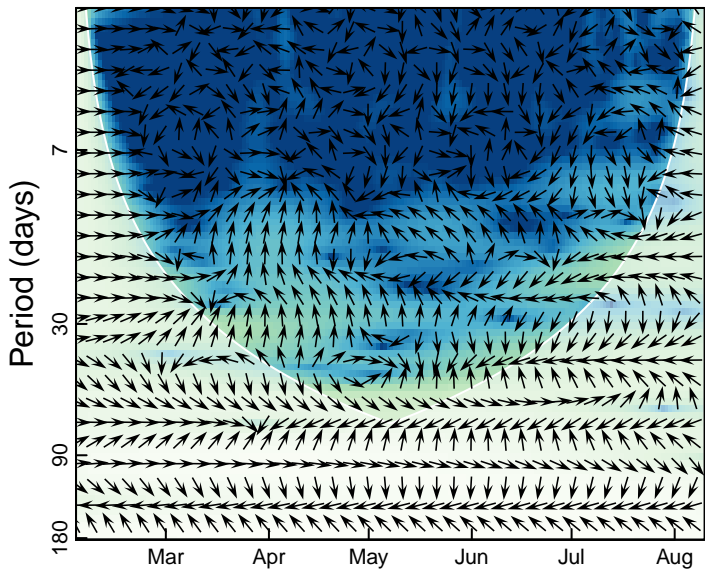

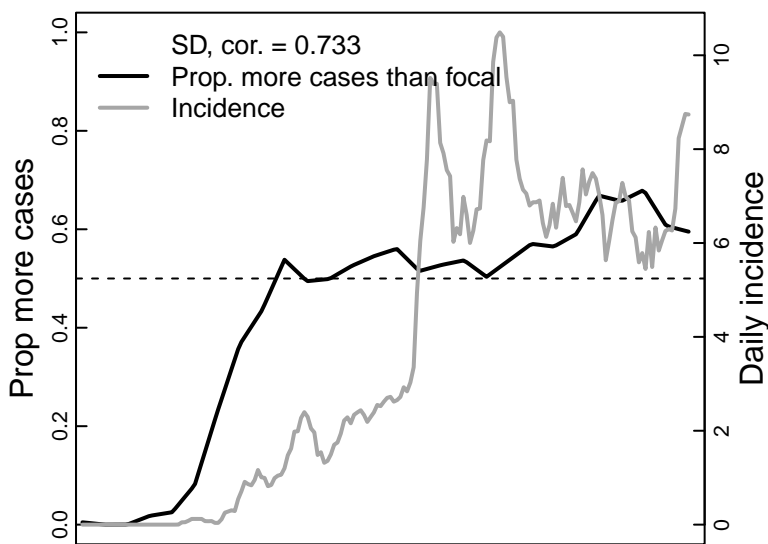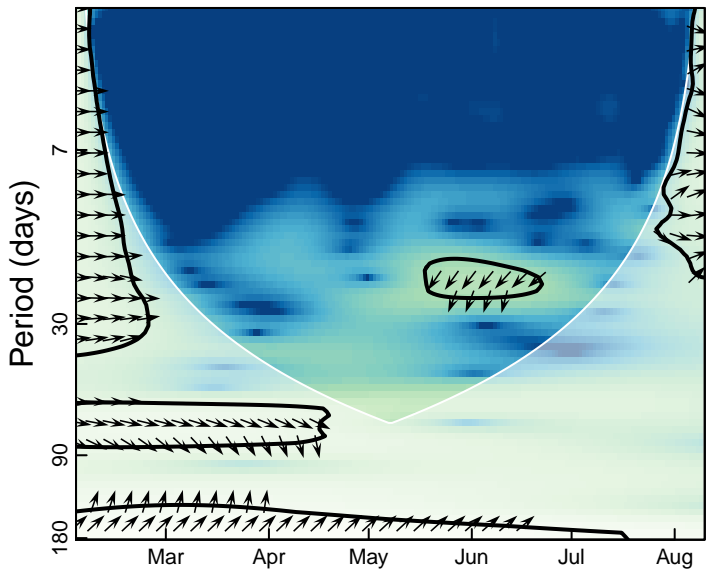

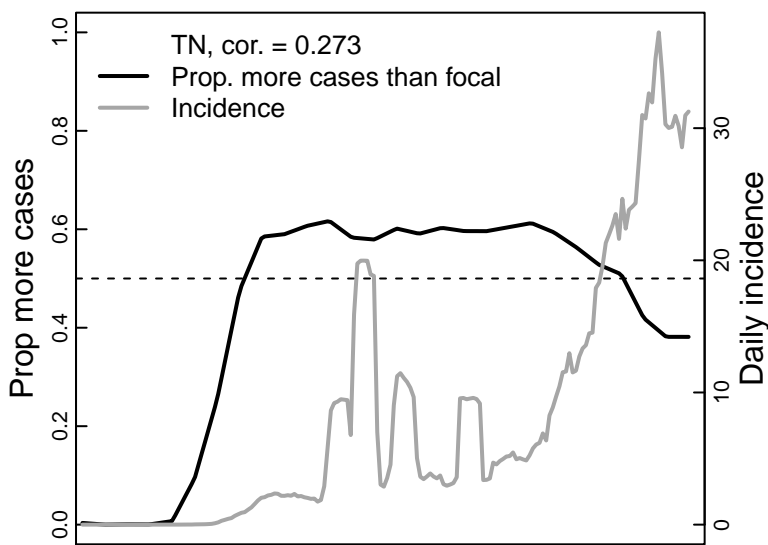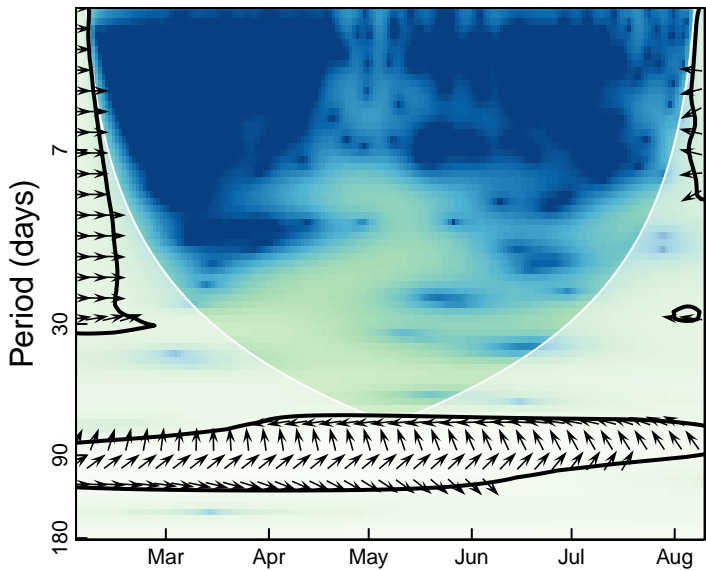

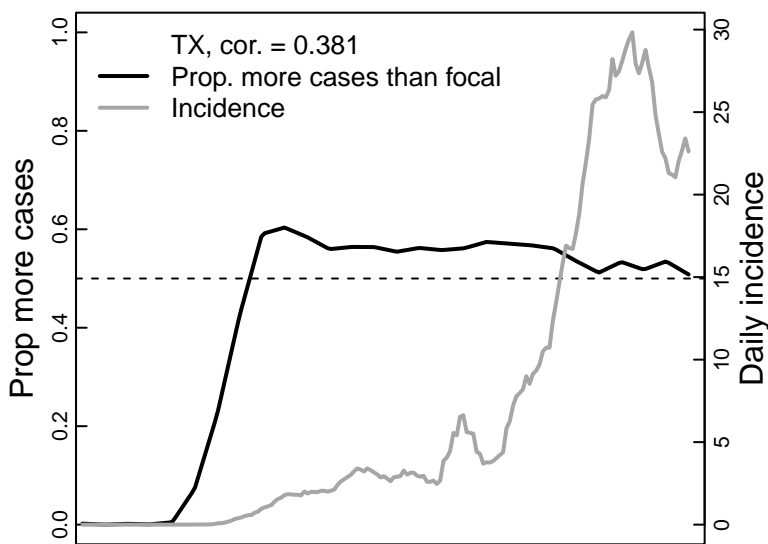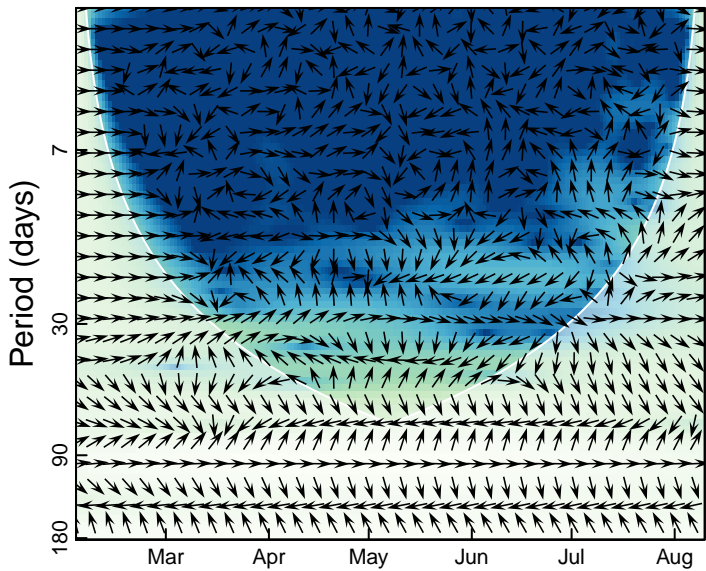

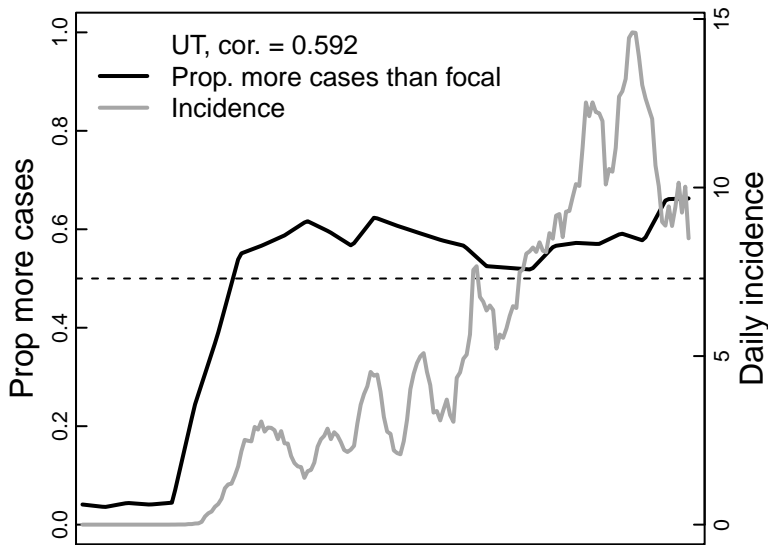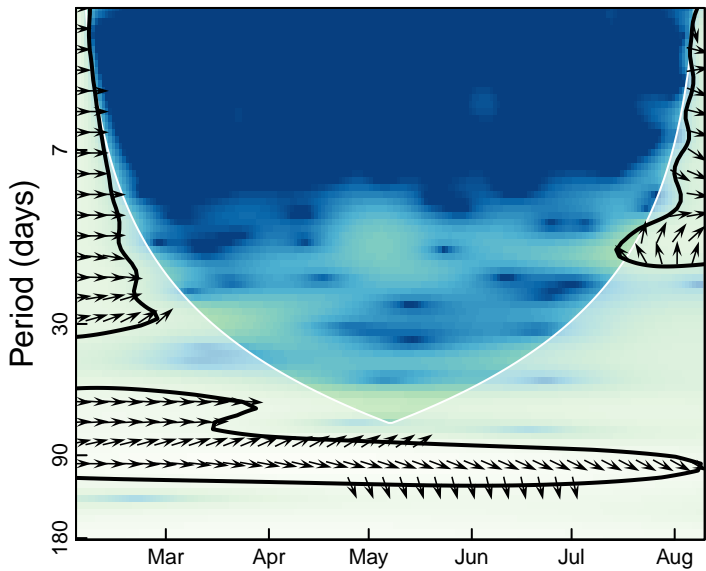

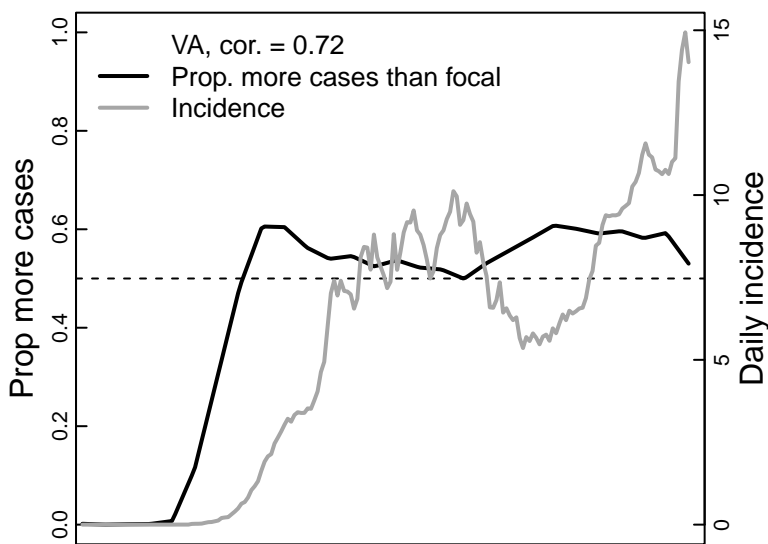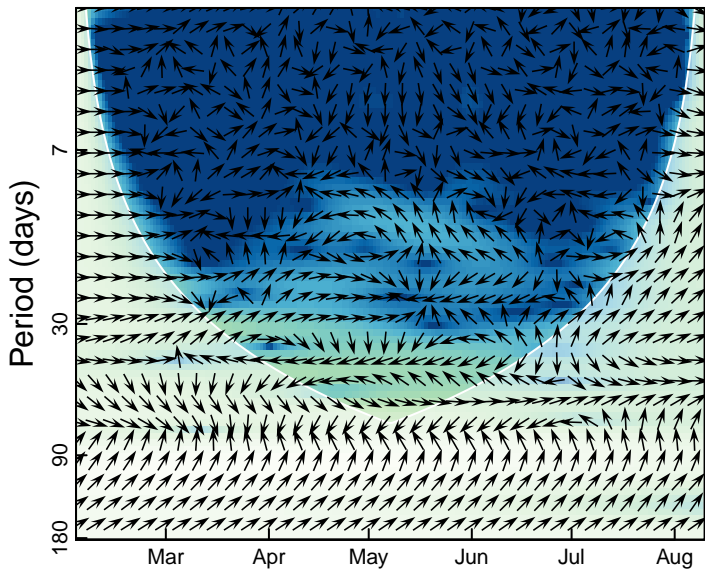



Prop more cases

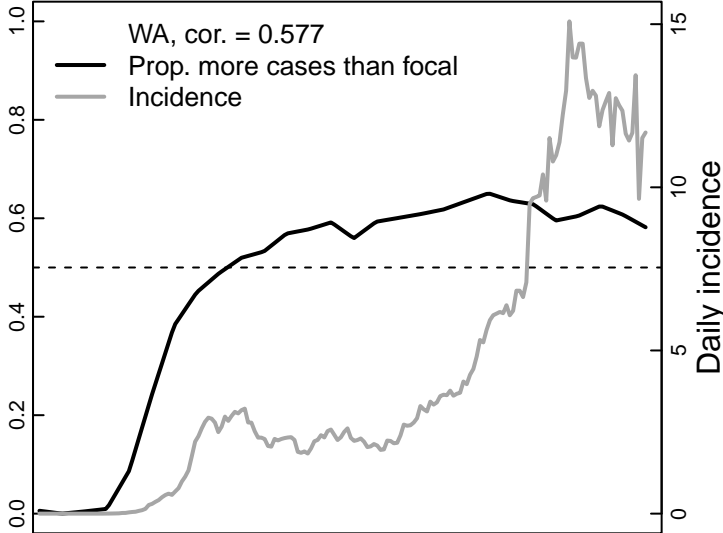

Period (days)

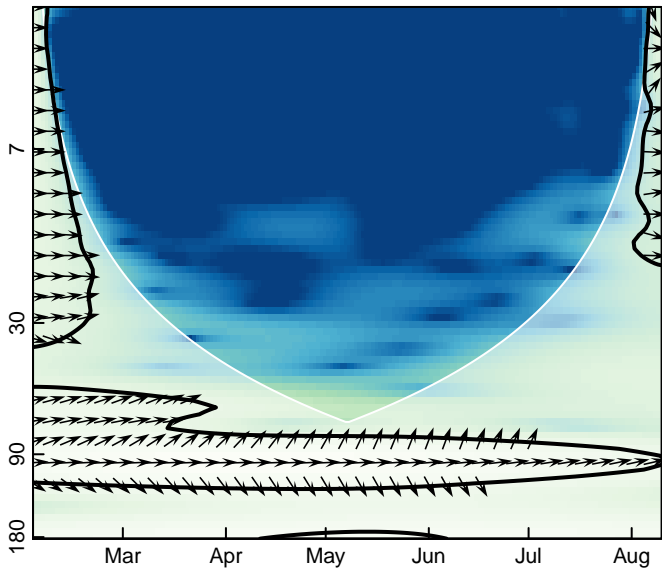



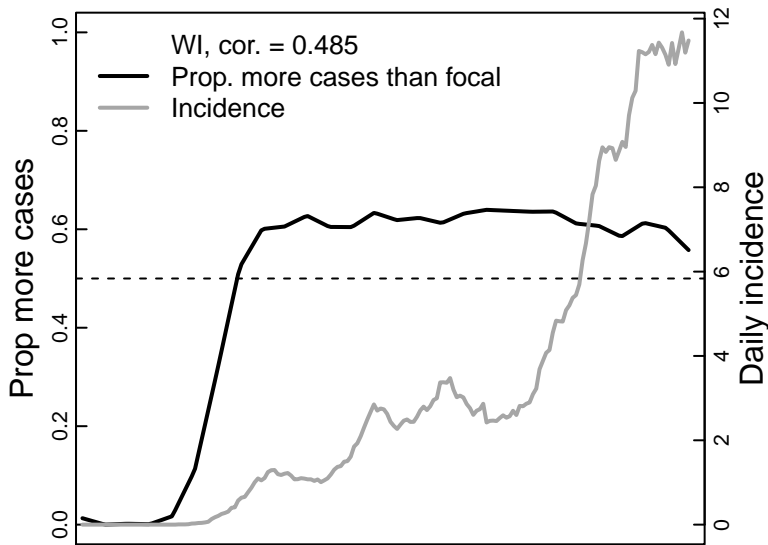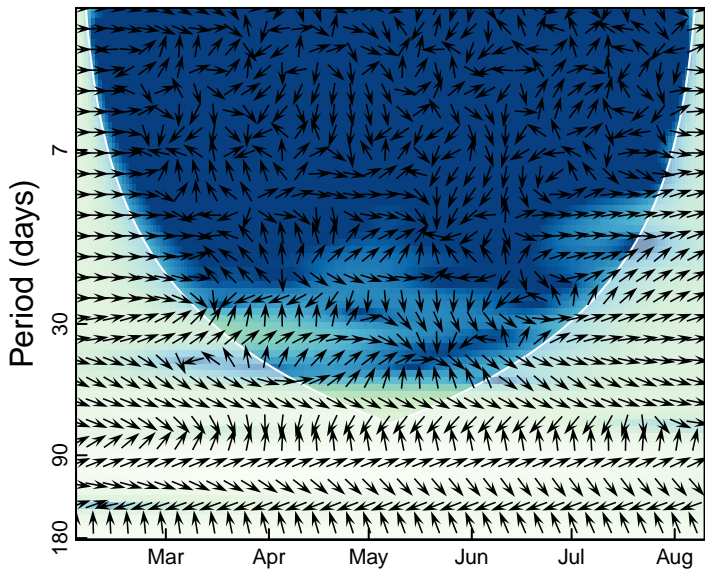

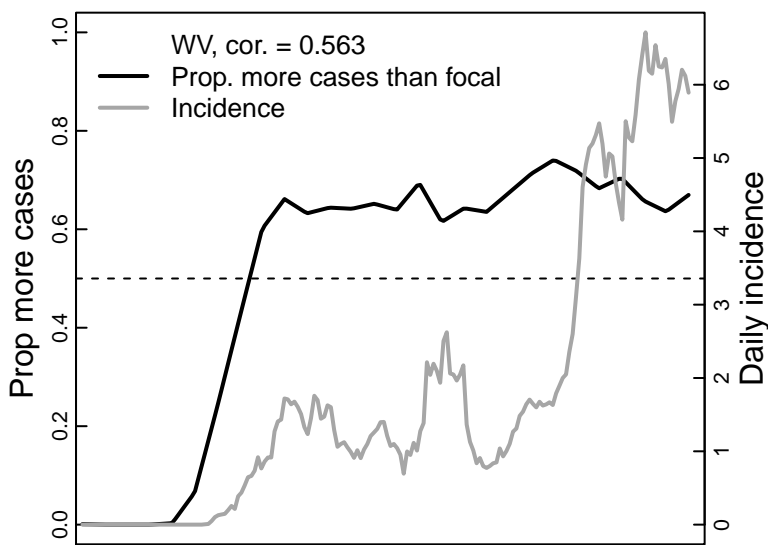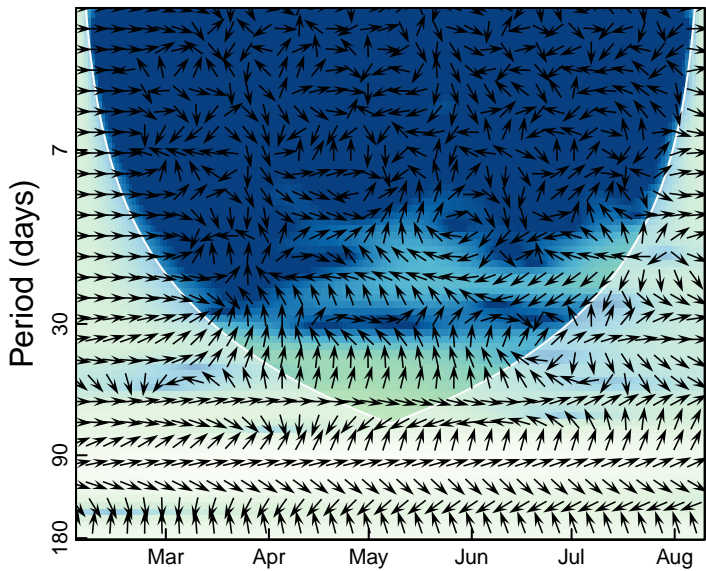

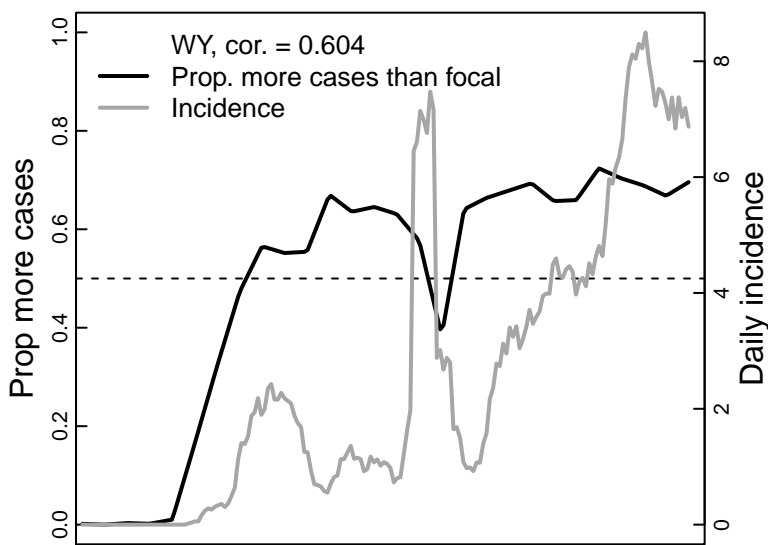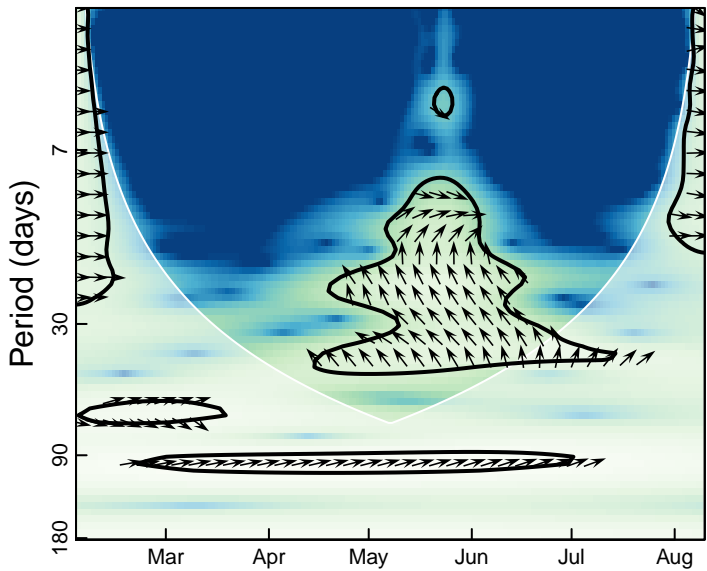

Supplement: Supplementary file [file media-8.pdf]
